# Supplementary material for: Investigating the applicability of COPERT 5.5 emission software in Bangladesh and developing countrywide vehicular emission inventories
Source: Royal Society of Chemistry journal article supplement (doi:10.1039/d3ea00047h), 2023-11-21
Supplement: d3ea00047h1.zip [file d3ea00047h1.zip]

**APPLICATION OF COPERT 5.5 EMISSION SOFTWARE TO  
DEVELOP VEHICULAR EMISSION INVENTORIES, ESTIMATE  
LOCKDOWN IMPACT AND PREDICT FUTURE TREND OF  
EMISSIONS FOR BANGLADESH**

SAKIE KAWSAR

SOURAV BISWAS

MUNTASIR NOOR

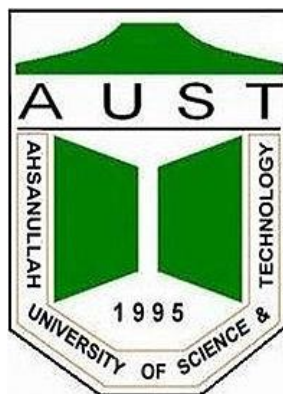

DEPARTMENT OF CIVIL ENGINEERING  
AHSANULLAH UNIVERSITY OF SCIENCE AND TECHNOLOGY  
JUNE 2022

# **APPLICATION OF COPERT 5.5 EMISSION SOFTWARE TO DEVELOP VEHICULAR EMISSION INVENTORIES, ESTIMATE LOCKDOWN IMPACT AND PREDICT FUTURE TREND OF EMISSIONS FOR BANGLADESH**

A Thesis

Submitted by

|               |                          |
|---------------|--------------------------|
| Sakie Kawsar  | Student ID: 17.02.03.001 |
| Sourav Biswas | Student ID: 17.02.03.041 |
| Muntasir Noor | Student ID: 17.02.03.026 |

In partial fulfillment of the requirements for the degree of  
Bachelor of Science in Civil Engineering

Under the supervision of

Dr. Md. Shahid Mamun

Professor

Department of Civil Engineering

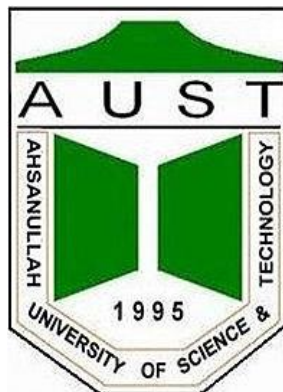

AHSANULLAH UNIVERSITY OF SCIENCE AND TECHNOLOGY

JUNE 2022

## DECLARATION

We hereby declare that the thesis work entitled “**Application of COPERT 5.5 Emission Software to Develop Vehicular Emission Inventory, Estimate Lockdown Impact and Predict Future Trend of Emission for Bangladesh**” submitted to the Ahsanullah University of Science and Technology done by the members of this group collectively. We also state that the materials embodied in this report have not been published or submitted anywhere before date for any other purpose to award of any degree.

-----  
Sakie Kawsar  
Student ID: 17.02.03.001

-----  
Sourav Biswas  
Student ID: 17.02.03.041

-----  
Muntasir Noor  
Student ID: 17.02.03.026

This thesis titled entitled “**Application of COPERT 5.5 Emission Software to Develop Vehicular Emission Inventory, Estimate Lockdown Impact and Predict Future Trend of Emission for Bangladesh**” has been accepted as satisfactory in partial fulfillment of the requirement for the degree of Bachelor of Science in Civil Engineering on June, 2022.

-----  
Dr. Md. Shahid Mamun  
Professor  
Department of Civil Engineering  
Ahsanullah University of Science and Technology

**DEDICATED TO  
PARENTS, FAMILY & TEACHERS**

## **ACKNOWLEDGEMENTS**

First of all, we would like to begin by expressing our gratitude to the Almighty for providing us the strength, wisdom, skill and opportunity to carry out this thesis and complete it successfully.

Secondly, we are grateful and would like to express our deepest gratitude to our supervisor, Dr. Md. Shahid Mamun, Professor, Department of Civil Engineering, Ahsanullah University of Science and Technology, for his constant guidance and assistance during this thesis. He has always been a source of inspiration for us because of his constructive suggestions and supportive remarks. Completing this task without his instructions and advices would never have been possible.

We would like to pay our deepest homage to our parents and family members for their undying support and encouragement.

We are indebted to the Department of Civil Engineering, AUST for having provided us with all facilities, which enabled us to carry out our thesis work.

Finally, we would like to thank Ms. Shahanaj Rahman, Deputy Director, Department of Environment for providing necessary data which was vital for this work. We would also like to express sincere thanks to all who have helped them by providing valuable suggestions and information throughout this work.

## ABSTRACT

With Bangladesh being ranked 1st as the country with the worst air quality in the world in 2021, air pollution has become one of the leading risk factors for mortality in our nation, its predominant sources being brick kilns, vehicle fumes and PM from construction sites. To combat air pollution, it is imperative to address the vehicular emission crisis by accurately quantifying the harmful pollutants and greenhouse gases released by motorized vehicles in Bangladesh and hence determine effective mitigation measures. The purpose of this research is to initiate the establishment of a suitable vehicular emission model for Bangladesh by checking the applicability of the European model for this country. This research aims to estimate the vehicular emission inventory for the last 6 years, compare the percent contribution of emission by each vehicle category, propose emission factors for each vehicle category running in Bangladesh and predict future emissions for the year 2025. Also, it goes without saying that the rapid increase in the number of vehicles that emit various types of harmful pollutants and GHG's in the form of exhaust fumes was causing a downward spiral for the air quality Bangladesh, until a seemingly deadlier problem struck the world and forced people to stay at home in fear. COVID-19 not only took thousands of lives but also the lockdown due to covid-19 adversely affected the economic, agricultural, industrial, educational and social sector immensely. However, every cloud has a silver lining. Due to the lockdown, there was a substantial decrease in vehicular emission. That being said, this research also aims to investigate the reduced quantity of vehicular emissions due to the covid-19 lockdown during 2020 and 2021. Using the European emission model COPERT 5.5, this study estimated and analyzed yearly emissions of 13 major pollutants by different vehicular classes in Bangladesh from 2016 to 2021 and compared the results of yearly total quantity of primary GHG i.e. CO<sub>2</sub> emission in the transport sector of Bangladesh against a similar study made by World Bank. Next, the study estimated the vehicular emissions of the years 2020 and 2021 two times; once by applying normal vehicular activity information before the lockdown and again by applying actual vehicular activity information that was found during the lockdown. Lastly, this study forecasted emissions for the year 2025 using expected vehicular stock and activity information.

**Keywords:** Air Pollution; Greenhouse Gases; Vehicular Emissions; Emission Model; COPERT 5.5;

# TABLE OF CONTENTS

|                                                                          | <b><u>Page</u></b> |
|--------------------------------------------------------------------------|--------------------|
| DECLARATION                                                              | iii                |
| ACKNOWLEDGEMENT                                                          | v                  |
| ABSTRACT                                                                 | vi                 |
| LIST OF TABLES                                                           | x                  |
| LIST OF FIGURES                                                          | xii                |
| LIST OF ABBREVIATIONS                                                    | xv                 |
| CHAPTER 1 INTRODUCTION                                                   | 1-5                |
| 1.1 General                                                              | 1                  |
| 1.2 Significance of the Study                                            | 2                  |
| 1.3 Objective of the Study                                               | 4                  |
| 1.4 Scope of the Study                                                   | 4                  |
| 1.5 Organization of the Study                                            | 5                  |
| 1.6 Overview                                                             | 5                  |
| CHAPTER 2 LITERATURE REVIEW                                              | 6-23               |
| 2.1 General                                                              | 6                  |
| 2.2 Distribution of Vehicle Fleet                                        | 6                  |
| 2.3 About COPERT                                                         | 7                  |
| 2.4 Effect of Different Factors on Developing Emission Inventory         | 8                  |
| 2.4.1 Climate Change                                                     | 8                  |
| 2.4.2 Emission Degradation Correction Factors                            | 11                 |
| 2.4.3 Vehicle Age                                                        | 11                 |
| 2.4.4 Specific Emission Factor                                           | 13                 |
| 2.5 Review of Vehicular Exhaust Emissions Related Studies                | 14                 |
| 2.6 Review on COPERT Emission Inventory Based Studies                    | 16                 |
| 2.7 Some Other Emission Inventory Used for Vehicular Emission Estimation | 21                 |
| 2.7.1 The Comprehensive Modal Emissions Model (CMEM)                     | 21                 |
| 2.7.2 MOBILE6 Model                                                      | 22                 |
| 2.7.3 International Vehicle Emissions (IVE) Model                        | 22                 |
| 2.7.4 MOtor Vehicle Emission Simulator (MOVES)                           | 23                 |

|                                    |                                                                                                                               |        |
|------------------------------------|-------------------------------------------------------------------------------------------------------------------------------|--------|
| 2.8                                | Overview                                                                                                                      | 23     |
| CHAPTER 3 METHODOLOGY OF THE STUDY |                                                                                                                               | 24-31  |
| 3.1                                | General                                                                                                                       | 24     |
| 3.2                                | Calculation Method                                                                                                            | 25     |
| 3.2.1                              | Choice of Method                                                                                                              | 25     |
| 3.2.2                              | Tier 3 Method                                                                                                                 | 25     |
| 3.2.3                              | Algorithm                                                                                                                     | 25     |
| 3.3                                | Hot Emissions                                                                                                                 | 27     |
| 3.4                                | Cold-Start Emissions                                                                                                          | 28     |
| CHAPTER 4 DATA COLLECTION          |                                                                                                                               | 32-59  |
| 4.1                                | Introduction                                                                                                                  | 32     |
| 4.2                                | Vehicle Classification and Stock Number                                                                                       | 32     |
| 4.2.1                              | Number of Motorized Vehicles Registered in Bangladesh throughout the Years                                                    | 32     |
| 4.2.2                              | Prediction of Number of Motorized Vehicles Registered in Bangladesh for the Year 2025                                         | 40     |
| 4.3                                | Breakdown of Stock into Fuel Type                                                                                             | 41     |
| 4.4                                | Breakdown of Stock into Technology Type                                                                                       | 41     |
| 4.5                                | Matching Vehicle Classifications from BRTA and RHD with Equivalent COPERT 5.5 Classification                                  | 44     |
| 4.6                                | Mileage and Activity Information                                                                                              | 45     |
| 4.7                                | Change in Mileage and Activity Information Due to Lockdown                                                                    | 47     |
| 4.8                                | Fuel Characteristics                                                                                                          | 48     |
| 4.9                                | Environmental Information                                                                                                     | 48     |
| 4.9.1                              | Environmental Information from the Year 2016 to 2021                                                                          | 48     |
| 4.9.2                              | Expected Environmental Information for the Year 2025                                                                          | 56     |
| 4.10                               | Collection of CO <sub>2</sub> Emission Data from Other Studies                                                                | 58     |
| 4.11                               | Collection of Emission Factors for Bangladesh from Other Sources to Compare with the Emission Factors Generated by COPERT 5.5 | 59     |
| CHAPTER 5 RESULTS AND ANALYSIS     |                                                                                                                               | 60-122 |
| 5.1                                | Introduction                                                                                                                  | 60     |
| 5.2                                | Emission Factors Generated by COPERT 5.5                                                                                      | 60     |
| 5.3                                | Emission Inventories                                                                                                          | 66     |
| 5.3.1                              | Emission Inventory for the Year 2016                                                                                          | 67     |

|                                           |                                                                                 |         |
|-------------------------------------------|---------------------------------------------------------------------------------|---------|
| 5.3.2                                     | Emission Inventory for the Year 2017                                            | 71      |
| 5.3.3                                     | Emission Inventory for the Year 2018                                            | 75      |
| 5.3.4                                     | Comparison between COPERT Results and World Bank Data                           | 79      |
| 5.3.5                                     | Emission Inventory for the Year 2019                                            | 80      |
| 5.3.6                                     | Emission Inventory for the Year 2020                                            | 84      |
| 5.3.7                                     | Emission Inventory for the Year 2021                                            | 88      |
| 5.4                                       | Analysis of the Reduction in Emission due to Covid-19 Lockdown                  | 91      |
| 5.5                                       | Comparative Analysis of Emission Characteristics of Different Types of Vehicles | 107     |
| 5.6                                       | Prediction for the Year 2025                                                    | 121     |
| CHAPTER 6 CONCLUSIONS AND RECOMMENDATIONS |                                                                                 | 123-125 |
| REFERENCES                                |                                                                                 | 126-130 |

## LIST OF TABLES

|            |                                                                                                                                | <b><u>Page</u></b> |
|------------|--------------------------------------------------------------------------------------------------------------------------------|--------------------|
| Table 2.1  | Types of RHD vehicle fleet in Bangladesh                                                                                       | 7                  |
| Table 3.1  | Reduction factors ( $bc_{i,k}$ ) for post-Euro 1 petrol vehicles (relative to Euro 1)                                          | 29                 |
| Table 4.1  | Number of motor vehicles registered in Bangladesh from up to 2010 to 2021                                                      | 33                 |
| Table 4.2  | Number of motor vehicles registered in Bangladesh from up to 1988 to 2009                                                      | 34                 |
| Table 4.3  | Number of motor vehicles registered in the year 2010                                                                           | 35                 |
| Table 4.4  | Calculation of average ratio of Jeep and Microbus observed during 2011-2021                                                    | 36                 |
| Table 4.5  | Breakdown of Jeep and Micro (Total) into corresponding Jeep and Microbus                                                       | 37                 |
| Table 4.6  | Number of registered vehicles from 1989 to 2010                                                                                | 38                 |
| Table 4.7  | Yearly rate of increase in number of vehicles registered in Bangladesh                                                         | 40                 |
| Table 4.8  | Fuel split in Dhaka found from a previous study                                                                                | 41                 |
| Table 4.9  | Timeline of implementation of different Euro standards in Europe                                                               | 42                 |
| Table 4.10 | COPERT 5.5 classifications equivalent to BRTA and RHD classifications                                                          | 44                 |
| Table 4.11 | Annual mileage and average speed of different vehicle from RUC Report                                                          | 45                 |
| Table 4.12 | Decrease in mileage per year for different RHD vehicle categories                                                              | 46                 |
| Table 4.13 | Decrease in average speed per year for different RHD vehicle categories                                                        | 46                 |
| Table 4.14 | Monthly maximum and minimum temperature and humidity for Bangladesh for the year 2021                                          | 48                 |
| Table 4.15 | Monthly maximum and minimum temperature and humidity for Bangladesh from the year 2016 to 2020                                 | 49                 |
| Table 4.16 | Calculation of average yearly dew point and approximate $R_h$ for 2025                                                         | 57                 |
| Table 4.17 | Expected environmental information in Bangladesh for the year 2025                                                             | 57                 |
| Table 4.18 | Emission factor for $CO_2$ from the BAPS report                                                                                | 59                 |
| Table 5.1  | Emission factors generated by COPERT 5.5                                                                                       | 61                 |
| Table 5.2  | Comparison between emission factors generated by COPERT 5.5 and emission factors from the recent most study done in Bangladesh | 65                 |
| Table 5.3  | Emission inventory for the year 2016                                                                                           | 67                 |
| Table 5.4  | Emission inventory for the year 2017                                                                                           | 71                 |

|            |                                                                          |     |
|------------|--------------------------------------------------------------------------|-----|
| Table 5.5  | Emission inventory for the year 2018                                     | 75  |
| Table 5.6  | Emission inventory for the year 2019                                     | 80  |
| Table 5.7  | Emission inventory for the year 2020                                     | 84  |
| Table 5.8  | Emission inventory for the year 2021                                     | 88  |
| Table 5.9  | Emission inventory for 2020 if lockdown due to covid-19 had not occurred | 92  |
| Table 5.10 | Emission inventory for 2021 if lockdown due to covid-19 had not occurred | 93  |
| Table 5.11 | Total predicted emissions in 2025                                        | 121 |

## LIST OF FIGURES

|             | <b><u>Page</u></b> |
|-------------|--------------------|
| Figure 2.1  | 10                 |
| Figure 2.2  | 12                 |
| Figure 2.3  | 12                 |
| Figure 2.4  | 15                 |
| Figure 2.5  | 17                 |
| Figure 2.6  | 19                 |
| Figure 2.7  | 20                 |
| Figure 2.8  | 21                 |
| Figure 3.1  | 27                 |
| Figure 4.1  | 59                 |
| Figure 5.1  | 68                 |
| Figure 5.2  | 72                 |
| Figure 5.3  | 76                 |
| Figure 5.4  | 79                 |
| Figure 5.5  | 81                 |
| Figure 5.6  | 85                 |
| Figure 5.7  | 89                 |
| Figure 5.8  | 95                 |
| Figure 5.9  | 95                 |
| Figure 5.10 | 96                 |
| Figure 5.11 | 96                 |
| Figure 5.12 | 97                 |
| Figure 5.13 | 97                 |
| Figure 5.14 | 98                 |

|             |                                                                                         |     |
|-------------|-----------------------------------------------------------------------------------------|-----|
| Figure 5.15 | Graphical representation of decrease in total NO <sub>x</sub> emission due to lockdown  | 98  |
| Figure 5.16 | Possible yearly trend of SO <sub>2</sub> emission if lockdown had not occurred          | 99  |
| Figure 5.17 | Graphical representation of decrease in total SO <sub>2</sub> emission due to lockdown  | 99  |
| Figure 5.18 | Possible yearly trend of PM 10 emission if lockdown had not occurred                    | 100 |
| Figure 5.19 | Graphical representation of decrease in total PM 10 emission due to lockdown            | 100 |
| Figure 5.20 | Possible yearly trend of PM 2.5 emission if lockdown had not occurred                   | 101 |
| Figure 5.21 | Graphical representation of decrease in total PM 2.5 emission due to lockdown           | 101 |
| Figure 5.22 | Possible yearly trend of NO <sub>2</sub> emission if lockdown had not occurred          | 102 |
| Figure 5.23 | Graphical representation of decrease in total NO <sub>2</sub> emission due to lockdown  | 102 |
| Figure 5.24 | Possible yearly trend of N <sub>2</sub> O emission if lockdown had not occurred         | 103 |
| Figure 5.25 | Graphical representation of decrease in total N <sub>2</sub> O emission due to lockdown | 103 |
| Figure 5.26 | Possible yearly trend of NH <sub>3</sub> emission if lockdown had not occurred          | 104 |
| Figure 5.27 | Graphical representation of decrease in total NH <sub>3</sub> emission due to lockdown  | 104 |
| Figure 5.28 | Possible yearly trend of NO emission if lockdown had not occurred                       | 105 |
| Figure 5.29 | Graphical representation of decrease in total NO emission due to lockdown               | 105 |
| Figure 5.30 | Possible yearly trend of VOC emission if lockdown had not occurred                      | 106 |
| Figure 5.31 | Graphical representation of decrease in total VOC emission due to lockdown              | 106 |
| Figure 5.32 | Possible yearly trend of NMVOC emission if lockdown had not occurred                    | 107 |
| Figure 5.33 | Graphical representation of decrease in total NMVOC emission due to lockdown            | 107 |
| Figure 5.34 | Contribution of vehicles to the emission of CO <sub>2</sub> throughout the years        | 108 |
| Figure 5.35 | Contribution of vehicles to the emission of CO throughout the years                     | 109 |
| Figure 5.36 | Contribution of vehicles to the emission of CH <sub>4</sub> throughout the years        | 110 |
| Figure 5.37 | Contribution of vehicles to the emission of NO <sub>x</sub> throughout the years        | 111 |
| Figure 5.38 | Contribution of vehicles to the emission of SO <sub>2</sub> throughout the years        | 112 |
| Figure 5.39 | Contribution of vehicles to the emission of PM 10 throughout the years                  | 113 |

|             |                                                                                               |     |
|-------------|-----------------------------------------------------------------------------------------------|-----|
| Figure 5.40 | Contribution of vehicles to the emission of PM 2.5 throughout the years                       | 114 |
| Figure 5.41 | Contribution of vehicles to the emission of NO <sub>2</sub> throughout the years              | 115 |
| Figure 5.42 | Contribution of vehicles to the emission of N <sub>2</sub> O throughout the years             | 116 |
| Figure 5.43 | Contribution of vehicles to the emission of NH <sub>3</sub> throughout the years              | 117 |
| Figure 5.44 | Contribution of vehicles to the emission of NO throughout the years                           | 118 |
| Figure 5.45 | Contribution of vehicles to the emission of VOC throughout the years                          | 119 |
| Figure 5.46 | Contribution of vehicles to the emission of NMVOC throughout the years                        | 120 |
| Figure 5.47 | Emission of primary GHG Carbon Dioxide throughout the years and predicted emission up to 2025 | 121 |
| Figure 5.48 | Emission of other major pollutants throughout the years and predicted emission up to 2025     | 122 |

## **LIST OF ABBREVIATIONS**

|                  |                                                          |
|------------------|----------------------------------------------------------|
| BRTA             | Bangladesh Road Transport Authority                      |
| CH <sub>4</sub>  | Methane                                                  |
| CMEM             | Comprehensive Modal Emissions Model                      |
| CNG              | Compressed Natural Gas                                   |
| CO               | Carbon Monoxide                                          |
| CO <sub>2</sub>  | Carbon Dioxide                                           |
| COPERT           | Computer Program to Estimate Emissions from Road Traffic |
| DOE              | Department of Environment                                |
| DScE             | Dhaka School of Economics                                |
| EC               | Elemental Carbon                                         |
| EEC              | European Environment Agency                              |
| EF               | Emission Factor                                          |
| EPA              | Environment Protection Agency                            |
| EU               | European Union                                           |
| GHG              | Greenhouse Gas                                           |
| HC               | Hydro Carbon                                             |
| HDV              | Heavy Duty Vehicles                                      |
| IPCC             | Intergovernmental Panel on Climate Change                |
| IVE              | International Vehicle Emissions                          |
| km/hr            | Kilometer Per Hour                                       |
| LDT              | Light Duty Trucks                                        |
| LDV              | Light Duty Vehicles                                      |
| LGED             | Local Government Engineering Department                  |
| LGV              | Large Goods Vehicle                                      |
| MOVES            | Motor Vehicle Emission Simulator                         |
| N <sub>2</sub> O | Nitrous Oxide                                            |
| NH <sub>3</sub>  | Ammonia                                                  |
| NMVOC            | Non-Methane Volatile Organic Compound                    |
| NO               | Nitrogen Monoxide                                        |
| NO <sub>2</sub>  | Nitrogen Dioxide                                         |
| NO <sub>x</sub>  | Nitrogen Oxides                                          |

|                 |                                                                        |
|-----------------|------------------------------------------------------------------------|
| OC              | Organic Carbon                                                         |
| PAH             | Polycyclic Aromatic Hydrocarbons                                       |
| PEM             | Portable Emission Measurement system                                   |
| PM 10           | Particulate Matter with an aerodynamic diameter of 10 microns or less  |
| PM 2.5          | Particulate Matter with an aerodynamic diameter of 2.5 microns or less |
| RHD             | Roads and Highways Departments                                         |
| RUC             | Road User Cost                                                         |
| SO <sub>2</sub> | Sulfur Dioxide                                                         |
| STP             | Strategic Transport Planning                                           |
| SUV             | Sport Utility Vehicles                                                 |
| VOC             | Volatile Organic Compound                                              |

# CHAPTER 1

## INTRODUCTION

### 1.1 General

The economic growth of all countries is greatly influenced by road transportation, making it one of the primary principles of a country's standard of living. Nonetheless, it indicates a slew of negative societal consequences: pollution, noise, accidents, and so on. The transportation sector is the leading cause of air pollution in urban areas. It is the root cause of many problems with the air quality in the area, including high levels of benzene and carbon monoxide in the atmosphere, as well as the generation of photochemical smog. The consistent adoption of innovative emission regulations, the majority of which have been geared at lowering the amount of pollutant emissions produced by automobiles, has had a discernible and significant bearing on the recent pollution growth. On the other hand, thanks to the collaboration of automobile manufacturers, energy companies and national administrative agencies, local emissions have been cut down by a substantial amount. CO<sub>2</sub> emissions are a global pollutant that is produced as a consequence of the use of fossil fuels. Contradictorily, the percentage of contemporary automobiles, which are more fuel-efficient, has been steadily increasing over the last several decades. This has not yet been sufficient to restrict the emission of CO<sub>2</sub> gas. This is connected to the vast and continuous increase in mobility that has been taking place.

Road transport also contributes significantly to global warming due to carbon dioxide and other greenhouse gas emissions. As the world's growing economies and developed countries, such as Asia and Europe, increasingly rely on motorized transportation, it's reasonable to expect that already-high levels of air pollution will only deteriorate in the future. All of the above facts demonstrate the need for reliable air pollution simulations in such scenarios as local impact on environmental assessments, urban and regional air quality studies, national emission estimates, and forecasts for the future. As a result, reliable motor vehicle emission models may become more important for the development and assessment of air pollution management plans. As a conclusion of this research, a suggested integrated system for air quality and traffic planning has been developed. This system is designed to meet the requirements of the majority of organizations and people that operate in both of

these domains. The Computer Program to Estimate Emissions from Road Traffic (COPERT), which is used throughout Europe as well as 28 other countries, serves as the foundation for this approach.

The significant growth in the number of cars on Bangladesh's metropolitan highways, notably gasoline and diesel vehicles, has resulted in increased traffic congestion and air pollution concerns. With the growth of the urban economy in Bangladesh, carbon emissions from automobile emissions have risen to the point that it has become a severe environmental concern with several adverse effects on human health. The first step in attempting to halt this ongoing damage and detriment to our environment is to conduct quantitative and qualitative analyses of the emissions produced by various automobiles used by individuals in order to bring it to their attention and warn them about using a model of car or type of fuel that generates more emissions than others. As a result, individuals may convert to alternative energy sources or means of transportation to positively influence this problem on an individual scale. This thesis aims to build in Bangladesh an approach that is often utilized in European nations. A modified strategy for emission profiles with high geographical and temporal resolution based on the same methodology is also described along with specific case studies. This paper also discusses a strategy for producing trustworthy emission projections and shows a variety of findings from relevant applications. Separately, the remaining uncertainties in car emission models are described. The approaches that have been created have been outlined in previous articles and studies. The findings of the model's use for predicting emissions for Bangladesh are the major focus of this research.

## **1.2 Significance of the Study**

For the last few years, the Global Livability Report has ranked Dhaka as one of the world's least livable cities, while Bangladesh was ranked 146th in the Human Development Index in 2011. These poor rankings may be attributed to a combination of factors, including traffic congestion and air pollution (Asian Development Bank, 2012). A wide range of issues, including excessive traffic congestion, insufficient public transit, a lack of pedestrian comforts and safety issues, and increasing levels of air pollution (World Bank, 2009), characterizes the transportation conditions in Dhaka. Estimated emissions are beneficial for improving emission control methods,

determining the suitability of licensing and control programs, determining the impacts of sources and adequate ways to mitigate, and a variety of other application areas by a wide range of users, including national, state, and local departments, consultants, and industry. A statistical result from different source-specific emission trials or continuous emission monitoring is often chosen for estimating a source's emissions since they give the most accurate depiction of the emissions of the tested source. However, testing data from specific links are not always accessible, and even when they are, they may not accurately represent the variation of absolute emissions over time. Despite their limitations, emission factors are usually the best or only approach available for measuring emissions. Around 15% of total CO<sub>2</sub> emissions are generated from Bangladesh's transportation sector. Bangladesh contributes 0.21% share of global CO<sub>2</sub> emission (Worldometer, 2022). When we analyze the road public transport sector, which is a key source of greenhouse gas emissions. Emissions from gasoline and diesel fuel use may be divided into two categories. Emissions from motor vehicles are caused mainly by gasoline combustion, the primary fuel used in them. Volatile fuels and lubricants may also lead to evaporation and loss of moisture. The emphasis of this research is on emissions caused by combustion. However, driving a car has many negative consequences including fatalities, road damage, poor air quality, congestion, and dependence on fuel.

The transportation sector is critical in calculating a metropolitan area's footprint. Every day, a large number of automobiles drive through the city. They use a lot of fossil fuels. When these fuels are used in the chambers of these cars, they emit a large quantity of CO<sub>2</sub> into the atmosphere on a regular basis. So, in order to mitigate the effects of the increased CO<sub>2</sub> in the air, we must implement certain measures that could also extract this additional CO<sub>2</sub> from the atmosphere.

Several variables impact the emission inventory of gasoline cars, including environmental parameters, vehicle circumstances, fuel specifications, traffic conditions and so on. There are several emission models from all around the globe that were established based on a certain element or mix of these variables to quantify different kinds of emissions. Our goal is to utilize COPERT 5.5 to determine if it is a suitable emission model for Bangladesh.

### **1.3 Objective of the Study**

This research aimed to estimate pollutant emissions produced by vehicles in Bangladesh between 2016 and 2021. The information gathered from the study will be used to accomplish five goals:

1. First of all, this study will provide a clear and thorough picture of the existing situation of vehicular emissions from 2016 up to now.
2. Secondly, the study's findings are designed to serve as a foundation for making policy decisions that ensure increased mobility while reducing greenhouse gas emissions.
3. Thirdly, this study aims to suggest current emission factors for different vehicle types in Bangladesh.
4. Then, this research's outcomes will help show the silver lining of COVID lockdown reduced vehicular emission.
5. Finally, a scenario will be developed based on the study's results to guide further research into Bangladesh's emissions.

### **1.4 Scope of the Study**

The research will only analyze and estimate the rate of vehicular emission in Bangladesh during the past six years, as well as project a clear picture for future years. This comprehensive study contains registered vehicle numbers, speed and annual kilometer driven. The study's data is mostly based on information acquired from journal sources and various governmental or non-governmental departments such as LGED, BRTA, World Bank and so on. Newspapers do not just publish total GHG emissions and environmental effects from vehicular emissions in order to inform people about engineering analyses. Some information is not accessible because data collecting formats need high-quality equipment and an effective technical framework which are not yet fully established in Bangladesh. It seems that government agencies have a range of data that they would have anticipated or are still using the older data for future work. This research separates the deficiencies and attempts to address them in the best conceivable manner.

## **1.5 Organization of the Study**

This research-based study includes an overview of the project, previous research projects, a comprehensive method and justification for the study project, data collection and data analysis, a description of the study findings and their significance, and finally, the study concludes with possible recommendations and future work based on the findings. Therefore the thesis is categorized into six different chapters.

Chapter 1: The first chapter represents the overview of the full thesis and provides the basic foundation of the study. It also presents the background, significance, scope, and objective of this study.

Chapter 2: In this chapter, previous literature on this subject has been reviewed. This review summarizes the previous research, overview of emissions from the vehicle, and causes of vehicular emission.

Chapter 3: This chapter discusses the system's theoretical and analytical components, as well as research design and methodology in Bangladesh. The inventory of emission models and their components is described in this chapter.

Chapter 4: The fourth chapter provides an overview of the data collection method in the studied area and processes those data according to the methodology that has been followed throughout the research work.

Chapter 5: The total vehicle emission is shown in Chapter 5. The proportion of total emissions is investigated by vehicle type, year, pollutants, and other factors. Different cross-classifications of emissions were explored in an attempt to uncover variables.

Chapter 6: This chapter presents the study's key findings, conclusions, and discussion of the findings. This chapter also discusses limitations and recommendations for future research.

## **1.6 Overview**

A general statement of the research effort has been presented in this chapter. The current state of the transportation system of Bangladesh as well as the scope of the issue has been addressed. The goal of the study and the purpose of this research project have also been identified. Finally, the structure of the thesis documentation work has been presented.

## **CHAPTER 2**

# **LITERATURE REVIEW**

### **2.1 General**

Detailed literature research is conducted in order to get a fundamental understanding and knowledge of emissions from the transport sector and transportation systems of a modernized, efficient, and sustainable country as a whole, as well as the general description of emissions from the transportation sector. This chapter contains a quick description of that evaluation. Finally, a summary of previous research works on combustion procedure, stock configuration, vehicle activity parameter, vehicular fleet management and distribution in Bangladesh conducted by different governmental departments, weather properties, and emission estimation methodology using software named COPERT is discussed in this chapter, along with relevant research approaches, findings, and discussion on those works.

Estimation of emissions from vehicles requires so much information for a better outcome. This research review aims to help people comprehend the connection between transportation, personal travel habits, and climate change. It draws on data from a variety of sources, not all of which are directly related to climate change or transportation.

### **2.2 Distribution of Vehicle Fleet**

Bangladesh Road Transport Authority (BRTA) collects registration data for the country's motorized vehicle fleet. According to BRTA, about 2984200 vehicles were registered in 2016-2017 (RHD, 2017). The utilization tables also showed that, with the exception of Utility and Motorcycles, each vehicle mileage traveled (kilometers) has decreased significantly over the previous 12 years, but the average number of hours traveled per vehicle has grown. As a result, compared to the RUC research conducted in 2004-05, the speed limit of various vehicle types decreased in 2016-17. In 2017, the average speed range for buses traveling on RHD national roads was 36 to 37 kilometers per hour, while in 2004-2005, the average speed range for these vehicles was 42 to 45 kilometers per hour. A commercial freight vehicle's speed restriction of 30 km/hr on the RHD network in 2017 compared to 41 km/hr in 2004-

05 was a significant decrease. When comparing the number of registered vehicles between 2004-05 and 2016-17, it is obvious that the majority of vehicle categories have seen significant growth. Although individual vehicle distances are reduced, the overall vehicle-km traveled by all vehicles on the roads and highways network is increased (RHD, 2017). According to the Roads and Highways Department (RHD) of Bangladesh, there is a wide range of vehicle fleets in Bangladesh. As a result, the RHD has created a categorizing system of motorized and non-motorized vehicles, which was primarily designed for traffic considerations as shown in Table 2.1.

Table 2.1: Types of RHD vehicle fleet in Bangladesh (Source: RHD, 2001)

|                       | RHD Vehicle Category | Description                                                                                                              |
|-----------------------|----------------------|--------------------------------------------------------------------------------------------------------------------------|
| Motorized Vehicle     | 1. Heavy Truck       | There are 3 or more axles. Tandem trucks with many axles, container carriers, and other articulated trucks are examples. |
|                       | 2. Medium Truck      | 2 axle rigid trucks with a payload of 3 tonnes including tractors and trailers for agriculture                           |
|                       | 3. Small Truck       | 2 axles are rigid with a payload range of 3 tonnes                                                                       |
|                       | 4. Large Bus         | Greater than 40 seats and 36 chassis                                                                                     |
|                       | 5. Small Bus         | Less than 40 seats and 36 chassis.                                                                                       |
|                       | 6. Mini Bus          | 16 to 39 seats and less than 36 chassis.                                                                                 |
|                       | 7. Micro Bus         | Up to 16 seats                                                                                                           |
|                       | 8. Utility           | Jeeps, pick-ups, and four-wheel-drive vehicles                                                                           |
|                       | 9. Car               | Cars and taxis of all sorts                                                                                              |
|                       | 10. Motor Cycle      | All motorized 2-wheeled vehicles                                                                                         |
|                       | 11. Auto Rickshaw    | Vehicles with three wheels including Baby taxis                                                                          |
|                       | 12. Tempo            | Auto Tempo/Van with a large passenger and load capacity                                                                  |
| Non-motorized Vehicle | 13. Cycle Rickshaw   | Non-motorized 3-wheel passenger vehicle                                                                                  |
|                       | 14. Rickshaw Van     | Non-motorized 3-wheel cargo vehicle                                                                                      |
|                       | 15. Cart             | Different types of carts                                                                                                 |
|                       | 16. Bicycle          | All 2-wheel pedal cycles                                                                                                 |

## 2.3 About COPERT

COPERT is the European Union's (EU) standardized vehicle emissions calculator. It evaluates emissions and fuel consumption for a certain nation or area based on vehicle number, traveling distance, speed limit and other parameters like ambient temperature and humidity. COPERT is a Microsoft Windows application that calculates air

pollution emissions from vehicle traffic. The European Environment Agency (EEA) funds COPERT's technical development as part of the operations of the European Topic Centre on Air and Climate Change. Since 2007, the European Commission's Joint Research Center supervised the model's scientific development. COPERT was designed in concept for National Experts to use in estimating greenhouse gases from road transport for inclusion in official yearly national inventories. Road transportation emissions may be computed using a software program, which provides a more open method of determining the emissions and a uniform data collection and reporting approach, resulting in consistent and comparable results in conformity with international agreements and protocols as well as EU regulations

Also, COPERT is:

- Globally accepted – several European nations use it to publish official emissions statistics.
- A research tool for calculating emissions on a national, regional, or local scale, with estimates ranging from annually to daily.
- COPERT's methodology is documented and peer-reviewed by UNECE LRTAP Convention specialists, making it technologically sophisticated and transparent.
- All major pollutants are included, including greenhouse gases, air pollutants, and hazardous species. (Source: EMISIA)

## **2.4 Effect of Different Factors on Developing Emission Inventory**

### **2.4.1 Climate Change**

Vehicular emission greatly depends on the weather condition surrounding the vehicle. That is why country-specific data like monthly average temperature and relative humidity are very important for estimating emissions from the vehicle as emission is directly affected by temperature and relative humidity. Global warming is no longer a future phenomenon but rather an existing one. Climate change is defined by the Intergovernmental Panel on Climate Change (IPCC) as an adjustment in the mean and variability of the climate's features that can be characterized statistically. As a result of climate change, Bangladesh is among the most vulnerable nations (Harmeling, 2008).

### ***Temperature***

The emission factor is directly affected by ambient temperature. Because the temperature fluctuates during the day, fuel losses may occur. According to COPERT, HOT emissions from vehicles increase with the increase in ambient temperature. Emissions are greater in this phase and are highly dependent on environmental circumstances. Cold-start pushes emission zeroes as the vehicle warms up, leaving only hot emissions. On the other hand, COLD emissions from vehicles increase with decreasing temperature.

Previously Basak et al. (2013) conducted research on temperature change. The article assesses climate change and variability based on a study of historical temperature and rainfall data gathered at 34 meteorological stations throughout seven Bangladeshi areas from 1976 to 2008. A 0.0186°C annual rise in the average maximum temperature, whereas a yearly 0.0152°C rise, has been noted for the average minimum temperature. All months except January and April exhibited a rising monthly average maximum temperature trend. The upward tendency was especially noticeable from May through September and February. Except for January and November, every average monthly minimum temperature record indicated rising tendencies.

These findings are significant for estimating the emissions of Bangladesh because the annual emission rate is significantly influenced by temperature. Although this study was done in 2013 for the years 1976 to 2008, this temperature increase may not be fully justified in recent years because changing temperature depends on many factors whose are change year by year. It is also a fact that this type of research is not done frequently in Bangladesh. And since the changing temperature rate is not that large, this observation may be used to predict the temperature in the future.

### ***Humidity***

Choi et al. (2010) conducted research on the impact of temperature and humidity on emissions. The study showed that in terms of humidity sensitivity, HC and CO was affected at temperatures over 75 degrees Fahrenheit. In contrast, NO<sub>x</sub> was affected at temperatures exceeding 25 degrees Fahrenheit, with increased sensitivity as relative humidity rises. The humidity sensitivity of gasoline automobiles was higher than that of diesel vehicles. The findings also showed that overall PM<sub>2.5</sub> was unaffected by humidity variations in both petrol and diesel cars.

Because of the large number of input parameters and their interdependences, this paper focuses mainly on temperature and humidity, analyzing changes in emissions from changes in these parameters separately and comparing the consequence of each individual parameter on emission findings by measuring percent change in emissions. Mortuza et al. (2014) conducted a study on humidity and dew point temperature. Using data from 1961 to 2010, this study looked at seasonal and yearly trends in humidity and dew points in 15 vital locations in Bangladesh. The slopes of Sen's estimator were used to calculate the magnitude of the climate trends. The Mann–Kendall test was used to examine the statistical significance of the patterns.

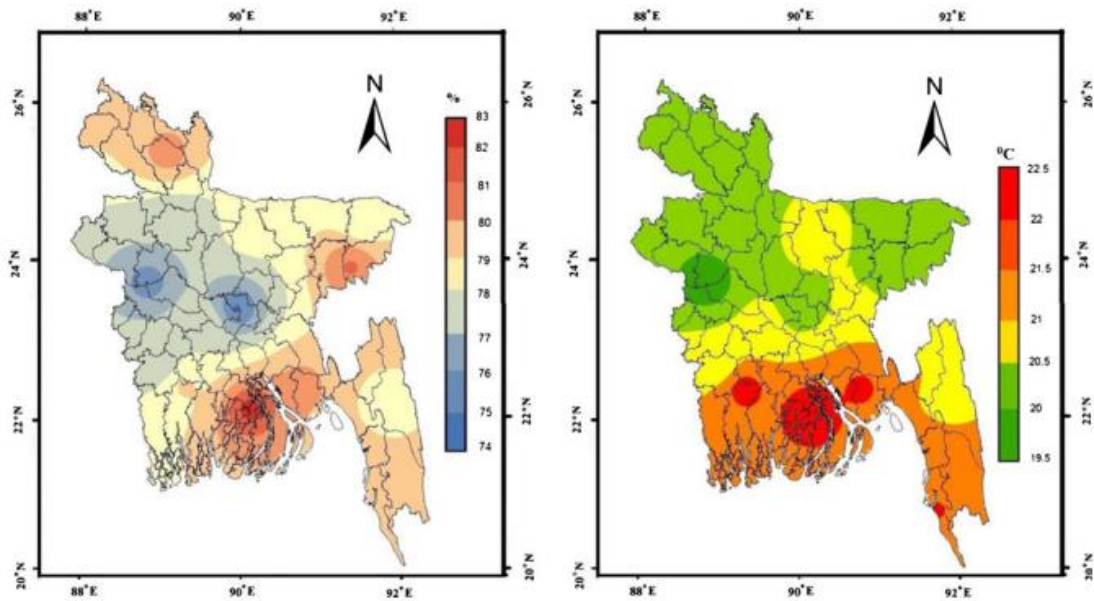

Figure 2.1: Spatial distribution of the mean annual relative humidity and dew point temperature over the period 1961–2010 (Source: Mortuza et al., 2014)

Allowing for a 95% confidence level, the study findings showed that the proportion of stations indicating a meaningful trend in relative humidity is mild but much greater in the dew point temperature series. On an annual, winter, and pre-monsoon scale, relative humidity in the western portion of the nation was growing at 0.53, 0.86, and 1.18 percent each decade, respectively. Significant negative patterns in relative humidity series could be seen during the monsoon season. On the other hand, neither the seasonal nor the annual dew point temperature time-series data at any site demonstrate any significant deterioration in their values. Again, the magnitude of the relevant trends was greater in the country's west. The major portions of the slopes are well above zero, showing that dew point temperatures in Bangladesh were rising on an annual and seasonal basis.

### **2.4.2 Emission Degradation Correction Factors**

Only petrol cars and LGVs are subject to emission degradation. It is also used exclusively to change emission factors for Euro 1-4 cars, with no degradation factors for Euro 5 and 6 vehicles. Degradation corrections are also not required for diesel vehicles or LGVs. As per COPERT methodology, the emission factor obtained from the speed-emission coefficients is multiplied by the degradation correction factor. The degradation factors grow with increasing mileage, but vehicles of Euro 1 and 2 have a certain limit, which is only up to a maximum of 120,000km. The same goes for Euro 3 and 4, which have a limit of 160,000km. The value of the adjustment factor supplied for these mileages remains constant at mileages above this. Using COPERT 5 coefficients, a linear equation is used to calculate a degradation adjustment factor for a given cumulative mileage. There is only one series of coefficients to utilize for all engine sizes in Euro 1 and 2 petrol automobiles. There is a range of coefficients for vehicles 1.4l and cars >1.4l in Euro 3 and 4 automobiles. For each of these vehicle classes, a set of coefficients is used to calculate a degradation factor for speeds less than 19 km/hr as well as another set for speeds more than 63 kph. A degradation factor is calculated using an interpolation approach for intermediate speeds. (Murrells, 2017)

### **2.4.3 Vehicle Age**

Previously Zachariadis et al. (2001) conducted a study on the influence of age on vehicular emission where relations among vehicle's age, mileage, and speed were shown. The study discussed the impact of motor vehicle aging and technology replacement on air emissions. To help with the inquiry, an existing model was used to look at the fleet dynamics and determine the emissions. The system's sensitivity to various ages and technical characteristics was investigated. The effects of deteriorating emissions, monitoring and control programs execution, and implementing alternative fuels were examined.

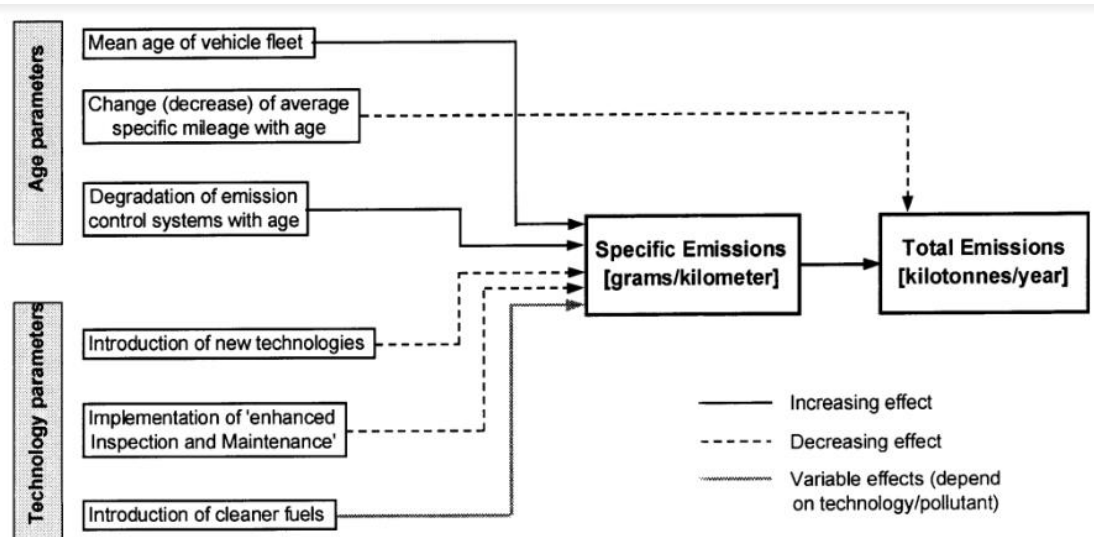

Figure 2.2: Overview of the parameter related to vehicle age and technology level that affect emissions (Source: Zachariadis et al., 2001)

Figure 2.2 shows age, technology, and vehicle emissions interdependencies. There are several pollution reduction alternatives that may be estimated by this model, which takes into consideration all characteristics of the vehicle stock's age and technology structure. The approach given here is advantageous due to its use in several countries and situations, the clarity of its built-in mathematical correlations, and its phenomenological approach. In this research, a graphical presentation was conducted between the mileage and age of vehicles.

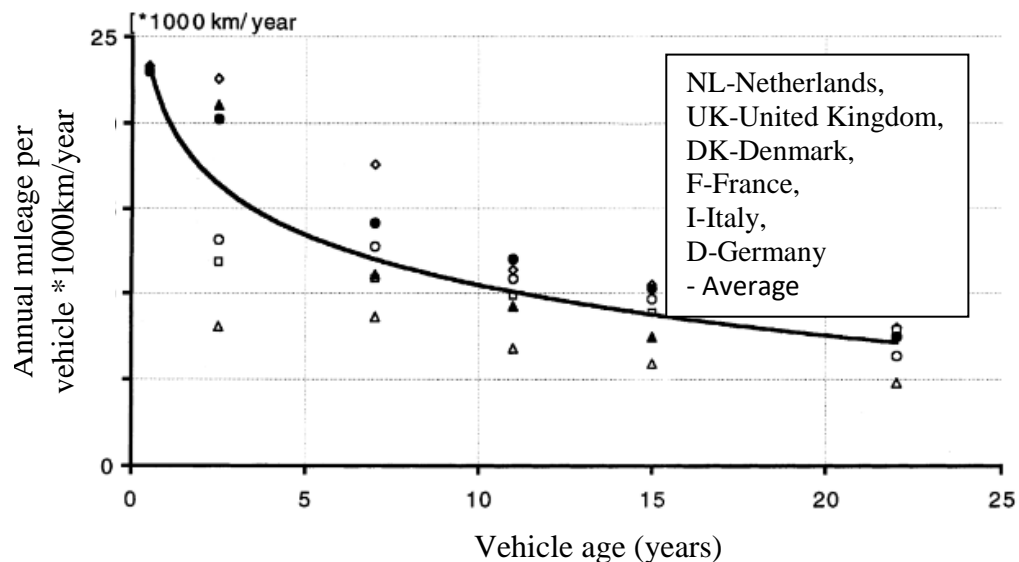

Figure 2.3: Six European nations' estimated mileage by vehicle age. (Source: Zachariadis et al., 2001)

Road traffic data in several nations demonstrate that when cars expand in size, they are driven less. Furthermore, the degradation of emissions control systems and the

aging of the catalytic converters of older vehicles are the primary causes of an apparent worsening in emissions behavior as vehicles age. These factors must also be taken into consideration in order to get accurate emission estimations.

#### **2.4.4 Specific Emission Factor**

An emission factor may be used to calculate the quantity of a pollutant that is emitted into the atmosphere as a function of a particular activity. It has long been the principal component for compiling local and national level emission inventories for air quality control and management decisions. The emission factor is also used for formulating emission control strategies. The emission factor relates to the vehicle activity and the amount of pollutants from the vehicle. Dividing the weight of a pollutant by the unit weight/volume/net duration of activity that is responsible for generating the pollutant is the general way to measure the emission factor for that particular pollutant. (Eastern Research Group, 2013)

$$\text{Emission} = \text{Activity} \times \text{Emission Factor} \times \% \text{ Reduction}$$

Generally, developed countries have their own emission factor for specific emission inventory. To establish a set of country-specific emission factors, there needs to be massive number of emission data sets and corresponding information. Maximum states in the European region have their country-specific emission factors. In Asian territory, it is very rare to find; especially in Asian subcontinent countries such as India, Bangladesh, and Pakistan have lack of necessary information to form a set of emission factors. A bottom-up inventory was developed for exhausted transportation emissions, keeping 5-10% uncertainty of vehicle age composition (Baidya and Borken-Kleefeld, 2009). This set of emission factors was generalized to South-East Asian countries. A project was undertaken in Pune, India to develop emission factors for the transportation sector and air quality monitoring facilities. They performed a constant mass emission test on different vehicle fleet for different speed ranges, formed a set of emission factors on fuel exhaustion and used it as a part of emission inventory development and emission source appointment studies (ICAP, 2007). In Bangladesh, a project was undertaken by DoE to develop an emission inventory where the study area was divided into two sections (Dhaka and Chittagong) and the Indian emission factor was used for estimating total emissions from the transportation sector (Randall et al., 2015) that Bangladesh does not have its own specific set of

emission factor which is becoming an obstacle to establishing obstacle to establish a perfect and accurate emission inventory.

## **2.5 Review of Vehicular Exhaust Emissions Related Studies**

Vehicle emissions are a major source of fine particles, according to various studies on pollution emissions (e.g., PM 2.5). 15 to 50 percent of the finer particulate mass is found in the developed region. Toxic compounds and inorganic ions make up the bulk of secondary particles in automotive exhaust emissions, followed by organic carbon (OC) and elemental carbon (EC).

Previously Haddad et al. (2009) conducted research on vehicular exhaust emissions in France, where a primary particulate organic characterization (PM 2.5 and PM 10) was discussed. The research highlighted that 70% of the aerosol mass was carbonaceous, and 60% of it was elemental carbon (EC). OC's water-soluble percentage and functionalization were characterized. It was necessary to collect data on a wide range of organic pollutants, and alkanes to construct a perfect emission profile for use in mass balance modeling. Low PAH concentrations and a high EC/OC ratio make the chemical profile similar to that of diesel emissions ( $\frac{EC}{OC} = 1.8$ ). These figures are in line with France's high percentage of diesel-powered vehicles (about 49 %). These findings imply that organic component profiles from the emission of vehicle's exhaustion are not impacted by geography and may be used in aerosol source apportionment models over large areas. This research doesn't provide a clear view of greenhouse gas emissions from vehicles and does not explain the effect of climate change on the national scale.

A similar kind of research was also done on vehicular exhaust emissions in Bangladesh. Iqbal, et al. (2013) conducted research in Dhaka city on the different types of vehicle using a Gas Analyzer. In This research, different types of vehicles were analyzed by the Flue Gas Analyzer and computed several types of toxic pollutants which are very harmful to both public health and the environment. The primary focus of this study is to discuss vehicle emission reduction technologies and methods. The deployment of CNG automobiles in Dhaka has reduced traffic congestion pollution. Dhaka's vehicle emissions exhibit significant levels of C, NO<sub>x</sub>, and SO<sub>x</sub>.

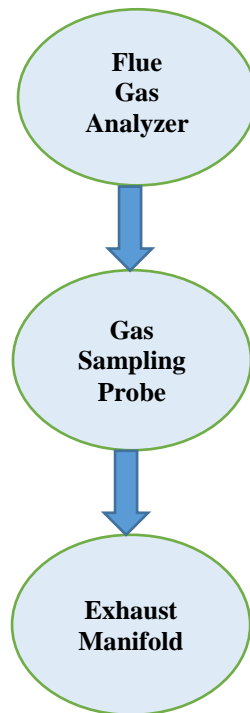

Figure 2.4: Experimental setup of the Flue Gas Analyzer (Source: Iqbal et al., 2013)

The internal combustion engines combust fuel in the presence of air and exhaust  $\text{CO}_2$ ,  $\text{H}_2\text{O}$ , and  $\text{N}_2$  as by-products.  $\text{CO}_2$  is released because of full combustion, which is a primary greenhouse gas that contributes to global warming. Pollutants such as  $\text{CO}_2$ ,  $\text{NO}_x$ ,  $\text{SO}_2$ , PM, and HC are also created as by-products of combustion processes.

The fundamental equation for the combustion of fuel is:

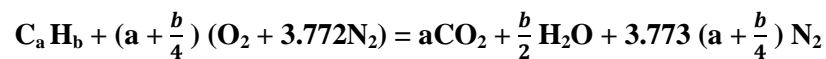

The findings of the research showed that diesel engine CO averages 50.66 ppm, which was close to normal air quality if measured for 20-25 minutes. Thus, petrol engines produced an average of 72.33 ppm and CNG 46 ppm. Production of  $\text{NO}_2$  averages 14.66 ppm in diesel engines.  $\text{NO}_2$  was minimal for gasoline and CNG. The diesel engine had 1 ppm  $\text{SO}_2$ ; others were insignificant. 1 ppm is insignificant for a gasoline engine. It was 75 ppm for CNG. The experiment revealed that Dhaka's car emissions are within Bangladesh's updated ambient air quality guidelines.

This research was only city-based and analyzed a limited number of cars. This research didn't show any emission standard which can be applicable throughout the country. There is another limitation in this research, and that is the duration of the analysis. The combustion analysis is done only for 20 to 25 minutes, and that is not sufficient for estimating or creating an emission inventory. However, this research

provides a clear knowledge about vehicular combustion and the exhaustion of pollutants.

## **2.6 Review on COPERT Emission Inventory-Based Studies**

Data from the country's vehicle fleet is provided into the COPERT model as inputs, which then calculates various metrics linked to the fleet, such as average speed and distance traveled by each vehicle, fuel consumption, emissions, and more. A study was conducted in Italy where the top-down methodology for estimating local emissions from vehicle transportation was the primary focus of this research (Saija et al., 2002). A bottom-up approach was beneficial when the data and information necessary for estimating approaches were accessible at the regional territorial level. Applying alternative variables, emissions were reduced to regional levels where there was no data available for the area. In order to effectively characterize local road transport emissions, this study stressed the need of strengthening the top-down strategy. A set of factors associated with transportation activities was used to define similar locations in the Italian region. It was decided to utilize the COPERT (Computer Program to Estimate Emissions from Road Traffic) technique to calculate the air emission levels for a variety of pollutants at each site, and the same approach was used to compute national road transport emissions.. The results are compared to those produced from a geographical decentralization of national surveys using simple surrogate variables defined by vehicle type and driving mode. This study was done by means of comparing between COPERT methodology and a new methodology for the betterment of urban emission inventory.

There was research before based on different emission inventories where COPERT methodology and MOVES methodology were discussed. Zachariadis et al. (1999) conducted research on motor vehicle emission estimation. This report detailed the history and current state of vehicular emission simulation in Europe. These studies led to the establishment of a set of computer-based models and methodologies that handle all motor vehicle emission concerns of relevance to policymakers, organizations, and the locomotive and oil sectors. COPERT approach for estimating road vehicle emissions was described and compared to other models. A COPERT-based technique for microscopic traffic emission estimation was defined and briefly reviewed in case

examples. This research aimed to share a clear strategy for building up an emission inventory.

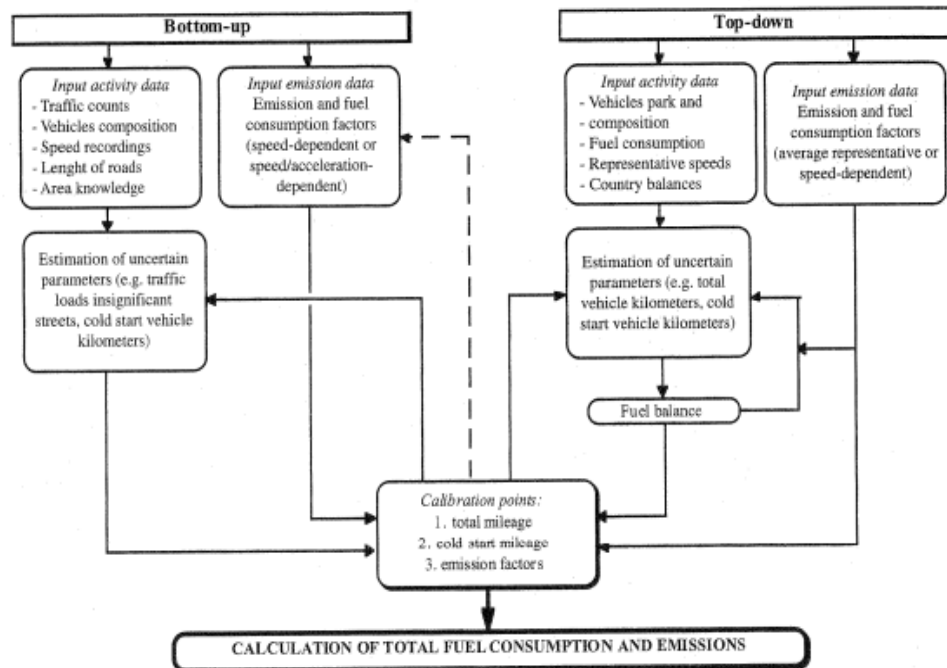

Figure 2.5: Different strategies to estimate traffic emission with a high spatial and temporal resolution. (Source: Zachariadis et al., 1999)

Figure 2.5 describe the process. In the bottom-up method, each street or road is considered a separate line source, and hourly vehicle emissions are estimated. Top-down simulations replicate the whole region yearly. The top-down strategy in this paradigm is COPERT. Top-down and bottom-up emissions estimations are independent. In each scenario, "hard facts" (such as traffic counts, car registration figures, and measured emission factors) are the starting point. Undefined parameters are then evaluated based on information and assumptions. The FOREMOVE model and the results gained from applying it in the European Auto/Oil project were presented to the audience. Finally, the crucial fields of automobile emissions research in Europe are listed.

Previously Burón et al. (2004) conducted a study on the estimation of road transportation emission in Spain where COPERT III was being used. This research presented the findings that looked at the emissions of pollutants caused by vehicle traffic in Spain during the years 1988 to 1999. The investigation had focused on two primary stages: the compilation of input data and the running of programs (COPERT III). The necessary models and algorithms have been built, and several assumptions have been established based on statistical criteria and the most recent research in the

field. They presented the COPERT III program with data, and that data became a result in and of itself, delivering solid assessments on many vehicles and other situation elements. The COPERT software version was too old, and so many functions were not introduced then. So it is possible not to show accurate results from the older version.

Then Guo et al. (2018) conducted a study of gasoline vehicle inventory based on the COPERT emission model. By using regional differences in gasoline vehicle emission inventories, this study aided in the compilation of a list of gasoline vehicles with a variety of regional differences. The related adjustment factors were established after thoroughly examining and assessing numerous aspects affecting vehicle emissions. The gasoline emission inventory of vehicles was created using the Zibo city's complete emission factor method. Using this approach, it is possible to generate a more accurate inventory of the emissions from gasoline-powered cars in different cities and provide theoretical background for gasoline vehicle emission control schemes. In this research, different inventory was analyzed and compared with each other to find the error percentage among those.

O'Driscoll et al. (2016) performed a research on a portable emissions measurement system (PEMS) utilizing the COPERT emission factor, where emissions of NO<sub>x</sub> and NO<sub>2</sub> from Euro 6 diesel passenger cars were measured. This research reported specific NO<sub>x</sub> and NO<sub>2</sub> emissions from a wide sample of Euro 6 diesel passenger vehicles. According to the results, the approval limit of NO<sub>x</sub> emissions was exceeded in this study by 1 to 22 times. The urban route section had more acceleration occurrences, which resulted in higher emissions. PEMS test results were found to be 1.6 times greater for NO<sub>x</sub> and 2.5 times greater for NO<sub>2</sub> when compared to the speed-dependent emissions factors of COPERT. This was discovered when the data from PEMS were compared to COPERT.

Another study was conducted by Condurat et al. (2017) on the environmental impact of road transport traffic. This article highlighted the ecological effect of road transportation traffic, as indicated in air pollutant emissions, for particular road networks in Romania's North-East Region. In connection to traffic pollution, the present study emphasized the exponential development of the greenhouse gas impact and fuel consumption, recommending particular measures for improving road network sustainability based on the study's findings. Environmental impact analysis necessitates a quantitative evaluation of power usage and CO<sub>2</sub> emissions caused by

vehicle traffic. In this regard, air pollution-induced by traffic flow was evaluated in 2010 using the average daily traffic for the year in concern. The pollution status for 2015, 2020, and 2030 has been projected using traffic evolution factors. The assessment for this case study revealed that the environmental effect, as measured by pollutant emissions, is lowest considering the existing vehicle type and average speed. The environmental impact of road traffic is examined in the second case study using the current state of the road network pavement. This is due to the fact that road distress is increasing traffic congestion and pollution. According to this research, distressed road surfaces hamper cars speed and increase pollution. Passenger automobiles contribute the largest CO (72.18%) and CO<sub>2</sub> (vehicle engines) pollution (47.43%).

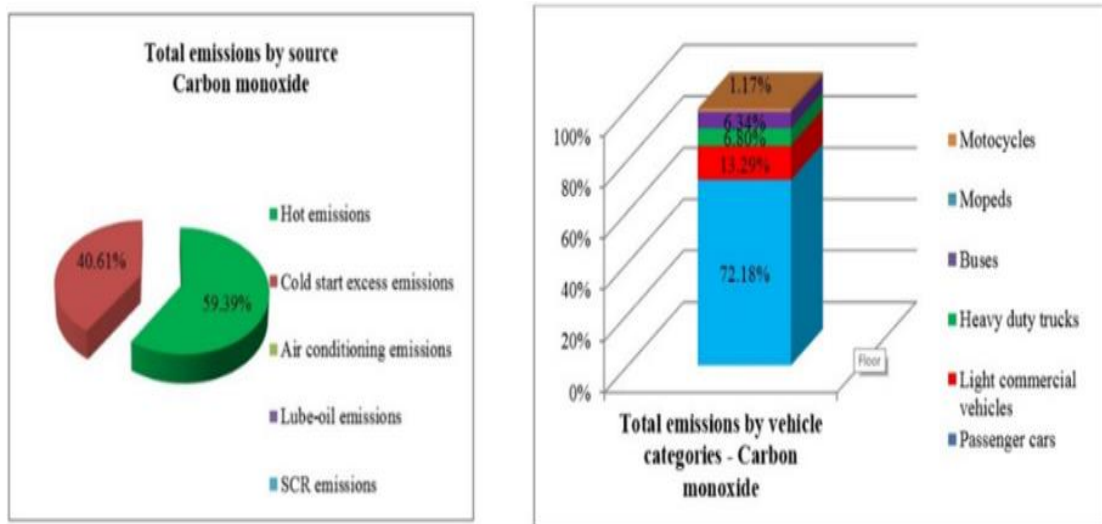

Figure 2.6: Distribution of total CO quantity due to traffic by emission source and vehicle category. (Source: Condurat et al., 2017)

On the other hand, 93.58% of all pollutant emissions were generated while a vehicle's engine was hot, regardless of driving style or fuel type. Alternative fuels and avoiding outdated vehicles were suggested to minimize CO<sub>2</sub> emissions; overheated engines emitted the most nitrogen oxides (98.09%), with heavy vehicles producing 41.7% compared to passenger cars' 18.9%.

Here in Bangladesh, Kamruzzaman and Mizunoya (2019) conducted research to determine the best possible corrective fuel tax for automobiles based on COPERT IV data. Using climate change policies as a benchmark, this study determines the most cost-effective ways to reduce gasoline prices in Bangladesh. The authors calculated the externalities starting with COPERT IV (European Road Transport Emission Model). On the other hand, they used the same approach to estimate the reduction in

greenhouse gases that the fuel tax will bring about. A relationship between the gas tax and emissions reduction was finally established. This study attempted to combine the current fuel tax with a US\$1.20 per gallon diesel tax in order to meet the country's decarbonization goal. Fuel taxes may be used to promote climate change legislation. In this research, the vehicle fleet of Bangladesh was compared with the COPERT vehicle category and merged with each other as shown in Figure 2.7.

| COPERT Passenger car Class |                     |                                |      | Bus               |            |                          |                               | LCV                       |               |          |              | HDV       |              |              |                              | Motorcycle   |             |            |
|----------------------------|---------------------|--------------------------------|------|-------------------|------------|--------------------------|-------------------------------|---------------------------|---------------|----------|--------------|-----------|--------------|--------------|------------------------------|--------------|-------------|------------|
| COPERT Sub class           | PC medium (1.4-2 l) | PC large-SUV-executive (> 2 l) |      | PC mini (1.4-2 l) |            | Coaches stand-ard ≤ 18 t | Urban buses stand-ard 15-18 t | Urban buses midi < = 15 t | N1-II, <3.5 t |          | Rigid ≤ 7.5t |           | Rigid 14-20t | Rigid 20-26t | 2-stroke <50 cm <sup>3</sup> |              |             |            |
| RHD class                  | Car/taxi            | Utility                        |      | Auto rick-shaw    | Auto tempo | Bus                      | Mini bus                      | Microbus                  | Small truck   |          | Truck        |           | Motorcycle   |              |                              |              |             |            |
| BRTA class                 | Car                 | Taxi                           | Jeep | Ambulance         | Pickup     | Auto rick-shaw           | Auto tempo                    | Human hauler              | Bus           | Mini bus | Microbus     | Cargo van | Covered van  | Delivery van | Small truck                  | Medium truck | Heavy truck | Motorcycle |

Figure 2.7: Rearrangement of vehicle class according to COPERT class  
(Source: Kamruzzaman and Mizunoya, 2019)

Figure 2.7 shows that vehicles were categorized by their size and weight. Less than 7.5 tonnes of trucks were considered as small trucks, and greater than 14 tonnes of trucks were considered as heavy trucks. On the other hand, more than 18 tonnes of buses were considered as large buses, and less than 15 tonnes were considered as micro-buses. According to their COPERT IV model calculations, the study results claimed that total PM<sub>2.5</sub> emissions from the road transport sector were 13,527.09 tons, with urban roads accounting for 39.75% of the pollution, rural roads accounting for 36.18%, and highways accounting for 24.07%.

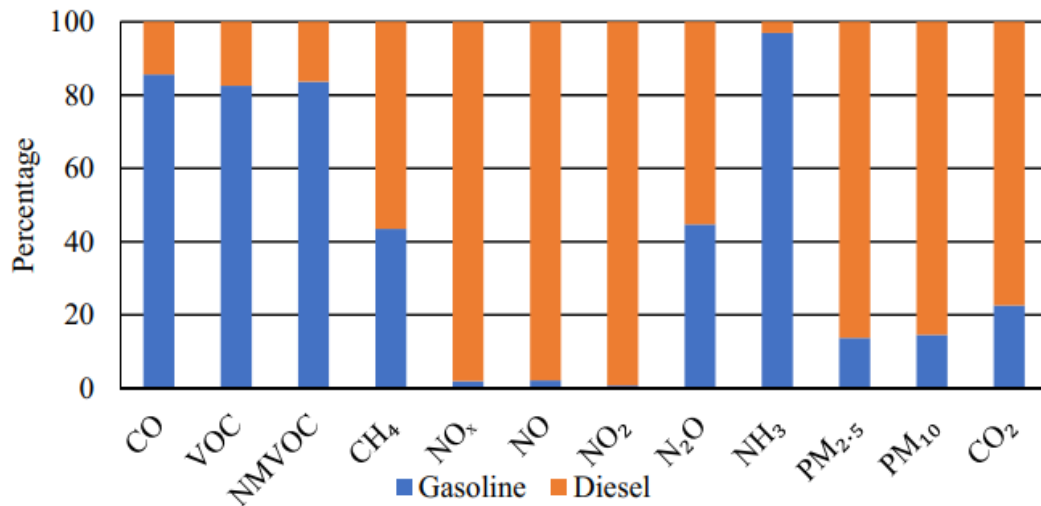

Figure 2.8: Share of fuel in total emission in BAU (calculation from COPERT IV).  
(Source: Kamruzzaman and Mizunoya, 2019)

Diesel cars were found to be primarily responsible for PM<sub>2.5</sub> (Fig. 2.8), accounting for 86% of overall pollution, whereas gasoline vehicles account for just 14%. More than one-fifth of all emissions come from minibuses, heavy vehicles, and large buses, respectively. Jeeps contributed to 11% of total emissions, compared to less than 10% for all other vehicles. A whopping 93% of all gasoline vehicle emissions came from motorcycles. More than half of all emissions were emitted by buses, followed by heavy-duty trucks (26.96%), motorcycles (12.61%), passenger cars (7.586%), and light commercial vehicles (2.42%).

## 2.7 Some Other Emission Inventory Used for Vehicular Emission Estimation

Apart from COPERT, there are more emission inventory models that are very popular widely to estimate vehicle traffic emissions. Maximum inventory models follow European or American standards, but they can be useful for Asian countries. Many of the Asian countries use these models for regional emission estimation. International Vehicle Emissions (IVE) Model, EMIT model, The Comprehensive Modal Emissions Model (CMEM), MOtor Vehicle Emission Simulator (MOVES), and MOBILE are the popular emission inventory model. (Rakha et al., 2004)

### 2.7.1 The Comprehensive Modal Emissions Model (CMEM)

The Comprehensive Modal Emissions Model (CMEM) was created by UCR researchers. CMEM calculates LDV and LDT emissions by mode. "Comprehensive"

refers to the model's capacity to anticipate emissions for several LDVs and LDTs in different operational conditions. In addition to the Federal Test Procedure (FTP), US06, and the Modal Emission Cycle (MEC), more than 300 automobiles, including 30 high-9 polluters, were tested in three driving cycles. Emissions from tailpipe and fuel consumption are estimated for a variety of vehicle and technology classes using CMEM's second-by-second calculations. Decomposition of the emission process into its constituent parts is the basis of the model. Temperature, speed, acceleration, and road grade are some of the vehicle and operating characteristics that are used as model inputs. (Rakha et al., 2004)

### **2.7.2 MOBILE6 Model**

The Environment Protection Agency (EPA)'s Transportation and Air Quality Department was involved in the development of the MOBILE5a and MOBILE6 models (OTAQ). The MOBILE6 is the most up-to-date model of the MOBILE family, and as such, it will be discussed in more depth. The MOBILE6 deviates greatly from the MOBILE5a in its design. In particular, MOBILE6 was built with the assistance of data obtained from recent vehicle-emission tests carried out by the EPA, CARB, and automotive manufacturers, in addition to inspection and maintenance tests carried out in a number of different states. MOBILE6 makes estimations of emission variables by taking into account a variety of route types, including highways, airways, and others. Based on the results of vehicle testing carried out throughout a number of facility cycles, emission factors may be modified to account for various facility types as well as various average speeds. In addition, MOBILE6 is very useful to calculate emission factors. It counts the starting point of the journey and the trip length in a manner that is distinct from one another. (Rakha et al., 2004)

### **2.7.3 International Vehicle Emissions (IVE) Model**

The International Vehicle Emissions Model (IVE) is a software program developed specifically to estimate the emissions produced by motor vehicles. In most countries, especially developing ones, there is a lack of understanding about emissions from automobiles, and the capacity to establish correct estimates of emissions is essential for planning air quality management. Specifically, a few nations, such as the United States and Europe, have created relatively accurate methods for projecting emissions,

and these models are only built for those countries' specific areas. The models used in the United States and Europe are unable to take into account the unique technology and circumstances that prevail in the majority of emerging nations. Most of these current models do not take into account the complete spectrum of global warming and local hazardous emissions, which are essential to conduct an accurate assessment of the effect that motor vehicles have. IVE Model was developed with the express intention of providing developing countries with the necessary degree of freedom in order for them to combat mobile source air emissions successfully. (Rakha et al., 2004)

#### **2.7.4 MOtor Vehicle Emission Simulator (MOVES)**

As the name suggests, the MOtor Vehicle Emissions Simulator (MOVES) developed by the Environmental Protection Agency (EPA) is a cutting-edge emissions modeling system that predicts the emissions of pollutants into air from motor vehicles. The MOVES program includes both on-road and off-road vehicles and equipment, such as bulldozers and lawnmowers. Examples of on-road vehicles include buses, trucks, passenger cars, etc. MOVES software does not apply to airplanes, trains, or ships that are used for commercial purposes. MOVES takes into consideration the phasing in of federal emissions requirements, the activity of vehicles and equipment, fuels, temperatures, and humidity, as well as measures to manage emissions such as inspection and maintenance (I/M) programs. A bottom-up emission model (MOVES) was created to estimate emissions from various physical emission processes based on the source of the emissions data. Instead of modeling the emissions produced by individual cars or pieces of equipment, MOVES calculates the "fleet average" emissions. In addition, MOVES modifies emission rates so that they accurately reflect the circumstances of the actual world.

### **2.8 Overview**

In this chapter, past research on automobile emissions is reviewed. Various factors that determine emission levels are briefly explored. This chapter discusses the several kinds of emission models used across the world. The entire purpose of this review chapter is to provide a comprehensive analysis of COPERT software and its use in the diverse literature produced by various authors.

## CHAPTER 3

### METHODOLOGY OF THE STUDY

#### 3.1 General

COPERT is a software which is used in 28 countries around Europe to calculate vehicular emission. It is a software that calculates Nitrous oxide ( $\text{N}_2\text{O}$ ), Carbon monoxide ( $\text{CO}$ ), Methane ( $\text{CH}_4$ ), Sulfur dioxide ( $\text{SO}_2$ ),  $\text{NO}_x$ , Volatile organic compound (VOC), and particulate matter (PM) emissions from various vehicle types, as well as  $\text{CO}_2$  emissions depending on fuel use. Moreover, the emission data is reported officially to UNFCCC, the UNECE LRTAP convention and to the European Union (emisias.com). Vehicle emission depends on several factors such as sizes of vehicles and its types; technology used to control emission; age of vehicle or engine; vehicle maintained by user or owner; usage of fuels depending on types of engines; vehicular usage or activity annually; vehicle operating speed; driving conditions; vehicle operating environment. For European cars, a distinct road transport emission calculating software (COPERT-based) was created. To calculate pollutant emissions and energy consumption, the model needs input of data such as the yearly active number of vehicles, year of introduction of regulations, fuel intake and characteristics on its basis, average temperatures of a country, route distribution/ driving condition (urban, highway, rural), and mean speeds within a region or country

There are primarily three main sets of emission standards: United States, Japanese and European. Kholod et al. (2006) recommended utilizing the COPERT software to compute vehicular emissions, particularly in countries that have accepted to follow European emission rules. Cai and Xie (2007) have used to estimate vehicular emissions at national and local levels for non-European nations as well as Lang et al. (2007), and Diab (2011), and many other researchers. Bangladesh has been following the European emission regulations since 2005, with Euro I for diesel cars and Euro II for gasoline vehicles (Pundir, 2012). This paper aims to determine vehicular emissions by using COPERT 5.5 thus comparing it with standard data so that the results found are justified.

## **3.2 Calculation Method**

### **3.2.1 Choice of Method**

CO<sub>2</sub>, NH<sub>3</sub>, SO<sub>x</sub>, CO, NO<sub>x</sub>, NMVOC, CH<sub>4</sub>, exhaust PM, PAHs and POPs, PCBs, HCB, and heavy metals found in the fuel and lubricant are all included in the emission estimating approach (lead, arsenic, cadmium, copper, chromium, mercury, nickel, selenium and zinc). NO<sub>x</sub> emissions are further divided into two categories: NO and NO<sub>2</sub>. As a result of vehicle technology, PM is also separated into two categories: elemental carbon and organic carbon. There is also a thorough speciation of NMVOCs, which includes homologous series such as alkanes, alkenes, alkynes, aldehydes, ketones, and aromatic compounds. The majority of PM mass emissions in vehicle exhaust are in the PM 2.5 size range. As a result, all mass emission factors for PM are considered to be equivalent to PM 2.5. For various particle size ranges, emission factors for particle number and surface are also presented.

In reality, road transport is most likely a major mode of transportation in all countries. As a result, if any more specific information rather than fuel data is not available, then Tier 1 technique should only be employed. If data on vehicle km for different vehicle technology is available, then tier 2 method is suitable. If data on vehicle km and mean travelling speed available per mode and vehicle technology is available, then tier 3 method is applied which is more accurate regarding determination of vehicular emission throughout the country. In this paper, tier 3 method was used as it is the most precise and detailed approach.

### **3.2.2 Tier 3 Method**

Exhaust emissions are computed using a mix of firm technical data (Ex: emission factors) and activity data in the Tier 3 technique outlined here (Ex: total vehicle km). Alternative Tier 3 approaches may be found in tools like Artemis, the DACH-NL Handbook of Emission Factors, and various national models (such as EMV in Sweden, Liipasto in Finland, and Versit+ in the Netherlands), among others.

### **3.2.3 Algorithm**

Total exhaust emissions from road transport are estimated using the Tier 3 technique as the sum of hot emissions (when the engine is running at its usual operating temperature) and emissions during transient thermal engine operation (also known as

"cold-start" emissions). Here the term "engine" is used as a shorthand for "engine and any exhaust after treatment systems" in this context. Because of the significant difference in vehicle emission performance during these two states, a differentiation between emissions during the 'hot' stable phase and the transient 'warming-up' phase is required. Because the concentrations of some pollutants are several times greater during the warming-up period than during hot operation, estimating the extra emissions during this time requires a distinct scientific approach. To summarize, the following equation may be used to compute total emissions:

$$E_{TOTAL}=E_{HOT}+E_{COLD} \dots (1)$$

Where,

$E_{TOTAL}$  = total emissions (g) of any pollutant for the spatial and temporal resolution of the application,

$E_{HOT}$  = emissions (g) during stabilized (hot) engine operation,

$E_{COLD}$  = emissions (g) during transient thermal engine operation (cold start).

The engine operation conditions have a big impact on vehicle emissions. Different driving situations necessitate different engine operation conditions and, as a result, different emission results. A contrast is drawn between urban, rural, and highway driving in this regard.

$$E_{TOTAL} = E_{URBAN} + E_{RURAL} + E_{HIGHWAY} \dots (2)$$

where:

$E_{URBAN}$ ,  $E_{RURAL}$  and  $E_{HIGHWAY}$  are the total emissions (g) of any pollutant for the respective driving situations.

Activity data for each vehicle and appropriate emission factors are multiplied in order to calculate total emission. The emission factors vary depending on several factors (state of driving, situation of climate). A flow chart of the application of the baseline methodology is shown in Figure 3.1.

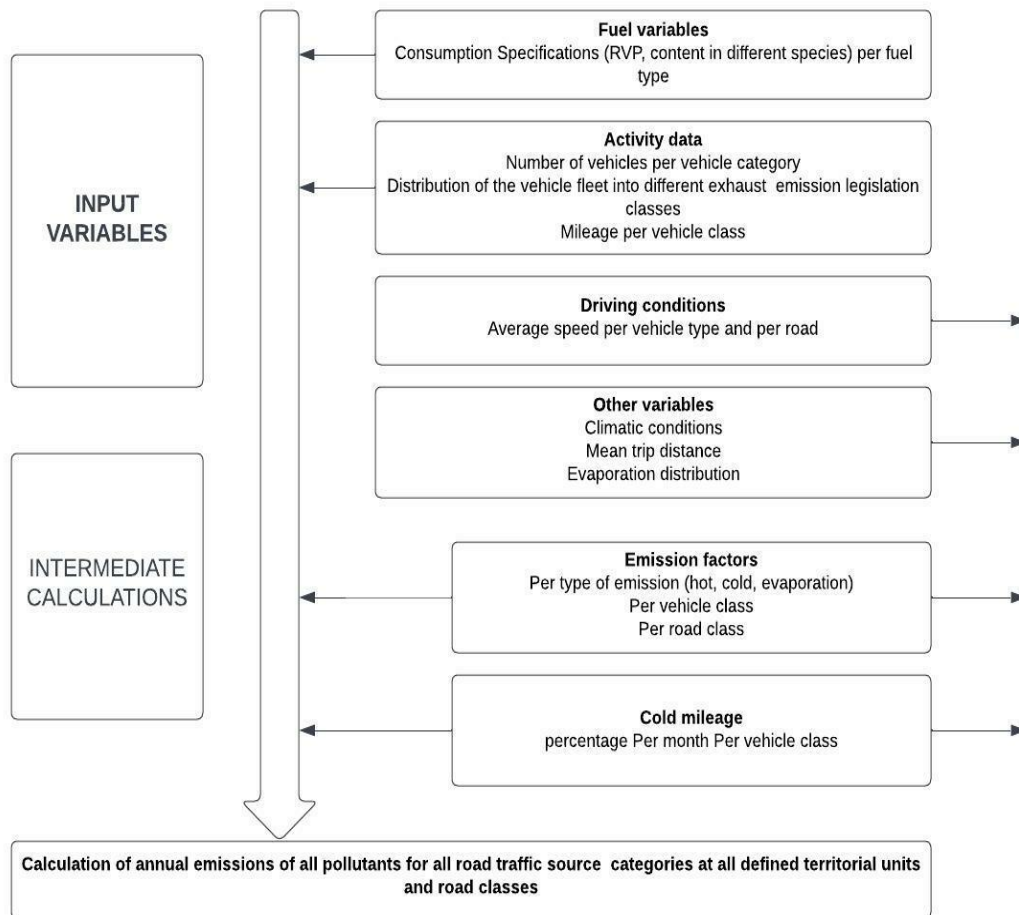

Figure 3.1: Flow chart of the application of the baseline methodology  
(Source: [www.emisia.com](http://www.emisia.com))

### 3.3 Hot Emissions

The distance traveled by each vehicle, speed it travelled with (or road type), age of engine, sizes of engine, and weight are all factors that influence hot exhaust emissions. The basic formula for estimating hot emissions for a given time period, and using experimentally obtained emission factors is:

$$\text{emission [g]} = \text{emission factor [g/km]} \times \text{number of vehicles [veh]} \times \text{mileage per vehicle [km/veh]}$$

For each vehicle category and class, different emission factors, vehicle numbers, and vehicle mileages must be employed. The length of time (month, year, etc.) is determined by the applicant. Therefore, the formula to be applied for the calculation of hot emissions of pollutants in the case of annual emission estimation, yields:

$$E_{\text{HOT}; i, k, r} = N_k \times M_{k,r} \times e_{\text{HOT}; i, k, r} \dots (3)$$

where,

$E_{\text{HOT}; i, k, r}$  = hot exhaust emissions of the pollutant  $i$  [g], produced in the period concerned by vehicles of technology  $k$  driven on roads of type  $r$ ,

$N_k$  = number of vehicles [veh] of technology  $k$  in operation in the period concerned,

$M_{k,r}$  = mileage per vehicle [km/veh] driven on roads of type  $r$  by vehicles of technology  $k$ ,

$e_{\text{HOT}; i, k, r}$  = emission factor in [g/km] for pollutant  $i$ , relevant for the vehicle technology  $k$ , operated on roads of type  $r$ .

### 3.4 Cold-Start Emissions

Exhaust emissions increase when a vehicle cold starts. It happens in all kinds of driving circumstances. They appear to be most probable for city and rural driving, given the number of starts on highways is quite low (as vehicles usually start from parking lots near highways). They occur in all vehicle types, but emission factors are only known, or can be reliably predicted, for petrol, diesel, and LPG automobiles, as well as light commercial vehicles that behave like passenger cars, therefore the technique only applies to these categories. Furthermore, they are not thought to be related to the age of the vehicle.

Cold-start emissions are computed as an additional to the emissions that would be expected if all cars were driven solely with hot engines and warmed-up catalysts. The proportion of kilometers driven with a cold engine is multiplied by a suitable factor, which corresponds to the ratio of cold to hot emissions. This is a variable that differs by nation. The time required to warm up the engine and/or the catalyst, and therefore the proportion of a trip driven with a cold engine, is affected by driving behavior (changing trip durations) and climatic circumstances. Cold-start emissions are introduced into the calculation as additional emissions per km using the following formula:

$$E_{\text{COLD}; i, j} = \beta_{i, k} \times N_k \times M_k \times e_{\text{HOT}; i, k} \times (e^{\text{COLD}} / e^{\text{HOT}}|_{i, k} - 1) \dots (4)$$

where,

$E_{\text{COLD}; i, k}$  = cold-start emissions of pollutant  $i$  (for the reference year), produced by vehicle technology  $k$ ,

$\beta_{i, k}$  = fraction of mileage driven with a cold engine or the catalyst operated below the light-off temperature for pollutant  $i$  and vehicle technology  $k$ ,

$N_k$  = number of vehicles [veh] of technology  $k$  in circulation,

$M_k$  = total mileage per vehicle [km/veh] in vehicle technology  $k$ ,

$e_{HOT; i, k}$  = hot emission factor for pollutant  $i$  and vehicles of  $k$  technology,

$e^{COLD} / e^{HOT}_{i,k}$  = cold/hot emission quotient for pollutant  $i$  and vehicles of  $k$  technology.

The  $\beta$  - parameter depends upon ambient temperature, here average monthly temperature is used, and the pattern of vehicle use - in particular the average trip length  $l_{trip}$ . However, because  $l_{trip}$  information for all vehicle classes is not accessible in many countries such as Bangladesh, certain vehicle classifications have been simplified. In this paper BRTA data was used for average trip length in Bangladesh (The Daily Star, 2010) which is equal to 5.37 km.

Shorter times for the catalyst to achieve the light-off temperature have been enforced by the adoption of more rigorous pollution rules for catalytic petrol cars. The lesser mileage driven under cold-start circumstances reflects this. As a result, for petrol catalytic automobiles, the  $\beta$ -parameter is also a function of the amount of emission control laws. Table 3.1 shows the elements to consider when estimating the parameter reduction for existing and future catalytic vehicles per pollutant.

Table 3.1: Reduction factors ( $bc_{i,k}$ ) for post-Euro 1 petrol vehicles (relative to Euro 1)  
(Source: [www.emisia.com](http://www.emisia.com))

| Emission legislation            | CO   | NOx  | VOC  |
|---------------------------------|------|------|------|
| Euro 2 — 94/12/EC               | 0.72 | 0.72 | 0.56 |
| Euro 3 — 98/69/EC<br>Stage 2000 | 0.62 | 0.32 | 0.32 |
| Euro 4 and later                | 0.18 | 0.18 | 0.18 |

On the other hand, there is no evidence to back up the usage of various  $e^{COLD} / e^{HOT}$  values for different vehicle classes. This means that the  $e^{COLD} / e^{HOT}$  values derived for Euro 1 cars may be used without additional reductions to subsequent vehicle classes. Similarly, the Euro 1 value should be used as the hot emission factor in the assessment of cold-start emissions.

Therefore, in the case of post-Euro 1 vehicles, equation (4) becomes:

$$E_{COLD; i, k} = bc_{i,k} \times \beta_{i, Euro\ 1} \times N_k \times M_k \times e_{hot, i, Euro\ 1} \times (e^{COLD} / e^{HOT} - 1)_{i, Euro\ 1} \dots(5).$$

The  $e^{COLD} / e^{HOT}$  cold/hot emission quotient is also affected by the ambient temperature and the pollutant in question. Although the model published in the first edition of this

approach is still used to calculate emissions during the cold-start period, in earlier updates of this chapter, revised quotients for catalyst-equipped petrol cars were introduced. The suggested technique, however, is still unable to adequately characterize the cold-start emission behavior of modern car technology, and a modification is planned for the future version of this chapter.

As previously stated, cold start emissions are often only associated with urban driving. However, if the mileage fraction traveled in non-thermally stabilized engine circumstances ( $\beta$  -parameter) exceeds the mileage share attributable to urban conditions, a portion of cold start emissions may be attributed to country driving ( $S_{URBAN}$ ). This necessitates a modification of equation (4), which yields:

If  $\beta_{i,k} > S_{URBAN}$

$$E_{COLD\ URBAN; i,k} = S_{URBAN; k} \times N_k \times M_k \times e_{HOT\ URBAN; i,k} \times (e^{COLD} / e^{HOT}_{i,k} - 1)$$

$$E_{COLD\ RURAL; i,k} = (\beta_{i,k} - S_{URBAN; k}) \times N_k \times M_k \times e_{HOT\ URBAN; i,k} \times (e^{COLD} / e^{HOT}_{i,k} - 1) \dots(6)$$

Similar modifications should also be brought into equation (6) as done in equation (5) in cases where  $bc_{i,k} \times \beta_{i,EURO\ 1} > S_U$ . The corrected value should be applied to the mileage fraction during the warm-up phase.

The complete distance travelled in urban conditions is allocated to warmup conditions in this scenario, while the remaining excess emissions are allocated to rural driving. Equation (6) illustrates an extreme example for a national inventory, and it can only occur when a very tiny number for  $l_{trip}$  has been specified. It is also worth noting that the urban hot emission factor is applied in both equations (6) because total cold-start emissions should not be separated by emission location.

$N_2O$ ,  $NH_3$ , and  $CH_4$  emissions are calculated using 'cold urban,' 'hot urban,' 'rural,' and 'highway' driving conditions. The computation algorithm used to determine the emissions of various pollutants is described in the following paragraphs. The estimate is especially important for methane ( $CH_4$ ) since NMVOC emissions are computed as the difference between VOCs and  $CH_4$ .

To begin, the percentage of miles traveled under thermally non-stabilized engine circumstances ( $\beta$  - parameter) surpasses the percentage of miles driven in urban

conditions ( $S_{\text{URBAN}}$ ) should be determined. The computation is as follows for each vehicle type  $j$  and pollutant ( $i = \text{CH}_4, \text{N}_2\text{O}, \text{NH}_3$ ):

if

$$\beta_{i,k} > S_{\text{URBAN};k} \dots (7)$$

$$E_{\text{COLD URBAN};i,k} = \beta_{i,k} \times N_k \times M_k \times e_{\text{COLD URBAN};i,k}$$

$$E_{\text{COLD RURAL};i,k} = 0$$

$$E_{\text{HOT URBAN};i,k} = 0$$

$$E_{\text{HOT RURAL};i,k} = [S_{\text{RURAL};k} - (\beta_{i,k} - S_{\text{URBAN};k})] \times N_k \times M_k \times e_{\text{HOT RURAL};i,k}$$

$$E_{\text{HOT HIGHWAY};i,k} = S_{\text{HIGHWAY};k} \times N_k \times M_k \times e_{\text{HOT HIGHWAY};i,k}$$

$$\text{else if } \beta_{i,k} \leq S_{\text{URBAN};k} \dots (8)$$

$$E_{\text{COLD URBAN};i,k} = \beta_{i,k} \times N_k \times M_k \times e_{\text{COLD URBAN};i,k}$$

$$E_{\text{COLD RURAL};i,k} = 0$$

$$E_{\text{HOT URBAN};i,k} = (S_{\text{URBAN};k} - \beta_{i,k}) \times N_k \times M_k \times e_{\text{HOT URBAN};i,k}$$

$$E_{\text{HOT RURAL};i,k} = S_{\text{RURAL};k} \times N_k \times M_k \times e_{\text{HOT RURAL};i,k}$$

$$E_{\text{HOT HIGHWAY};i,k} = S_{\text{HIGHWAY};k} \times N_k \times M_k \times e_{\text{HOT HIGHWAY};i,k}$$

where,

$S_{\text{URBAN};k}$  = mileage share attributed to urban conditions for vehicle technology  $k$ ,

$S_{\text{RURAL};k}$  = mileage share attributed to rural conditions for vehicle technology  $k$ ,

$S_{\text{HIGHWAY};k}$  = mileage share attributed to highway conditions for vehicle technology  $k$ ,

$e_{\text{COLD URBAN};i,k}$  = urban cold-start emission factor for pollutant  $i$ , by vehicle technology  $k$ ,

$e_{\text{HOT URBAN};i,k}$  = urban hot emission factor for pollutant  $i$ , by vehicle technology  $k$ ,

$e_{\text{HOT RURAL};i,k}$  = rural hot emission factor for pollutant  $i$ , by vehicle technology  $k$ ,

$e_{\text{HOT HIGHWAY};i,k}$  = highway hot emission factor for pollutant  $i$ , by vehicle technology  $k$

It should be noted that, the urban share ( $S_{\text{URBAN}}$ ) should be set to 100 percent when creating an urban inventory, whereas the rural ( $S_{\text{RURAL}}$ ) and highway ( $S_{\text{HIGHWAY}}$ ) shares should be set to zero. In any instance, the aggregate of the three shares must always equal to 100 percent, otherwise the computations will be incorrect.

# **CHAPTER 4**

## **DATA COLLECTION**

### **4.1 Introduction**

This chapter includes necessary information regarding the collection of all the data required for COPERT 5.5 to calculate the yearly vehicular emission in Bangladesh such as total stock information which includes the types of vehicles running in Bangladesh, number of vehicles registered for each vehicular type, information regarding division of stock according to fuel and technology type, mileage and activity information which includes the annual average km travelled and average speed of each vehicle type, fuel specifications such as the density of different grades of fuels used in Bangladesh, monthly Reid vapor pressure and the constituents of these fuels and environmental information which includes monthly maximum and minimum temperature and monthly average humidity in Bangladesh throughout the particular year. This chapter also includes the information regarding collection of yearly CO<sub>2</sub> emission data by the transport sector in Bangladesh obtained from a study made by World Bank, and collection of emission factors from a study made by NILU. All the data used in this study are from secondary data sources.

### **4.2 Vehicle Classification and Stock Number**

#### **4.2.1 Number of Motorized Vehicles Registered in Bangladesh throughout the Years**

The first major data required to create an emission inventory for Bangladesh is the number of each type of vehicle running in Bangladesh. The number of vehicles registered up to 2010 to 2021 was obtained from BRTA as shown in Table 4.1.

For the data before 2010, number of vehicles registered from 1988 to 2009 was obtained from Dhaka School of Economics (Obida, 2021) as shown in Table 4.2.

Table 4.1: Number of motor vehicles registered in Bangladesh from up to 2010 to 2021 (Source: BRTA, 2021)

| Vehicle category        | Up to 2010 | 2011   | 2012   | 2013   | 2014   | 2015   | 2016   | 2017   | 2018   | 2019   | 2020   | 2021   | Grand Total |
|-------------------------|------------|--------|--------|--------|--------|--------|--------|--------|--------|--------|--------|--------|-------------|
| Ambulance               | 2486       | 218    | 181    | 240    | 337    | 472    | 374    | 493    | 563    | 665    | 788    | 755    | 7572        |
| Auto Rickshaw           | 110623     | 20406  | 23528  | 15633  | 19828  | 18700  | 10656  | 8852   | 21593  | 29807  | 16724  | 9158   | 305508      |
| Auto Tempo              | 9446       | 175    | 626    | 393    | 472    | 1081   | 1313   | 1592   | 609    | 224    | 77     | 25     | 16033       |
| Bus                     | 23385      | 1753   | 1438   | 1104   | 1486   | 2378   | 3832   | 3757   | 2755   | 3558   | 2395   | 1517   | 49358       |
| Cargo Van               | 3363       | 489    | 282    | 686    | 605    | 398    | 1015   | 1413   | 1280   | 4      | 2      | 3      | 9540        |
| Covered Van             | 6022       | 2480   | 1511   | 2347   | 2950   | 2442   | 3399   | 5201   | 5728   | 3070   | 2023   | 3800   | 40973       |
| Delivery Van            | 15391      | 1037   | 802    | 941    | 1235   | 1779   | 2220   | 2420   | 2105   | 1523   | 1170   | 1436   | 32059       |
| Human Hauler            | 4827       | 1151   | 714    | 385    | 225    | 1129   | 3443   | 3393   | 1418   | 509    | 122    | 52     | 17368       |
| Jeep                    | 28131      | 2141   | 1575   | 1303   | 1849   | 3564   | 4869   | 5419   | 5547   | 5627   | 4911   | 7602   | 72538       |
| Microbus                | 62399      | 4037   | 3031   | 2530   | 4302   | 5177   | 5789   | 5571   | 4131   | 3682   | 2779   | 4941   | 108369      |
| Minibus                 | 23070      | 271    | 246    | 148    | 257    | 320    | 459    | 491    | 436    | 835    | 620    | 392    | 27545       |
| Motor Cycle             | 755514     | 116534 | 101895 | 85321  | 90401  | 229010 | 315089 | 325876 | 393545 | 401452 | 311016 | 375252 | 3500905     |
| Pick Up                 | 29103      | 10314  | 7530   | 6443   | 9424   | 9992   | 11220  | 13454  | 13060  | 11918  | 10498  | 10897  | 143853      |
| Private Passenger Car   | 207989     | 12942  | 9220   | 10456  | 14681  | 21029  | 20268  | 21952  | 18222  | 16779  | 12403  | 16049  | 381990      |
| Special Purpose Vehicle | 5022       | 391    | 225    | 228    | 174    | 298    | 613    | 994    | 1334   | 1179   | 703    | 518    | 11679       |
| Tanker                  | 2606       | 309    | 188    | 218    | 350    | 319    | 380    | 317    | 527    | 417    | 304    | 248    | 6183        |
| Taxicab                 | 35122      | 75     | 170    | 50     | 372    | 83     | 43     | 14     | 159    | 11     | 8      | 0      | 36107       |
| Tractor                 | 14648      | 5195   | 3494   | 1885   | 1521   | 1689   | 2535   | 2777   | 3553   | 2561   | 2498   | 2567   | 44923       |
| Truck                   | 65889      | 6853   | 4043   | 4838   | 7939   | 6022   | 6605   | 10329  | 12644  | 8318   | 4719   | 5789   | 143988      |
| Others                  | 22332      | 1265   | 1062   | 1064   | 1580   | 2059   | 3842   | 5018   | 5973   | 5293   | 3900   | 4029   | 57417       |
| Total                   | 1427368    | 188036 | 161761 | 136213 | 159988 | 307941 | 397964 | 419333 | 495182 | 497432 | 377660 | 445030 | 5013908     |

Table 4.2: Number of motor vehicles registered in Bangladesh from up to 1988 to 2009 (Source: Obida, 2021)

| Year                  | Car    | Jeep & Micro | Taxi  | Bus    | Truck  | Auto   | Bike   | Others | Grand Total |
|-----------------------|--------|--------------|-------|--------|--------|--------|--------|--------|-------------|
| Cumulative up to 1988 | 35,443 | 23,049       | 1,622 | 16,876 | 21,341 | 17,429 | 97,639 | -      | 213,399     |
| 1989                  | 2,835  | 1,844        | 97    | 1,155  | 1,280  | 1,133  | 10,740 | -      | 19,084      |
| 1990                  | 3,062  | 1,991        | 103   | 1,245  | 1,357  | 1,207  | 11,922 | -      | 20,887      |
| 1991                  | 2,620  | 1,789        | 92    | 599    | 926    | 3,661  | 9,991  | -      | 19,678      |
| 1992                  | 1,346  | 1,467        | 19    | 533    | 930    | 3,218  | 8,417  | -      | 15,930      |
| 1993                  | 29,937 | 3,337        | 847   | 7,061  | 14,539 | 17,215 | 26,651 | -      | 99,587      |
| 1994                  | 4,168  | 2,855        | 7     | 994    | 1,964  | 9,988  | 7,807  | -      | 27,783      |
| 1995                  | 6,964  | 2,181        | 17    | 1,021  | 3,468  | 14,188 | 8,868  | -      | 36,707      |
| 1996                  | 12,479 | 2,808        | 59    | 944    | 2,929  | 11,254 | 13,977 | -      | 44,450      |
| 1997                  | 8,354  | 1,759        | 14    | 970    | 1,282  | 6,546  | 12,080 | -      | 31,005      |
| 1998                  | 5,876  | 2,173        | 103   | 883    | 2,733  | 4,403  | 14,525 | -      | 30,696      |
| 1999                  | 4,986  | 1,223        | 216   | 746    | 2,018  | 2,140  | 16,511 | -      | 27,840      |
| 2000                  | 4,087  | 1,819        | 580   | 741    | 2,725  | 4,135  | 14,614 | -      | 28,701      |
| 2001                  | 6,587  | 2,465        | 771   | 1,812  | 2,575  | -603   | 24,409 | -      | 38,016      |
| 2002                  | 6,757  | 3,038        | 2,233 | 3,054  | 2,377  | 5,469  | 29,047 | -      | 51,975      |
| 2003                  | 7,045  | 1,804        | 5,020 | 2,015  | 2,795  | 13,866 | 21,096 | -      | 53,641      |
| 2004                  | 5,410  | 2,514        | 540   | 1,479  | 2,583  | 8,974  | 24,941 | 2,761  | 49,202      |
| 2005                  | 6,431  | 3,963        | 515   | 1,144  | 2,791  | 4,877  | 43,226 | 2,931  | 65,878      |
| 2006                  | 8,447  | 5,540        | 275   | 1,261  | 3,065  | 6,898  | 51,106 | 3,713  | 80,305      |
| 2007                  | 11,941 | 5,650        | 15    | 1,750  | 2,521  | 10,530 | 85,131 | 3,734  | 121,272     |
| 2008                  | 16,927 | 6,537        | 9     | 1,649  | 2,609  | 19,071 | 93,541 | 4,076  | 144,419     |
| 2009                  | 21,461 | 9,027        | 12    | 1,504  | 6,561  | 14,902 | 45,142 | 6,634  | 105,243     |

However the data for the year 2010 was not found from either of these sources and there is a difference of opinion about the number of vehicles registered up to 2010 between RHD and BRTA, which gives a negative value for the year 2010 by back calculation. To fix this problem, the number of vehicles registered up to 2010 value by BRTA was omitted in the analysis and data for the year 2010 was obtained from the Revisions of Vehicular Emission Standards for Bangladesh report (Pundir, 2012) as shown in Table 4.3.

Table 4.3: Number of motor vehicles registered in the year 2010 (Source: Pundir, 2012)

| Vehicle Category              | Number of vehicles registered in the year 2010 |
|-------------------------------|------------------------------------------------|
| Car                           | 20690                                          |
| Jeep/ Station Wagon/ Microbus | 8040                                           |
| Taxi                          | 0                                              |
| Bus                           | 1233                                           |
| Minibus                       | 311                                            |
| Truck                         | 10056                                          |
| Auto Rickshaw/ Auto Tempo     | 19018                                          |
| Motorcycle                    | 88499                                          |
| Others                        | 13331                                          |
| Total                         | 161178                                         |

BRTA classified the vehicles into 20 different categories as shown in Table 4.1. On the other hand, DScE classified the vehicles into the following 8 categories: Car (private Car), Jeep and Micro (combination of Jeep, Microbus and Station Wagons), Taxi (Taxicabs), Bus (combination of Bus, Minibus and Human Hauler), Truck (combination of Truck, Tanker, Covered Van, Cargo Van), Auto (combination of Auto Rickshaw and Auto Tempo), Bike and Others (combination of Special Vehicle, Delivery Van, Ambulance, Tractor and Pick Up) as shown in Table 4.2 (Obida, 2021). In contrast, the vehicles were classified into 9 categories in the Revisions of Vehicular Emission Standards for Bangladesh report (RHD, 2012) as shown in Table 4.3. In order to obtain the motor vehicles registered from the last 34 years, it was necessary to combine the above mentioned three sets of data from three different sources, each with different vehicle classifications.

For greater accuracy, the 20 BRTA classifications as shown in Table 4.1 were preferred for this study. The combined data from 1989 to 2010 were broken down into its subcategories by the average ratio of the subcategories observed in the years 2011

to 2021 from the BRTA data. For example, Jeep and Micro (Total) was broken down into corresponding Jeep and Microbus by calculating the average ratio of Jeeps and Microbuses observed in the years 2011 to 2021 and then breaking down the given number of Jeep and Micro (Total) into the 2 subcategories using the respective ratios. The breakdown of Jeep and Micro (Total) into corresponding Jeep and Microbus is shown in Table 4.4.

Table 4.4: Calculation of average ratio of Jeep and Microbus observed during 2011-2021

| Year          | Jeep | Microbus | Ratio of Jeep with respect to Microbus | Ratio of Microbus with respect to Jeep |
|---------------|------|----------|----------------------------------------|----------------------------------------|
| 2011          | 2141 | 4037     | 0.346552                               | 0.653448                               |
| 2012          | 1575 | 3031     | 0.341945                               | 0.658055                               |
| 2013          | 1303 | 2530     | 0.339943                               | 0.660057                               |
| 2014          | 1849 | 4302     | 0.300602                               | 0.699398                               |
| 2015          | 3564 | 5177     | 0.407734                               | 0.592266                               |
| 2016          | 4869 | 5789     | 0.45684                                | 0.54316                                |
| 2017          | 5419 | 5571     | 0.493085                               | 0.506915                               |
| 2018          | 5547 | 4131     | 0.573156                               | 0.426844                               |
| 2019          | 5627 | 3682     | 0.604469                               | 0.395531                               |
| 2020          | 4911 | 2779     | 0.638622                               | 0.361378                               |
| 2021          | 7602 | 4941     | 0.606075                               | 0.393925                               |
| Average ratio |      |          | 0.464456                               | 0.535544                               |

The number of Jeep and Micro (total) was multiplied by the average ratio of Jeep with respect to Microbus to find the number of Jeeps and similarly, it was multiplied by the average ratio of Microbus to find the number of Microbuses for the previous years as shown in Table 4.5.

Table 4.5: Breakdown of Jeep and Micro (Total) into corresponding Jeep and Microbus

| Year | Jeep & Micro (total) | Average Ratio of Jeep with respect to Microbus | Jeep = Total* Average ratio | Average Ratio of Microbus with respect to Jeep | Microbus = Total* Average ratio |
|------|----------------------|------------------------------------------------|-----------------------------|------------------------------------------------|---------------------------------|
| 1989 | 1,844                | 0.464456                                       | 856                         | 0.535544                                       | 988                             |
| 1990 | 1,991                |                                                | 925                         |                                                | 1066                            |
| 1991 | 1,789                |                                                | 831                         |                                                | 958                             |
| 1992 | 1,467                |                                                | 681                         |                                                | 786                             |
| 1993 | 3,337                |                                                | 1550                        |                                                | 1787                            |
| 1994 | 2,855                |                                                | 1326                        |                                                | 1529                            |
| 1995 | 2,181                |                                                | 1013                        |                                                | 1168                            |
| 1996 | 2,808                |                                                | 1304                        |                                                | 1504                            |
| 1997 | 1,759                |                                                | 817                         |                                                | 942                             |
| 1998 | 2,173                |                                                | 1009                        |                                                | 1164                            |
| 1999 | 1,223                |                                                | 568                         |                                                | 655                             |
| 2000 | 1,819                |                                                | 845                         |                                                | 974                             |
| 2001 | 2,465                |                                                | 1145                        |                                                | 1320                            |
| 2002 | 3,038                |                                                | 1411                        |                                                | 1627                            |
| 2003 | 1,804                |                                                | 838                         |                                                | 966                             |
| 2004 | 2,514                |                                                | 1168                        |                                                | 1346                            |
| 2005 | 3,963                |                                                | 1841                        |                                                | 2122                            |
| 2006 | 5,540                |                                                | 2573                        |                                                | 2967                            |
| 2007 | 5,650                |                                                | 2624                        |                                                | 3026                            |
| 2008 | 6,537                |                                                | 3036                        |                                                | 3501                            |
| 2009 | 9,027                |                                                | 4193                        |                                                | 4834                            |
| 2010 | 8040                 |                                                | 3734                        |                                                | 4306                            |

Similar calculation was done for the remaining combined categories to break them down into 20 categories. The resultant stock from 1989 to 2009 is shown in Table 4.6.

Table 4.6: Number of registered vehicles from 1989 to 2010

| Year                    | 1989  | 1990  | 1991 | 1992 | 1993  | 1994 | 1995  | 1996  | 1997  | 1998  | 1999  |
|-------------------------|-------|-------|------|------|-------|------|-------|-------|-------|-------|-------|
| Ambulance               | -     | -     | -    | -    | -     | -    | -     | -     | -     | -     | -     |
| Auto Rickshaw           | 1088  | 1159  | 3514 | 3089 | 16525 | 9587 | 13619 | 10803 | 6283  | 4226  | 2054  |
| Auto Tempo              | 45    | 48    | 147  | 129  | 690   | 401  | 569   | 451   | 263   | 177   | 86    |
| Bus                     | 740   | 798   | 384  | 342  | 4526  | 637  | 654   | 605   | 622   | 566   | 478   |
| Cargo Van               | 59    | 63    | 43   | 43   | 674   | 91   | 161   | 136   | 59    | 127   | 93    |
| Covered Van             | 363   | 385   | 262  | 264  | 4120  | 557  | 983   | 830   | 363   | 775   | 572   |
| Delivery Van            | -     | -     | -    | -    | -     | -    | -     | -     | -     | -     | -     |
| Human Hauler            | 280   | 302   | 145  | 129  | 1714  | 241  | 248   | 229   | 236   | 214   | 181   |
| Jeep                    | 856   | 925   | 831  | 681  | 1550  | 1326 | 1013  | 1304  | 817   | 1009  | 568   |
| Microbus                | 988   | 1066  | 958  | 786  | 1787  | 1529 | 1168  | 1504  | 942   | 1164  | 655   |
| Minibus                 | 134   | 145   | 70   | 62   | 821   | 116  | 119   | 110   | 113   | 103   | 87    |
| Motor Cycle             | 10740 | 11922 | 9991 | 8417 | 26651 | 7807 | 8868  | 13977 | 12080 | 14525 | 16511 |
| Pick Up                 | 0     | 0     | 0    | 0    | 0     | 0    | 0     | 0     | 0     | 0     | 0     |
| Private Passenger Car   | 2835  | 3062  | 2620 | 1346 | 29937 | 4168 | 6964  | 12479 | 8354  | 5876  | 4986  |
| Special Purpose Vehicle | -     | -     | -    | -    | -     | -    | -     | -     | -     | -     | -     |
| Tanker                  | 39    | 41    | 28   | 28   | 442   | 60   | 105   | 89    | 39    | 83    | 61    |
| Taxicab                 | 97    | 103   | 92   | 19   | 847   | 7    | 17    | 59    | 14    | 103   | 216   |
| Tractor                 | 0     | 0     | 0    | 0    | 0     | 0    | 0     | 0     | 0     | 0     | 0     |
| Truck                   | 819   | 868   | 593  | 595  | 9303  | 1257 | 2219  | 1874  | 820   | 1749  | 1291  |
| Others                  | -     | -     | -    | -    | -     | -    | -     | -     | -     | -     | -     |

Table 4.6: Number of registered vehicles from 1989 to 2010 (continued)

| Year                    | 2000  | 2001  | 2002  | 2003  | 2004  | 2005  | 2006  | 2007  | 2008  | 2009  | 2010  |
|-------------------------|-------|-------|-------|-------|-------|-------|-------|-------|-------|-------|-------|
| Ambulance               | -     | -     | -     | -     | 67    | 71    | 90    | 90    | 98    | 9     | 322   |
| Auto Rickshaw           | 3969  | 4191  | 5250  | 13310 | 8614  | 4681  | 6621  | 10108 | 18306 | 14304 | 18255 |
| Auto Tempo              | 166   | 175   | 219   | 556   | 360   | 196   | 277   | 422   | 765   | 598   | 763   |
| Bus                     | 475   | 1161  | 1957  | 1292  | 948   | 733   | 808   | 1122  | 1057  | 964   | 904   |
| Cargo Van               | 126   | 119   | 110   | 129   | 120   | 129   | 142   | 117   | 121   | 304   | 466   |
| Covered Van             | 772   | 730   | 674   | 792   | 732   | 791   | 869   | 714   | 739   | 1859  | 2850  |
| Delivery Van            | -     | -     | -     | -     | 220   | 234   | 296   | 298   | 325   | 530   | 1064  |
| Human Hauler            | 180   | 440   | 742   | 489   | 359   | 278   | 306   | 425   | 400   | 365   | 329   |
| Jeep                    | 845   | 1145  | 1411  | 838   | 1168  | 1841  | 2573  | 2624  | 3036  | 4193  | 3734  |
| Microbus                | 974   | 1320  | 1627  | 966   | 1346  | 2122  | 2967  | 3026  | 3501  | 4834  | 4306  |
| Minibus                 | 86    | 211   | 355   | 234   | 172   | 133   | 147   | 203   | 192   | 175   | 311   |
| Motor Cycle             | 14614 | 24409 | 29047 | 21096 | 24941 | 43226 | 51106 | 85131 | 93541 | 45142 | 88499 |
| Pick Up                 | 0     | 0     | 0     | 0     | 1544  | 1640  | 2077  | 2089  | 2280  | 3711  | 7457  |
| Private Passenger Car   | 4087  | 6587  | 6757  | 7045  | 5410  | 6431  | 8447  | 11941 | 16927 | 21461 | 20690 |
| Special Purpose Vehicle | -     | -     | -     | -     | 81    | 86    | 109   | 109   | 119   | 194   | 390   |
| Tanker                  | 83    | 78    | 72    | 85    | 79    | 85    | 93    | 77    | 79    | 199   | 306   |
| Taxicab                 | 580   | 771   | 2233  | 5020  | 540   | 515   | 275   | 15    | 9     | 12    | 0     |
| Tractor                 | 0     | 0     | 0     | 0     | 417   | 443   | 561   | 564   | 615   | 1002  | 2013  |
| Truck                   | 1744  | 1648  | 1521  | 1788  | 1653  | 1786  | 1961  | 1613  | 1669  | 4198  | 6435  |
| Others                  | -     | -     | -     | -     | 432   | 458   | 581   | 584   | 638   | 1038  | 2085  |

However, the total number of registered vehicles from 1989 to 2021 is of course, not equal to the number of vehicles currently running in Bangladesh. Obida (2021) stated that Human hauler, Minibus, Auto Rickshaw and Auto Tempo registered before 2020 are scarcely running on the road. It is hard to find a vehicle on the road which was registered 30 years ago and on the odd occasion that a 30+ aged vehicle is still running, it is owed to very good maintenance of the vehicle by its owner, but that is not common for a country like Bangladesh. Aisudin (2014) stated that Toyota regards cars as unusable after 25 years and the average lifespan of a car is 20 years. In this research, it was assumed that vehicles running in the particular year of analysis were no more than 20 years of age. Therefore 20 years' stock data was taken into account for each year of analysis.

#### **4.2.2 Prediction of Number of Motorized Vehicles Registered in Bangladesh for the Year 2025**

The stock number for the year 2025 was predicted by using the rate of growth of different vehicle types observed in previous years. The stock number from the year 2021 was used to calculate that of the year 2022, which was used to calculate the stock number of 2023 and so on up to the year 2025 assuming a uniform rate of growth throughout all these years. The yearly rate of increase in the registration of each type of vehicle was collected from the Road User Cost (RUC) report (RHD, 2017) as shown Table 4.7.

Table 4.7: Yearly rate of increase in number of vehicles registered in Bangladesh (Source: RHD, 2017)

| Vehicle Category      | Yearly rate of increase |
|-----------------------|-------------------------|
| Car                   | 5%                      |
| Utility (Jeep/Pickup) | 12%                     |
| Auto Rickshaw         | 9%                      |
| Tempo                 | 8%                      |
| Large Bus             | 6%                      |
| Micro Bus             | 6%                      |
| Mini Bus              | 1%                      |
| Small Truck           | 8%                      |
| Medium Truck          | 8%                      |
| Heavy Truck           | 8%                      |
| Motorcycle            | 16%                     |

### 4.3 Breakdown of Stock into Fuel Type

Currently there is no data available on the exact percentage of fuel type used by different registered vehicle classes, but BRTA plans to maintain this type of record in the future. For this paper, data collected from the Revisions of Vehicular Emission Standards for Bangladesh report (Pundir, 2012) on the types of fuels of the vehicles running in Dhaka was taken into consideration as shown in the Table 4.8.

Table 4.8: Fuel split in Dhaka found from a previous study (Source: Pundir, 2012)

| <b>Vehicle Category</b>              | <b>Vehicles running on CNG (%)</b> | <b>Vehicles running on Petrol (%)</b> | <b>Vehicles running on Diesel (%)</b> |
|--------------------------------------|------------------------------------|---------------------------------------|---------------------------------------|
| Cars and Taxis                       | 96                                 | 4                                     | 0                                     |
| Auto Rickshaws                       | 97                                 | 3                                     | 0                                     |
| Jeeps, Microbuses and Station Wagons | 81                                 | 3                                     | 16                                    |
| Delivery vans and Mini trucks        | 44                                 | 1                                     | 55                                    |
| Buses and Minibuses                  | 61                                 | 0                                     | 39                                    |
| Motorcycles                          | 0                                  | 100                                   | 0                                     |

To divide the stock into different fuel types using this data, sensible alterations were made where necessary considering the entire country not just Dhaka and the also considering the improvement in the automobile and fuel industry in Bangladesh during the interval between 2012 and the year of analysis.

### 4.4 Breakdown of Stock into Technology Type

To divide the stock into corresponding technology types that are available in COPERT 5.5, the launching year and ending year of production of different euro standard engines in Europe were considered which are as shown in Table 4.9.

Table 4.9: Timeline of implementation of different Euro standards in Europe (Source: Ntziachristos and Samaras, 2021)

| Vehicle category          | Type of fuel | Euro Standard | Launching year  | Ending year of production |
|---------------------------|--------------|---------------|-----------------|---------------------------|
| Passenger cars            | Petrol       | 1             | 1992            | 1996                      |
|                           |              | 2             | 1996            | 1999                      |
|                           |              | 3             | 2000            | 2004                      |
|                           |              | 4             | 2005            | 2009                      |
|                           |              | 5             | 2011            | 2014                      |
|                           |              | 6 a/b/c       | 2014            | 2016                      |
|                           |              | 6 d-temp      | 2019            | 2020                      |
|                           |              | 6 d           | 2021 and beyond | -                         |
|                           | Diesel       | 1             | 1992            | 1996                      |
|                           |              | 2             | 1996            | 2000                      |
|                           |              | 3             | 2000            | 2005                      |
|                           |              | 4             | 2005            | 2010                      |
|                           |              | 5             | 2010            | 2014                      |
|                           |              | 6 a/b/c       | 2014            | 2019                      |
|                           |              | 6 d-temp      | 2019            | 2020                      |
|                           |              | 6 d           | 2021 and beyond | -                         |
|                           | CNG          | 4             | 2005            | 2009                      |
|                           |              | 5             | 2010            | 2014                      |
|                           |              | 6 a/b/c       | 2015            | 2016                      |
|                           |              | 6 d-temp      | 2017            | 2019                      |
|                           |              | 6 d           | 2020 and beyond | -                         |
| Light Commercial Vehicles | Petrol       | 1             | 1993            | 1997                      |
|                           |              | 2             | 1997            | 2001                      |
|                           |              | 3             | 2001            | 2006                      |
|                           |              | 4             | 2006            | 2010                      |
| Light Commercial Vehicles | Petrol       | 5             | 2011            | 2015                      |
|                           |              | 6 a/b/c       | 2016            | 2017                      |
|                           |              | 6 d-temp      | 2018            | 2020                      |
|                           |              | 6 d           | 2021 and beyond | -                         |
|                           | Diesel       | 1             | 1993            | 1997                      |
|                           |              | 2             | 1997            | 2001                      |
|                           |              | 3             | 2001            | 2006                      |
|                           |              | 4             | 2006            | 2011                      |
|                           |              | 5             | 2011            | 2015                      |

Table 4.9 (continued)

| Vehicle category          | Type of fuel | Euro Standard | Launching year  | Ending year of production |
|---------------------------|--------------|---------------|-----------------|---------------------------|
| Light Commercial Vehicles | Diesel       | 6 a/b/c       | 2015            | 2017                      |
|                           |              | 6 d-temp      | 2018            | 2020                      |
|                           |              | 6 d           | 2021 and beyond | -                         |
| Heavy Duty Trucks         | Diesel       | 1             | 1992            | 1995                      |
|                           |              | 2             | 1996            | 2000                      |
|                           |              | 3             | 2000            | 2005                      |
|                           |              | 4             | 2005            | 2008                      |
|                           |              | 5             | 2008            | 2013                      |
|                           |              | 6 a/b/c       | 2013            | 2019                      |
|                           |              | D/E           | 2021 and beyond | -                         |
| Motorcycles               | Petrol       | Conventional  |                 | up to 1999                |
|                           |              | 1             | 1999            | 2003                      |
|                           |              | 2             | 2003            | 2006                      |
|                           |              | 3             | 2006            | 2013                      |
|                           |              | 4             | 2016            | 2020                      |
|                           |              | 5             | 2021 and beyond | -                         |

Pundir (2012) stated that there would be a time lag of five to fifteen years for Asian countries like Bangladesh with respect to Europe for the implementation of Euro standards due to unavailability of required quality of fuel, lack of necessary infrastructure, slow technological growth and poor economic conditions. For imported vehicles in Bangladesh, Euro 3 standard was implemented for Dhaka city and Chittagong city and Euro 2 standard was implemented for the rest of the nation, effective since July 2014. The government also planned to implement the emission standard of imported vehicles to be Euro 4 standard for Dhaka city and Chittagong city and Euro 3 standard for the rest of the nation, from July 2019, This resulted in the import of new cars from India, Thailand, and Indonesia with emission standard of Euro 4 and the import of reconditioned cars from Japan and European countries with emission standard of Euro 5 or higher.

Furthermore, an age limit of for imported cars and second hand motorcycles, LCV's and HDV's was also implemented since July 2014 (Mansur, 2021). Considering local conditions and timeline of emission standards in Bangladesh, a minimum time lag of 5 years was considered with respect to Europe for this analysis.

## 4.5 Matching Vehicle Classifications from BRTA and RHD with Equivalent COPERT 5.5 Classification

Stock data has been collected and classified according to 20 BRTA classifications but mileage and activity data were found for 11 RHD classifications, so it was necessary to find COPERT 5.5 classifications equivalent to both BRTA and RHD classifications. This was done by studying the characteristics of representative models of the vehicles (most commonly purchased model in Bangladesh) like axle number, weight and dimensions collected from the RUC report (RHD, 2017) and with the help of a similar study (Kamruzzaman and Mizunoya, 2019), as shown in Table 4.10.

Table 4.10: COPERT 5.5 classifications equivalent to BRTA and RHD classifications

| BRTA Classification(s)                  | RHD Classification    | Equivalent COPERT 5.5 Classification         |
|-----------------------------------------|-----------------------|----------------------------------------------|
| Cars and Taxicabs                       | Car                   | Passenger Car (Medium)                       |
| Ambulance, Jeep and Pickup              | Utility (Jeep/Pickup) | Passenger Car (Large-SUV-Executive)          |
| Auto Rickshaw                           | Auto Rickshaw         | Passenger Car (Mini)                         |
| Tempo and Human Hauler                  | Tempo                 | Passenger Car (Small)                        |
| Large Bus                               | Large Bus             | Buses (Coaches Standard $\leq 18$ t)         |
| Minibus (Diesel fueled)                 | Mini Bus              | Buses (Urban Buses Standard 15 - 18t)        |
| Microbus (Diesel fueled)                | Micro Bus             | Buses (Urban Buses Midi $\leq 15$ t)         |
| Minibus and Microbus (CNG fueled)       | Mini Bus              | Buses (Urban CNG Buses)                      |
| Cargo Van, Delivery Van and Covered Van | Small Truck           | Light Commercial Vehicles (N1-II, $< 3.5$ t) |
| Tractors and Trucks                     | Small Truck           | Heavy duty trucks (Rigid $\leq 7.5$ t)       |
| Trucks                                  | Medium Truck          | Heavy duty trucks (Rigid 14-20t)             |
| Tankers and Trucks                      | Heavy Truck           | Heavy duty trucks (Rigid 20-26t)             |
| Motor Cycle                             | Motorcycle            | 4 stroke $< 250$ cm <sup>3</sup> Motorcycle  |

Because BRTA has one classification called "Trucks" and RHD classifies trucks as "Heavy", "Medium" and "Small" therefore the stock was equally divided into three. The BRTA Classes "Others" and "Special Purpose Vehicles" were also equally distributed into all the COPERT 5.5 classes. Since there is only one CNG fueled bus class available in COPERT called "Urban CNG Buses", the percentage of CNG fueled Minibuses and Microbuses were combined and used in the calculation.

## 4.6 Mileage and Activity Information

The annual km travelled and average speeds of vehicles were collected from RUC report (RHD, 2017). The data was collected by RHD by conducting field surveys in the National/Regional Highways and Zilla roads in seven divisions: Dhaka, Chittagong, Rajshahi, Rangpur, Sylhet, Khulna and Barisal as shown in Table 4.11.

Table 4.11: Annual mileage and average speed of different vehicles (Source: RHD, 2017)

| Vehicle Category      | 2004-2005                          |                                    | 2016-2017                          |                                    |
|-----------------------|------------------------------------|------------------------------------|------------------------------------|------------------------------------|
|                       | Annual Km Driven (km) in 2004-2005 | Average speed (km/hr) in 2004-2005 | Annual Km Driven (km) in 2016-2017 | Average speed (km/hr) in 2016-2017 |
| Heavy Truck           | -                                  | -                                  | 72,200                             | 31                                 |
| Medium Truck          | 80,700                             | 40                                 | 67,200                             | 31                                 |
| Small Truck           | 74,000                             | 42                                 | 59,000                             | 29                                 |
| Large Bus             | 129,800                            | 45                                 | 102,700                            | 37                                 |
| Mini Bus              | 66,700                             | 31                                 | 56,300                             | 26                                 |
| Micro Bus             | 56,800                             | 49                                 | 50,600                             | 36                                 |
| Utility (Jeep/Pickup) | 22,000                             | 25                                 | 31,800                             | 26                                 |
| Car                   | 50,000                             | 39                                 | 36,094                             | 33                                 |
| Tempo                 | 44,000                             | 21                                 | 40,900                             | 21                                 |
| Auto Rickshaw         | 46,000                             | 27                                 | 28,700                             | 17                                 |
| Motor Cycle           | 13,000                             | 22                                 | 24,000                             | 27                                 |

Since data for heavy trucks were not collected in 2004-2005, the annual km travelled and average speed for heavy trucks were assumed to be the same as that of medium trucks. Average annual km travelled and average speed was found to decrease from 2004-2005 to 2016-2017 for all vehicle categories except for Utility (Jeep/Pickup) and Motor cycles, and speed for Tempo seemed to have stayed the same. However due to the rampant increase in vehicle population and congestion it is more appropriate for the analysis to consider that the average vehicle speed should decrease by a small amount or none at all, rather than increase. Therefore practical assumptions were made for Utility and motorcycle speeds during 2016-2017 for analysis. Since the annual km travelled for remaining eight vehicle categories were found to decrease, the annual km travelled by Utility and Motor cycle was also assumed to decrease at the average rate at which most vehicles' mileage decreased. Since exact information regarding trend of mileage and average speed of vehicles throughout the years in Bangladesh does not exist, it was required to assume a uniform yearly decrease of

mileage per year in order to find the data for particular year of analysis as shown in Table 4.12.

Table 4.12: Decrease in mileage per year for different RHD vehicle categories

| Vehicle Category      | Annual Km Driven (km) in 2004-2005 | Annual Km Driven (km) in 2016-2017 | Change in 11 years (km) | Uniform change per year (km) |
|-----------------------|------------------------------------|------------------------------------|-------------------------|------------------------------|
| Heavy Truck           | 80,700                             | 72,200                             | 8,500                   | 772.7273                     |
| Medium Truck          | 80,700                             | 67,200                             | 13,500                  | 1227.2727                    |
| Small Truck           | 74,000                             | 59,000                             | 15,000                  | 1363.6364                    |
| Large Bus             | 129,800                            | 102,700                            | 27,100                  | 2463.6364                    |
| Mini Bus              | 66,700                             | 56,300                             | 10,400                  | 945.4545                     |
| Micro Bus             | 56,800                             | 50,600                             | 6,200                   | 563.6364                     |
| Utility (Jeep/Pickup) | 22,000                             | 19,800                             | 2,200                   | 200.0000                     |
| Car                   | 50,000                             | 36,094                             | 13,906                  | 1264.1818                    |
| Tempo                 | 44,000                             | 40,900                             | 3,100                   | 281.8182                     |
| Auto Rickshaw         | 46,000                             | 28,700                             | 17,300                  | 1572.7273                    |
| Motor Cycle           | 13,000                             | 11,700                             | 1,300                   | 118.1818                     |

Similarly, a uniform yearly decrease in average speed was required to assume in order to find the data for particular year of analysis as shown in Table 4.13.

Table 4.13: Decrease in average speed per year for different RHD vehicle categories

| Vehicle Category      | Average speed (km/hr) in 2004-2005 | Average speed (km/hr) in 2016-2017 | Change in 11 years (km/hr) | Uniform change per year (km/hr) |
|-----------------------|------------------------------------|------------------------------------|----------------------------|---------------------------------|
| Heavy Truck           | 40                                 | 31                                 | 9                          | 0.818182                        |
| Medium Truck          | 40                                 | 31                                 | 9                          | 0.818182                        |
| Small Truck           | 42                                 | 29                                 | 13                         | 1.181818                        |
| Large Bus             | 45                                 | 37                                 | 8                          | 0.727273                        |
| Mini Bus              | 31                                 | 26                                 | 5                          | 0.454545                        |
| Micro Bus             | 49                                 | 36                                 | 13                         | 1.181818                        |
| Utility (Jeep/Pickup) | 25                                 | 24                                 | 1                          | 0.090909                        |
| Car                   | 39                                 | 33                                 | 6                          | 0.545455                        |
| Tempo                 | 21                                 | 21                                 | 0                          | 0                               |
| Auto Rickshaw         | 27                                 | 17                                 | 10                         | 0.909091                        |
| Motor Cycle           | 22                                 | 22                                 | 0                          | 0                               |

The lifetime mileage of vehicles for each year of analysis was found by calculating the weighted average age of vehicles in the 20 years stock and multiplying them with the annual km travelled by each vehicle as shown:

$$\text{Lifetime mileage (km)} = \Sigma (\text{Age of vehicle} * \text{Stock number}) / 20 \text{ years stock} * \text{Annual km travelled}$$

#### **4.7 Change in Mileage and Activity Information Due to Lockdown**

During the lockdown in 2020 and 2021 due to the corona virus outbreak, there was a significant decrease in annual km travelled by public transport and private passenger vehicles due to online classes and work from home and consequently due to reduction in the amount of vehicles running on the roads, there was a substantial decrease in congestion which caused the speed travelled by the vehicles to increase. In this paper, emission for the year 2020 and 2021 was once calculated using decreased annual km travelled and increased average speed to show the real scenario. Then the emission for the year 2020 and 2021 was again calculated using the average yearly uniform decrease of annual km travelled and average speed as shown above in order to determine the situation if lockdown had not occurred to ultimately compare the two scenarios. The on-road transport activity during the year 2020 was reportedly almost half of the average activity during the year 2019 (Sung and Monschauer, 2020). A study by EMISIA, the founder company of COPERT in March 2021 stated that mileage dropped by 25% for passenger cars with respect to 2019 and there was no change in mileage or activity for LCV's and HDT's (Papadimitriou, 2021). Significant information about changes in transport activity during lockdown in Bangladesh was found from a research paper (Anwari et al., 2021). Considering all practical circumstances in Bangladesh, mileage for public transport vehicles were reduced by 50%, mileage for passenger cars reduced by 25% for 2020 and 2021 with respect to 2019. An average increase of speed during lockdown for all types of vehicles for the year 2020 and 2021 was assumed considering general holidays, online classes conducted by educational institutions, deployment of forces, limitations on religious gathering and temporary shutting down of garments factories (Zafri et al., 2021)

## 4.8 Fuel Characteristics

The fuel characteristics were taken from the Revisions of Vehicular Emission Standards for Bangladesh report (RHD, 2012). Density and Sulfur content of Diesel fuel in Dhaka city, Chittagong city and for the rest of the country were given; density, Lead content and Sulfur content for regular and premium grade Petrol were also given for the years 2012, 2014 and 2019. 2012 was the year of the study, and the values for 2014 and 2019 were proposed standards for the future. Minimum value of fuel density and maximum values of Lead and Sulfur was considered for worst case scenario, and since the proposed standards of Sulfur and Lead content were found to decrease in the future, it was assumed that Sulfur and Lead content decreased at a uniform rate throughout the years. Maximum allowable Reid vapor pressure at 38°C was found to be 10 psi from this report. For the prediction of emissions in 2025, the same fuel specifications were used as that of 2021 assuming that there was no improvement in the fuel quality in order to determine the worst case scenario.

## 4.9 Environmental Information

### 4.9.1 Environmental Information from the Year 2016 to 2021

The data for 2021 was collected from Bangladesh Meteorological Department as shown in Table 4.14.

Table 4.14: Monthly maximum and minimum temperature and humidity for Bangladesh for the year 2021 (Source: Bangladesh Meteorological Department, 2021)

| Month     | Min Temperature (°C) | Max Temperature (°C) | Humidity (%) |
|-----------|----------------------|----------------------|--------------|
| January   | 12.5                 | 25.2                 | 76%          |
| February  | 15.1                 | 27.8                 | 72%          |
| March     | 19.6                 | 31.6                 | 71%          |
| April     | 23.1                 | 33.2                 | 75%          |
| May       | 24.5                 | 32.9                 | 79%          |
| June      | 25.6                 | 31.9                 | 85%          |
| July      | 25.6                 | 31.1                 | 86%          |
| August    | 25.7                 | 31.4                 | 86%          |
| September | 25.4                 | 31.5                 | 85%          |
| October   | 23.6                 | 31.5                 | 83%          |
| November  | 19.2                 | 29.5                 | 79%          |
| December  | 14.2                 | 26.4                 | 77%          |

The monthly maximum and minimum temperature and monthly average humidity from the year 2016 to 2020 was collected for the divisions Dhaka, Chittagong, Rajshahi, Khulna, Sylhet and Barisal and the average was calculated for the whole country as shown in Table 4.15.

Table 4.15: Monthly maximum and minimum temperature and humidity for Bangladesh from 2016 to 2020 (Source: Time and date Official Website, 2022)

| Monthly Maximum Temperature in 2016 (°C) |       |            |          |        |        |         |         |
|------------------------------------------|-------|------------|----------|--------|--------|---------|---------|
| Month                                    | Dhaka | Chittagong | Rajshahi | Khulna | Sylhet | Barisal | Country |
| January                                  | 27    | 29         | 30       | 29     | 29     | 29      | 28.8    |
| February                                 | 35    | 34         | 36       | 35     | 34     | 34      | 34.8    |
| March                                    | 35    | 35         | 37       | 37     | 35     | 35      | 35.8    |
| April                                    | 36    | 36         | 43       | 41     | 36     | 36      | 38.0    |
| May                                      | 37    | 37         | 41       | 40     | 37     | 37      | 38.4    |
| June                                     | 36    | 40         | 40       | 40     | 36     | 36      | 38.4    |
| July                                     | 35    | 36         | 34       | 35     | 35     | 35      | 35.0    |
| August                                   | 36    | 37         | 35       | 36     | 36     | 36      | 36.0    |
| September                                | 35    | 34         | 35       | 35     | 38     | 38      | 35.8    |
| October                                  | 35    | 36         | 35       | 35     | 35     | 35      | 35.2    |
| November                                 | 34    | 37         | 33       | 32     | 34     | 34      | 34.0    |
| December                                 | 30    | 33         | 30       | 29     | 30     | 30      | 30.4    |
| Monthly Minimum Temperature in 2016 (°C) |       |            |          |        |        |         |         |
| Month                                    | Dhaka | Chittagong | Rajshahi | Khulna | Sylhet | Barisal | Country |
| January                                  | 8     | 8          | 11       | 11     | 8      | 8       | 9.2     |
| February                                 | 10    | 10         | 16       | 15     | 10     | 10      | 12.8    |
| March                                    | 16    | 16         | 21       | 22     | 16     | 16      | 17.8    |
| April                                    | 19    | 20         | 21       | 26     | 20     | 20      | 21.0    |
| May                                      | 20    | 21         | 21       | 22     | 21     | 21      | 21.0    |
| June                                     | 23    | 25         | 22       | 21     | 24     | 24      | 23.2    |
| July                                     | 24    | 27         | 25       | 26     | 24     | 24      | 25.0    |
| August                                   | 25    | 24         | 24       | 25     | 24     | 24      | 24.3    |
| September                                | 25    | 26         | 26       | 25     | 25     | 25      | 25.4    |
| October                                  | 20    | 18         | 24       | 23     | 20     | 20      | 20.8    |
| November                                 | 15    | 14         | 16       | 16     | 15     | 15      | 15.2    |
| December                                 | 12    | 12         | 11       | 10     | 12     | 12      | 11.4    |

Table 4.15 (continued)

| Monthly Average Humidity in 2016         |       |            |          |        |        |         |         |
|------------------------------------------|-------|------------|----------|--------|--------|---------|---------|
| Month                                    | Dhaka | Chittagong | Rajshahi | Khulna | Sylhet | Barisal | Country |
| January                                  | 19%   | 77%        | 73%      | 72%    | 77%    | 77%     | 66%     |
| February                                 | 67%   | 73%        | 71%      | 69%    | 73%    | 73%     | 71%     |
| March                                    | 64%   | 71%        | 64%      | 65%    | 71%    | 71%     | 68%     |
| April                                    | 74%   | 78%        | 65%      | 66%    | 78%    | 78%     | 73%     |
| May                                      | 77%   | 81%        | 71%      | 72%    | 81%    | 81%     | 77%     |
| June                                     | 76%   | 64%        | 78%      | 79%    | 80%    | 80%     | 76%     |
| July                                     | 83%   | 30%        | 87%      | 87%    | 86%    | 86%     | 77%     |
| August                                   | 77%   | 71%        | 85%      | 85%    | 81%    | 81%     | 80%     |
| September                                | 81%   | 67%        | 84%      | 83%    | 85%    | 85%     | 81%     |
| October                                  | 77%   | 65%        | 76%      | 75%    | 83%    | 83%     | 77%     |
| November                                 | 77%   | 48%        | 70%      | 70%    | 82%    | 82%     | 72%     |
| December                                 | 79%   | 53%        | 74%      | 73%    | 83%    | 83%     | 74%     |
| Monthly Maximum Temperature in 2017 (°C) |       |            |          |        |        |         |         |
| Month                                    | Dhaka | Chittagong | Rajshahi | Khulna | Sylhet | Barisal | Country |
| January                                  | 32    | 32         | 30       | 29     | 32     | 32      | 31.2    |
| February                                 | 33    | 33         | 33       | 33     | 33     | 33      | 33.0    |
| March                                    | 34    | 34         | 35       | 35     | 34     | 34      | 34.3    |
| April                                    | 36    | 36         | 38       | 38     | 36     | 36      | 36.7    |
| May                                      | 37    | 37         | 39       | 38     | 37     | 37      | 37.5    |
| June                                     | 36    | 36         | 39       | 38     | 36     | 36      | 36.8    |
| July                                     | 36    | 36         | 36       | 35     | 36     | 36      | 35.8    |
| August                                   | 35    | 35         | 39       | 36     | 35     | 35      | 35.8    |
| September                                | 36    | 36         | 36       | 36     | 36     | 36      | 36.0    |
| October                                  | 35    | 35         | 35       | 35     | 35     | 35      | 35.0    |
| November                                 | 34    | 33         | 32       | 32     | 33     | 33      | 32.8    |
| December                                 | 29    | 29         | 29       | 30     | 29     | 29      | 29.2    |

Table 4.15 (continued)

| Monthly Minimum Temperature in 2017 (°C) |       |            |          |        |        |         |         |
|------------------------------------------|-------|------------|----------|--------|--------|---------|---------|
| Month                                    | Dhaka | Chittagong | Rajshahi | Khulna | Sylhet | Barisal | Country |
| January                                  | 7     | 7          | 10       | 10     | 7      | 7       | 8.0     |
| February                                 | 10    | 10         | 15       | 15     | 10     | 10      | 11.7    |
| March                                    | 14    | 14         | 17       | 18     | 14     | 14      | 15.2    |
| April                                    | 19    | 19         | 23       | 23     | 19     | 19      | 20.3    |
| May                                      | 21    | 21         | 23       | 23     | 21     | 21      | 21.7    |
| June                                     | 22    | 23         | 24       | 25     | 23     | 23      | 23.3    |
| July                                     | 25    | 25         | 25       | 25     | 25     | 25      | 25.0    |
| August                                   | 23    | 24         | 25       | 26     | 24     | 24      | 24.3    |
| September                                | 24    | 24         | 24       | 25     | 24     | 24      | 24.2    |
| October                                  | 19    | 19         | 19       | 21     | 19     | 19      | 19.3    |
| November                                 | 15    | 15         | 14       | 14     | 15     | 15      | 14.7    |
| December                                 | 13    | 11         | 11       | 14     | 11     | 11      | 11.8    |
| Monthly Average Humidity in 2017         |       |            |          |        |        |         |         |
| Month                                    | Dhaka | Chittagong | Rajshahi | Khulna | Sylhet | Barisal | Country |
| January                                  | 71%   | 78%        | 68%      | 66%    | 78%    | 78%     | 73%     |
| February                                 | 62%   | 72%        | 63%      | 63%    | 72%    | 72%     | 67%     |
| March                                    | 68%   | 75%        | 68%      | 68%    | 75%    | 75%     | 72%     |
| April                                    | 75%   | 80%        | 71%      | 71%    | 80%    | 80%     | 76%     |
| May                                      | 74%   | 78%        | 70%      | 70%    | 78%    | 78%     | 75%     |
| June                                     | 81%   | 84%        | 79%      | 79%    | 84%    | 84%     | 82%     |
| July                                     | 84%   | 87%        | 86%      | 87%    | 87%    | 87%     | 86%     |
| August                                   | 82%   | 86%        | 85%      | 85%    | 86%    | 86%     | 85%     |
| September                                | 83%   | 87%        | 81%      | 81%    | 87%    | 87%     | 84%     |
| October                                  | 80%   | 85%        | 83%      | 82%    | 85%    | 85%     | 83%     |
| November                                 | 74%   | 80%        | 71%      | 70%    | 80%    | 80%     | 76%     |
| December                                 | 79%   | 84%        | 75%      | 74%    | 84%    | 84%     | 80%     |

Table 4.15 (continued)

| Monthly Maximum Temperature in 2018 (°C) |       |            |          |        |        |         |         |
|------------------------------------------|-------|------------|----------|--------|--------|---------|---------|
| Month                                    | Dhaka | Chittagong | Rajshahi | Khulna | Sylhet | Barisal | Country |
| January                                  | 27    | 27         | 29       | 28     | 27     | 27      | 27.5    |
| February                                 | 34    | 34         | 36       | 34     | 34     | 34      | 34.3    |
| March                                    | 35    | 34         | 37       | 36     | 34     | 34      | 35.0    |
| April                                    | 36    | 36         | 40       | 39     | 36     | 36      | 37.2    |
| May                                      | 36    | 36         | 38       | 38     | 36     | 36      | 36.7    |
| June                                     | 35    | 34         | 41       | 40     | 34     | 34      | 36.3    |
| July                                     | 36    | 36         | 36       | 36     | 36     | 36      | 36.0    |
| August                                   | 36    | 36         | 35       | 36     | 36     | 36      | 35.8    |
| September                                | 36    | 36         | 36       | 36     | 36     | 36      | 36.0    |
| October                                  | 36    | 35         | 38       | 36     | 35     | 35      | 35.8    |
| November                                 | 32    | 32         | 34       | 33     | 32     | 32      | 32.5    |
| December                                 | 29    | 29         | 28       | 34     | 29     | 29      | 29.7    |
| Monthly Minimum Temperature in 2018 (°C) |       |            |          |        |        |         |         |
| Month                                    | Dhaka | Chittagong | Rajshahi | Khulna | Sylhet | Barisal | Country |
| January                                  | 7     | 7          | 9        | 10     | 7      | 7       | 7.8     |
| February                                 | 13    | 13         | 14       | 15     | 13     | 13      | 13.5    |
| March                                    | 15    | 15         | 17       | 20     | 15     | 15      | 16.2    |
| April                                    | 19    | 19         | 20       | 21     | 19     | 19      | 19.5    |
| May                                      | 21    | 20         | 20       | 22     | 20     | 20      | 20.5    |
| June                                     | 23    | 24         | 23       | 25     | 24     | 24      | 23.8    |
| July                                     | 25    | 25         | 25       | 26     | 25     | 25      | 25.2    |
| August                                   | 25    | 25         | 24       | 25     | 25     | 25      | 24.8    |
| September                                | 25    | 25         | 25       | 25     | 25     | 25      | 25.0    |
| October                                  | 20    | 20         | 19       | 20     | 20     | 20      | 19.8    |
| November                                 | 13    | 13         | 16       | 18     | 13     | 13      | 14.3    |
| December                                 | 7     | 8          | 10       | 9      | 8      | 8       | 8.3     |

Table 4.15 (continued)

| Monthly Average Humidity in 2018         |       |            |          |        |        |         |         |
|------------------------------------------|-------|------------|----------|--------|--------|---------|---------|
| Month                                    | Dhaka | Chittagong | Rajshahi | Khulna | Sylhet | Barisal | Country |
| January                                  | 75%   | 81%        | 70%      | 68%    | 81%    | 81%     | 76%     |
| February                                 | 66%   | 75%        | 61%      | 61%    | 75%    | 75%     | 69%     |
| March                                    | 63%   | 70%        | 61%      | 61%    | 70%    | 70%     | 66%     |
| April                                    | 68%   | 75%        | 69%      | 69%    | 75%    | 75%     | 72%     |
| May                                      | 80%   | 84%        | 77%      | 75%    | 84%    | 84%     | 81%     |
| June                                     | 81%   | 85%        | 80%      | 78%    | 85%    | 85%     | 82%     |
| July                                     | 80%   | 84%        | 88%      | 86%    | 84%    | 84%     | 84%     |
| August                                   | 78%   | 83%        | 87%      | 84%    | 83%    | 83%     | 83%     |
| September                                | 76%   | 81%        | 84%      | 81%    | 81%    | 81%     | 81%     |
| October                                  | 74%   | 81%        | 76%      | 73%    | 81%    | 81%     | 78%     |
| November                                 | 69%   | 77%        | 71%      | 69%    | 77%    | 77%     | 73%     |
| December                                 | 71%   | 79%        | 69%      | 68%    | 79%    | 79%     | 74%     |
| Monthly Maximum Temperature in 2019 (°C) |       |            |          |        |        |         |         |
| Month                                    | Dhaka | Chittagong | Rajshahi | Khulna | Sylhet | Barisal | Country |
| January                                  | 30    | 30         | 30       | 29     | 30     | 30      | 29.8    |
| February                                 | 32    | 32         | 35       | 33     | 32     | 32      | 32.7    |
| March                                    | 35    | 35         | 36       | 36     | 35     | 35      | 35.3    |
| April                                    | 37    | 37         | 38       | 38     | 37     | 37      | 37.3    |
| May                                      | 37    | 37         | 40       | 40     | 37     | 37      | 38.0    |
| June                                     | 37    | 37         | 39       | 38     | 37     | 37      | 37.5    |
| July                                     | 36    | 36         | 38       | 37     | 36     | 36      | 36.5    |
| August                                   | 37    | 37         | 36       | 35     | 37     | 37      | 36.5    |
| September                                | 36    | 35         | 35       | 35     | 35     | 35      | 35.2    |
| October                                  | 35    | 34         | 34       | 34     | 34     | 34      | 34.2    |
| November                                 | 33    | 32         | 32       | 31     | 32     | 32      | 32.0    |
| December                                 | 31    | 30         | 29       | 29     | 30     | 30      | 29.8    |

Table 4.15 (continued)

| Monthly Minimum Temperature in 2019 (°C) |       |            |          |        |        |         |         |
|------------------------------------------|-------|------------|----------|--------|--------|---------|---------|
| Month                                    | Dhaka | Chittagong | Rajshahi | Khulna | Sylhet | Barisal | Country |
| January                                  | 9     | 9          | 10       | 12     | 9      | 9       | 9.7     |
| February                                 | 10    | 10         | 12       | 14     | 10     | 10      | 11.0    |
| March                                    | 12    | 11         | 14       | 16     | 11     | 11      | 12.5    |
| April                                    | 17    | 18         | 19       | 20     | 18     | 18      | 18.3    |
| May                                      | 22    | 21         | 21       | 24     | 21     | 21      | 21.7    |
| June                                     | 22    | 23         | 23       | 23     | 23     | 23      | 22.8    |
| July                                     | 23    | 18         | 26       | 26     | 18     | 18      | 21.5    |
| August                                   | 26    | 26         | 24       | 25     | 26     | 26      | 25.5    |
| September                                | 23    | 23         | 23       | 24     | 23     | 23      | 23.2    |
| October                                  | 22    | 22         | 20       | 21     | 22     | 22      | 21.5    |
| November                                 | 16    | 16         | 16       | 18     | 16     | 16      | 16.3    |
| December                                 | 10    | 10         | 9        | 12     | 10     | 10      | 10.2    |
| Monthly Average Humidity in 2019         |       |            |          |        |        |         |         |
| Month                                    | Dhaka | Chittagong | Rajshahi | Khulna | Sylhet | Barisal | Country |
| January                                  | 65%   | 75%        | 66%      | 65%    | 75%    | 75%     | 70%     |
| February                                 | 65%   | 74%        | 65%      | 64%    | 74%    | 74%     | 69%     |
| March                                    | 64%   | 73%        | 69%      | 67%    | 73%    | 73%     | 70%     |
| April                                    | 67%   | 75%        | 74%      | 71%    | 75%    | 75%     | 73%     |
| May                                      | 74%   | 80%        | 79%      | 75%    | 80%    | 80%     | 78%     |
| June                                     | 79%   | 83%        | 81%      | 78%    | 83%    | 83%     | 81%     |
| July                                     | 82%   | 85%        | 83%      | 79%    | 85%    | 85%     | 83%     |
| August                                   | 78%   | 83%        | 88%      | 86%    | 83%    | 83%     | 84%     |
| September                                | 79%   | 84%        | 89%      | 86%    | 84%    | 84%     | 84%     |
| October                                  | 81%   | 86%        | 86%      | 81%    | 86%    | 86%     | 84%     |
| November                                 | 77%   | 83%        | 80%      | 75%    | 83%    | 83%     | 80%     |
| December                                 | 77%   | 84%        | 79%      | 74%    | 84%    | 84%     | 80%     |

Table 4.15 (continued)

| Monthly Maximum Temperature in 2020 (°C) |       |            |          |        |        |         |         |
|------------------------------------------|-------|------------|----------|--------|--------|---------|---------|
| Month                                    | Dhaka | Chittagong | Rajshahi | Khulna | Sylhet | Barisal | Country |
| January                                  | 29    | 30         | 29       | 29     | 30     | 30      | 29.5    |
| February                                 | 32    | 32         | 30       | 30     | 32     | 32      | 31.3    |
| March                                    | 37    | 37         | 36       | 36     | 37     | 37      | 36.7    |
| April                                    | 37    | 37         | 39       | 38     | 37     | 37      | 37.5    |
| May                                      | 37    | 37         | 39       | 38     | 37     | 37      | 37.5    |
| June                                     | 36    | 36         | 37       | 36     | 36     | 36      | 36.2    |
| July                                     | 36    | 36         | 37       | 36     | 36     | 36      | 36.2    |
| August                                   | 36    | 36         | 37       | 36     | 36     | 36      | 36.2    |
| September                                | 37    | 36         | 36       | 36     | 36     | 36      | 36.2    |
| October                                  | 35    | 35         | 40       | 35     | 35     | 35      | 35.8    |
| November                                 | 33    | 33         | 33       | 33     | 33     | 33      | 33.0    |
| December                                 | 30    | 30         | 30       | 30     | 30     | 30      | 30.0    |
| Monthly Minimum Temperature in 2020 (°C) |       |            |          |        |        |         |         |
| Month                                    | Dhaka | Chittagong | Rajshahi | Khulna | Sylhet | Barisal | Country |
| January                                  | 9     | 9          | 10       | 12     | 9      | 9       | 9.7     |
| February                                 | 8     | 8          | 11       | 12     | 8      | 8       | 9.2     |
| March                                    | 15    | 15         | 16       | 17     | 15     | 15      | 15.5    |
| April                                    | 21    | 17         | 20       | 22     | 17     | 17      | 19.0    |
| May                                      | 21    | 21         | 20       | 21     | 21     | 21      | 20.8    |
| June                                     | 24    | 24         | 23       | 24     | 24     | 24      | 23.8    |
| July                                     | 24    | 25         | 24       | 24     | 25     | 25      | 24.5    |
| August                                   | 24    | 25         | 25       | 26     | 25     | 25      | 25.0    |
| September                                | 25    | 25         | 25       | 25     | 25     | 25      | 25.0    |
| October                                  | 23    | 23         | 22       | 23     | 23     | 23      | 22.8    |
| November                                 | 2     | 14         | 14       | 17     | 14     | 14      | 12.5    |
| December                                 | 9     | 9          | 10       | 12     | 9      | 9       | 9.7     |

Table 4.15 (continued)

| Monthly Average Humidity in 2020 |       |            |          |        |        |         |         |
|----------------------------------|-------|------------|----------|--------|--------|---------|---------|
| Month                            | Dhaka | Chittagong | Rajshahi | Khulna | Sylhet | Barisal | Country |
| January                          | 79%   | 86%        | 79%      | 76%    | 86%    | 86%     | 82%     |
| February                         | 66%   | 76%        | 69%      | 65%    | 76%    | 76%     | 71%     |
| March                            | 56%   | 65%        | 69%      | 64%    | 65%    | 65%     | 64%     |
| April                            | 56%   | 71%        | 75%      | 69%    | 71%    | 71%     | 69%     |
| May                              | 72%   | 79%        | 83%      | 76%    | 79%    | 79%     | 78%     |
| June                             | 81%   | 85%        | 87%      | 84%    | 85%    | 85%     | 85%     |
| July                             | 81%   | 86%        | 88%      | 84%    | 86%    | 86%     | 85%     |
| August                           | 77%   | 83%        | 90%      | 87%    | 83%    | 83%     | 84%     |
| September                        | 80%   | 86%        | 89%      | 84%    | 86%    | 86%     | 85%     |
| October                          | 79%   | 85%        | 85%      | 79%    | 85%    | 85%     | 83%     |
| November                         | 70%   | 79%        | 68%      | 66%    | 79%    | 79%     | 74%     |
| December                         | 74%   | 83%        | 73%      | 72%    | 83%    | 83%     | 78%     |

#### 4.9.2 Expected Environmental Information for the Year 2025

The yearly average maximum temperature in Bangladesh is expected to increase by 0.018°C per year and yearly average minimum temperature is expected to increase by 0.015°C per year (Basak et al., 2013). Therefore the monthly normal maximum temperature in 2025 is expected to be 0.072°C greater than that of the year 2021, and the monthly minimum temperature for the year 2025 is expected to be 0.060°C greater than that of the year 2021.

The monthly dew point temperature from the year 2016 to 2021 was calculated using the given formula: (August-Roche-Magnus approximation)

$$T_d = 243.04 \times (\ln(R_h / 100) + ((17.625 \times T) / (243.04 + T))) / (17.625 - \ln(R_h / 100) - ((17.625 \times T) / (243.04 + T)))$$

where,  $T_d$  is the dew point temperature,  $R_h$  is the average humidity of particular month and  $T$  is the average of maximum and minimum temperature observed in particular month. Using the average monthly dew point temperature for 6 years, approximate monthly humidity for 2025 was calculated with the given formula:

$$R_h = 100 \times (\text{EXP}((17.625 \times T_d) / (243.04 + T_d)) / \text{EXP}((17.625 \times T) / (243.04 + T)))$$

The calculation of average yearly dew point  $T_d$  and approximate monthly relative humidity  $R_h$  in 2025 is shown in Table 4.16.

Table 4.16: Calculation of average yearly dew point and approximate  $R_h$  for 2025

| Month     | Dew Point $T_d$ (°C) |       |       |       |       |       | Yearly Average $T_d$ (°C) | $R_h$ for 2025 using average $T_d$ (%) |
|-----------|----------------------|-------|-------|-------|-------|-------|---------------------------|----------------------------------------|
|           | 2016                 | 2017  | 2018  | 2019  | 2020  | 2021  |                           |                                        |
| January   | 12.48                | 14.65 | 13.38 | 14.16 | 16.43 | 14.53 | 14.27                     | 71%                                    |
| February  | 18.20                | 15.99 | 17.84 | 15.97 | 14.89 | 16.19 | 16.51                     | 59%                                    |
| March     | 20.34                | 19.25 | 18.72 | 18.07 | 18.74 | 19.95 | 19.18                     | 68%                                    |
| April     | 24.19                | 23.89 | 22.76 | 22.51 | 21.98 | 23.30 | 23.11                     | 66%                                    |
| May       | 25.27                | 24.61 | 24.93 | 25.58 | 24.94 | 24.70 | 25.00                     | 77%                                    |
| June      | 26.10                | 26.64 | 26.74 | 26.58 | 27.10 | 25.98 | 26.52                     | 84%                                    |
| July      | 25.42                | 27.88 | 27.64 | 25.85 | 27.56 | 25.78 | 26.69                     | 82%                                    |
| August    | 26.33                | 27.28 | 27.12 | 27.87 | 27.54 | 25.98 | 27.02                     | 77%                                    |
| September | 26.95                | 27.15 | 26.80 | 26.25 | 27.81 | 25.68 | 26.77                     | 95%                                    |
| October   | 23.48                | 24.09 | 23.57 | 24.95 | 26.14 | 24.40 | 24.44                     | 81%                                    |
| November  | 19.09                | 19.23 | 18.37 | 20.53 | 17.77 | 20.47 | 19.24                     | 76%                                    |
| December  | 16.13                | 16.93 | 14.30 | 16.51 | 15.89 | 16.14 | 15.98                     | 90%                                    |

The expected environmental information for the year 2025 is summarized in the Table 4.16.

Table 4.17: Expected environmental information in Bangladesh for the year 2025

| Month     | Minimum Temperature (°C) | Maximum Temperature (°C) | Humidity (%) |
|-----------|--------------------------|--------------------------|--------------|
| January   | 12.6                     | 25.3                     | 71%          |
| February  | 15.2                     | 27.9                     | 59%          |
| March     | 19.7                     | 31.7                     | 68%          |
| April     | 23.2                     | 33.3                     | 66%          |
| May       | 24.6                     | 33.0                     | 77%          |
| June      | 25.7                     | 32.0                     | 84%          |
| July      | 25.7                     | 31.2                     | 82%          |
| August    | 25.8                     | 31.5                     | 77%          |
| September | 25.5                     | 31.6                     | 95%          |
| October   | 23.7                     | 31.6                     | 81%          |
| November  | 19.3                     | 29.6                     | 76%          |
| December  | 14.3                     | 26.5                     | 90%          |

#### **4.10 Collection of CO<sub>2</sub> Emission Data from Other Studies**

CO<sub>2</sub> emission from the year 1990 to 2018 in Bangladesh was found from a study made by the World Bank (World Bank, 2018) and the percentage of CO<sub>2</sub> emissions by the transport sector with respect to total fuel combustion from 1971 to 2014 in Bangladesh was found from another study made by the World Bank (World Bank, 2014).

By analysis it was found that emissions calculated in COPERT 5.5 are most highly impacted by the annual mileage and average speed data. Since the vehicle activity and mileage data is the most accurate for the years 2016 and 2017 as it was directly collected from the RUC report 2016-2017 (RHD 2017), it was most compulsory to run analysis for the year 2016 and 2017 to check against the given World Bank data for examining the applicability of this software for Bangladesh. Since the total CO<sub>2</sub> emission data in Bangladesh collected by World Bank is available up to the year 2018, assuming little change in the mileage and activity data in one year, this study checked the vehicular emissions for the three years 2016, 2017 and 2018 against the World Bank data. The recent most data of percentage of CO<sub>2</sub> emissions by the transport sector in Bangladesh collected by World Bank was in 2014, which is equal to 14.2%. Climate Transparency (2020) stated that 15% of the total CO<sub>2</sub> emissions in 2020 Bangladesh was owed to the transport sector. Therefore it was assumed that the percentage of CO<sub>2</sub> emissions by the transport sector in Bangladesh was within the range 14.2%~15% of the total for the years 2016, 2017 and 2018. However, the value of CO<sub>2</sub> emissions from the transport sector includes emissions not only from on-road vehicles but also from the domestic aviation sector, domestic navigation sector, railway sector and pipeline transport sector. The average percent contribution of different sectors of transport in the emission of CO<sub>2</sub> in Bangladesh is shown in Figure 4.1.

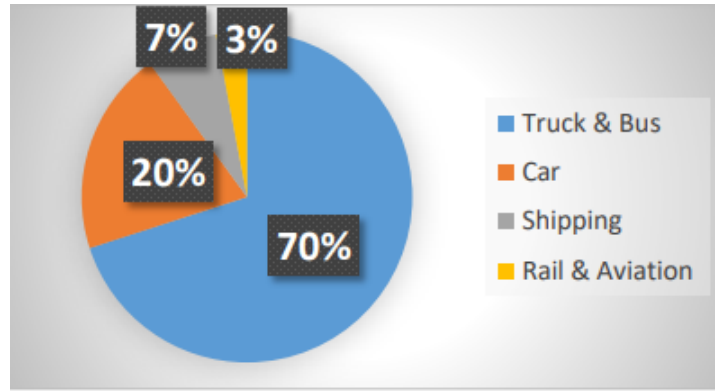

Figure 4.1: Percent contribution of CO<sub>2</sub> emission by different transport sectors  
(Source: Alam, 2019)

So in order to determine the amount of CO<sub>2</sub> emitted by on road vehicles only, it is necessary to deduct 10% (7% from shipping and 3% from rail and aviation). Therefore approximately 90% of the CO<sub>2</sub> emission from the transport sector is owed to on-road vehicles. So the total CO<sub>2</sub> emission of a particular year calculated by COPERT 5.5 was checked against 13.05% (90% of 14.5%) of the total CO<sub>2</sub> emission data from World Bank for that particular year.

#### 4.11 Collection of Emission Factors for Bangladesh from Other Sources to Compare with the Emission Factors Generated by COPERT 5.5

Emission factors for CO<sub>2</sub> were found from the Bangladesh Air Pollution Studies report (Randall et al., 2015) as shown in Table 4.18.

Table 4.18: Emission factor for CO<sub>2</sub> from the BAPS report (Source: Randall et al., 2015)

| Vehicle Type     | Emission factor for CO <sub>2</sub> (g/km) |
|------------------|--------------------------------------------|
| CNG bus 01-05    | 557                                        |
| CNG bus 96-2000  | 557                                        |
| Pass Car CNG     | 143.54                                     |
| CNG taxi         | 196                                        |
| Diesel bus 01-05 | 757                                        |
| Diesel truck     | 706                                        |
| Car EURO 3 D     | 237                                        |
| Car EURO 3 G     | 242                                        |
| Car EURO 4 D     | 148.76                                     |
| Car EURO 4 G     | 172.95                                     |
| MC-4 strokes     | 33                                         |
| Minibus          | 306                                        |

## **CHAPTER 5**

### **RESULTS AND ANALYSIS**

#### **5.1 Introduction**

This chapter comprises of the current emission factors for different pollutants and different vehicles in Bangladesh generated by COPERT 5.5 which was checked against a similar study made by the DOE, the vehicular emission inventory of major pollutants in Bangladesh for the year 2016 to 2021, a likely scenario of the emissions in the years 2020 and 2021 if lockdown had not occurred and the percentage reduction in emission owed to the covid-19 lockdown. Furthermore, this chapter comprises of a comparative analysis of the emission characteristics of different types of vehicles and finally a prediction of emissions made for the year 2025.

#### **5.2 Emission Factors Generated by COPERT 5.5**

At first, COPERT 5.5 generated emission factors of each vehicle type using their average speeds, average trip length, temperature, humidity, etc. These coefficients are then used by the software to calculate emissions. Emission factors for 13 major pollutants and greenhouse gases are shown in Table 5.1.

Table 5.1: Emission factors generated by COPERT 5.5 (Unit: gm/km)

| <b>RHD Class</b> | <b>Fuel</b> | <b>Euro Standard</b> | <b>CH<sub>4</sub></b> | <b>CO</b> | <b>CO<sub>2</sub></b> | <b>N<sub>2</sub>O</b> | <b>NH<sub>3</sub></b> | <b>NM-VOC</b> | <b>NO</b> | <b>NO<sub>2</sub></b> | <b>NO<sub>x</sub></b> | <b>PM 10</b> | <b>PM 2.5</b> | <b>SO<sub>2</sub></b> | <b>VOC</b> |
|------------------|-------------|----------------------|-----------------------|-----------|-----------------------|-----------------------|-----------------------|---------------|-----------|-----------------------|-----------------------|--------------|---------------|-----------------------|------------|
| Auto Rickshaw    | Petrol      | Euro 4               | 0.020                 | 0.207     | 238.56                | 0.005                 | 0.027                 | 0.094         | 0.097     | 0.003                 | 0.100                 | 0.030        | 0.016         | 0.022                 | 0.112      |
|                  |             | Euro 5               | 0.020                 | 0.315     | 238.56                | 0.002                 | 0.015                 | 0.092         | 0.056     | 0.002                 | 0.058                 | 0.031        | 0.018         | 0.022                 | 0.109      |
|                  |             | Euro 6 a/b/c         | 0.020                 | 0.306     | 238.54                | 0.002                 | 0.015                 | 0.092         | 0.057     | 0.001                 | 0.058                 | 0.030        | 0.016         | 0.022                 | 0.109      |
|                  | CNG Bifuel  | Euro 4               | 0.041                 | 0.209     | 267.11                | 0.002                 | 0.026                 | 0.026         | 0.097     | 0.003                 | 0.100                 | 0.029        | 0.016         | 0.000                 | 0.067      |
|                  |             | Euro 5               | 0.041                 | 0.209     | 267.11                | 0.002                 | 0.015                 | 0.026         | 0.076     | 0.002                 | 0.078                 | 0.029        | 0.016         | 0.000                 | 0.067      |
|                  |             | Euro 6 a/b/c         | 0.041                 | 0.209     | 267.09                | 0.002                 | 0.015                 | 0.026         | 0.077     | 0.002                 | 0.078                 | 0.029        | 0.016         | 0.000                 | 0.067      |
|                  |             | Euro 6 d-temp        | 0.041                 | 0.209     | 267.08                | 0.002                 | 0.015                 | 0.026         | 0.077     | 0.002                 | 0.078                 | 0.029        | 0.016         | 0.000                 | 0.067      |
| Tempo            | Petrol      | Euro 3               | 0.028                 | 0.734     | 223.08                | 0.006                 | 0.030                 | 0.083         | 0.114     | 0.004                 | 0.117                 | 0.029        | 0.016         | 0.020                 | 0.111      |
|                  |             | Euro 4               | 0.020                 | 0.233     | 237.08                | 0.005                 | 0.030                 | 0.066         | 0.092     | 0.003                 | 0.095                 | 0.029        | 0.016         | 0.022                 | 0.085      |
|                  |             | Euro 5               | 0.020                 | 0.319     | 237.08                | 0.002                 | 0.016                 | 0.062         | 0.055     | 0.002                 | 0.057                 | 0.031        | 0.018         | 0.022                 | 0.082      |
|                  |             | Euro 6 a/b/c         | 0.020                 | 0.307     | 237.06                | 0.002                 | 0.016                 | 0.062         | 0.056     | 0.001                 | 0.057                 | 0.030        | 0.016         | 0.022                 | 0.082      |
|                  | Diesel      | Euro 3               | 0.002                 | 0.172     | 206.96                | 0.008                 | 0.001                 | 0.029         | 0.665     | 0.222                 | 0.887                 | 0.065        | 0.052         | 0.061                 | 0.029      |
|                  |             | Euro 4               | 0.001                 | 0.183     | 206.96                | 0.008                 | 0.001                 | 0.023         | 0.338     | 0.413                 | 0.750                 | 0.064        | 0.050         | 0.061                 | 0.023      |
|                  |             | Euro 5               | 0.000                 | 0.058     | 206.96                | 0.008                 | 0.002                 | 0.002         | 0.424     | 0.282                 | 0.706                 | 0.029        | 0.016         | 0.061                 | 0.002      |
|                  |             | Euro 6 a/b/c         | 0.000                 | 0.058     | 206.93                | 0.007                 | 0.007                 | 0.001         | 0.447     | 0.192                 | 0.639                 | 0.029        | 0.016         | 0.061                 | 0.001      |
|                  | CNG Bifuel  | Euro 4               | 0.039                 | 0.223     | 214.24                | 0.002                 | 0.026                 | 0.024         | 0.092     | 0.003                 | 0.095                 | 0.029        | 0.016         | 0.000                 | 0.063      |
|                  |             | Euro 5               | 0.039                 | 0.223     | 214.24                | 0.002                 | 0.016                 | 0.024         | 0.073     | 0.002                 | 0.076                 | 0.029        | 0.016         | 0.000                 | 0.063      |
|                  |             | Euro 6 a/b/c         | 0.039                 | 0.223     | 214.22                | 0.002                 | 0.016                 | 0.024         | 0.074     | 0.002                 | 0.076                 | 0.029        | 0.016         | 0.000                 | 0.063      |
|                  |             | Euro 6 d-temp        | 0.039                 | 0.223     | 214.21                | 0.002                 | 0.016                 | 0.024         | 0.074     | 0.002                 | 0.076                 | 0.029        | 0.016         | 0.000                 | 0.063      |

Table 5.1: Emission factors generated by COPERT 5.5 (Unit: gm/km) (continued)

| <b>RHD Class</b>       | <b>Fuel</b> | <b>Euro Standard</b> | <b>CH<sub>4</sub></b> | <b>CO</b> | <b>CO<sub>2</sub></b> | <b>N<sub>2</sub>O</b> | <b>NH<sub>3</sub></b> | <b>NM-VOC</b> | <b>NO</b> | <b>NO<sub>2</sub></b> | <b>NO<sub>x</sub></b> | <b>PM 10</b> | <b>PM 2.5</b> | <b>SO<sub>2</sub></b> | <b>VOC</b> |
|------------------------|-------------|----------------------|-----------------------|-----------|-----------------------|-----------------------|-----------------------|---------------|-----------|-----------------------|-----------------------|--------------|---------------|-----------------------|------------|
| Car                    | Petrol      | Euro 3               | 0.028                 | 0.720     | 225.72                | 0.005                 | 0.029                 | 0.068         | 0.130     | 0.004                 | 0.134                 | 0.029        | 0.016         | 0.021                 | 0.096      |
|                        |             | Euro 4               | 0.020                 | 0.242     | 230.05                | 0.005                 | 0.029                 | 0.051         | 0.092     | 0.003                 | 0.095                 | 0.029        | 0.016         | 0.021                 | 0.072      |
|                        |             | Euro 5               | 0.020                 | 0.310     | 230.05                | 0.002                 | 0.016                 | 0.047         | 0.061     | 0.002                 | 0.063                 | 0.031        | 0.018         | 0.021                 | 0.067      |
|                        |             | Euro 6 a/b/c         | 0.020                 | 0.294     | 230.03                | 0.002                 | 0.016                 | 0.047         | 0.062     | 0.001                 | 0.063                 | 0.030        | 0.016         | 0.021                 | 0.067      |
|                        | CNG Bifuel  | Euro 4               | 0.039                 | 0.242     | 182.23                | 0.002                 | 0.026                 | 0.025         | 0.092     | 0.003                 | 0.095                 | 0.029        | 0.016         | 0.000                 | 0.063      |
|                        |             | Euro 5               | 0.039                 | 0.242     | 182.23                | 0.002                 | 0.016                 | 0.025         | 0.076     | 0.002                 | 0.079                 | 0.029        | 0.016         | 0.000                 | 0.063      |
|                        |             | Euro 6 a/b/c         | 0.039                 | 0.242     | 182.20                | 0.002                 | 0.016                 | 0.025         | 0.077     | 0.002                 | 0.079                 | 0.029        | 0.016         | 0.000                 | 0.063      |
|                        |             | Euro 6 d-temp        | 0.039                 | 0.242     | 182.19                | 0.002                 | 0.016                 | 0.025         | 0.077     | 0.002                 | 0.079                 | 0.029        | 0.016         | 0.000                 | 0.063      |
| Utility (Jeep/ Pickup) | Petrol      | Euro 3               | 0.028                 | 0.634     | 315.79                | 0.005                 | 0.027                 | 0.070         | 0.107     | 0.003                 | 0.110                 | 0.029        | 0.016         | 0.029                 | 0.098      |
|                        |             | Euro 4               | 0.020                 | 0.208     | 381.90                | 0.005                 | 0.027                 | 0.056         | 0.085     | 0.003                 | 0.088                 | 0.029        | 0.016         | 0.035                 | 0.074      |
|                        |             | Euro 5               | 0.020                 | 0.288     | 381.90                | 0.002                 | 0.014                 | 0.051         | 0.050     | 0.002                 | 0.052                 | 0.031        | 0.018         | 0.035                 | 0.070      |
|                        |             | Euro 6 a/b/c         | 0.020                 | 0.275     | 381.88                | 0.002                 | 0.014                 | 0.051         | 0.051     | 0.001                 | 0.052                 | 0.030        | 0.016         | 0.035                 | 0.070      |
|                        | Diesel      | Euro 3               | 0.002                 | 0.160     | 270.71                | 0.008                 | 0.001                 | 0.056         | 0.636     | 0.212                 | 0.848                 | 0.064        | 0.050         | 0.080                 | 0.057      |
|                        |             | Euro 4               | 0.001                 | 0.165     | 270.71                | 0.008                 | 0.001                 | 0.020         | 0.322     | 0.394                 | 0.716                 | 0.063        | 0.049         | 0.080                 | 0.021      |
|                        |             | Euro 5               | 0.000                 | 0.056     | 270.71                | 0.008                 | 0.002                 | 0.001         | 0.406     | 0.271                 | 0.676                 | 0.029        | 0.016         | 0.080                 | 0.001      |
|                        |             | Euro 6 a/b/c         | 0.000                 | 0.056     | 270.68                | 0.007                 | 0.007                 | 0.001         | 0.429     | 0.184                 | 0.612                 | 0.029        | 0.016         | 0.080                 | 0.001      |
|                        | CNG Bifuel  | Euro 4               | 0.039                 | 0.227     | 203.60                | 0.002                 | 0.026                 | 0.024         | 0.090     | 0.003                 | 0.093                 | 0.029        | 0.016         | 0.000                 | 0.063      |
|                        |             | Euro 5               | 0.039                 | 0.227     | 203.60                | 0.002                 | 0.014                 | 0.024         | 0.072     | 0.002                 | 0.075                 | 0.029        | 0.016         | 0.000                 | 0.063      |
|                        |             | Euro 6 a/b/c         | 0.039                 | 0.227     | 203.58                | 0.002                 | 0.014                 | 0.024         | 0.073     | 0.001                 | 0.075                 | 0.029        | 0.016         | 0.000                 | 0.063      |
|                        |             | Euro 6 d-temp        | 0.039                 | 0.227     | 203.57                | 0.002                 | 0.014                 | 0.024         | 0.073     | 0.001                 | 0.075                 | 0.030        | 0.016         | 0.000                 | 0.063      |

Table 5.1: Emission factors generated by COPERT 5.5 (Unit: gm/km) (continued)

| <b>RHD Class</b> | <b>Fuel</b> | <b>Euro Standard</b> | <b>CH<sub>4</sub></b> | <b>CO</b> | <b>CO<sub>2</sub></b> | <b>N<sub>2</sub>O</b> | <b>NH<sub>3</sub></b> | <b>NMVOC</b> | <b>NO</b> | <b>NO<sub>2</sub></b> | <b>NO<sub>x</sub></b> | <b>PM<sub>10</sub></b> | <b>PM<sub>2.5</sub></b> | <b>SO<sub>2</sub></b> | <b>VOC</b> |
|------------------|-------------|----------------------|-----------------------|-----------|-----------------------|-----------------------|-----------------------|--------------|-----------|-----------------------|-----------------------|------------------------|-------------------------|-----------------------|------------|
| Small Truck      | Diesel      | Euro 3               | 0.018                 | 0.719     | 346.92                | 0.006                 | 0.002                 | 0.142        | 1.765     | 0.364                 | 2.129                 | 0.154                  | 0.116                   | 0.102                 | 0.159      |
|                  |             | Euro 4               | 0.001                 | 0.427     | 332.17                | 0.007                 | 0.002                 | 0.031        | 1.071     | 0.404                 | 1.475                 | 0.103                  | 0.065                   | 0.098                 | 0.033      |
|                  |             | Euro 5               | 0.001                 | 0.331     | 311.62                | 0.013                 | 0.006                 | 0.011        | 1.613     | 0.390                 | 2.002                 | 0.076                  | 0.039                   | 0.092                 | 0.012      |
|                  |             | Euro 6<br>a/b/c      | 0.001                 | 0.050     | 315.08                | 0.012                 | 0.008                 | 0.008        | 0.512     | 0.170                 | 0.683                 | 0.076                  | 0.038                   | 0.093                 | 0.009      |
| Medium Truck     | Diesel      | Euro III             | 0.084                 | 2.046     | 788.97                | 0.005                 | 0.003                 | 0.392        | 6.093     | 0.992                 | 7.085                 | 0.298                  | 0.243                   | 0.232                 | 0.476      |
|                  |             | Euro IV              | 0.005                 | 0.997     | 722.91                | 0.012                 | 0.003                 | 0.051        | 3.940     | 0.641                 | 4.582                 | 0.147                  | 0.092                   | 0.213                 | 0.056      |
|                  |             | Euro V               | 0.005                 | 1.500     | 719.76                | 0.033                 | 0.011                 | 0.050        | 5.759     | 0.640                 | 6.399                 | 0.110                  | 0.055                   | 0.212                 | 0.055      |
|                  |             | Euro VI<br>A/B/C     | 0.005                 | 0.192     | 718.70                | 0.036                 | 0.009                 | 0.036        | 0.556     | 0.062                 | 0.618                 | 0.110                  | 0.055                   | 0.212                 | 0.041      |
| Heavy Truck      | Diesel      | Euro II              | 0.090                 | 1.997     | 954.60                | 0.009                 | 0.003                 | 0.518        | 9.627     | 1.190                 | 10.817                | 0.329                  | 0.271                   | 0.281                 | 0.607      |
|                  |             | Euro III             | 0.084                 | 2.525     | 1001.59               | 0.005                 | 0.003                 | 0.484        | 7.611     | 1.239                 | 8.850                 | 0.353                  | 0.295                   | 0.295                 | 0.567      |
|                  |             | Euro IV              | 0.005                 | 1.201     | 932.47                | 0.012                 | 0.003                 | 0.067        | 5.015     | 0.816                 | 5.832                 | 0.167                  | 0.109                   | 0.274                 | 0.072      |
|                  |             | Euro V               | 0.005                 | 1.827     | 927.31                | 0.033                 | 0.011                 | 0.062        | 6.539     | 0.727                 | 7.265                 | 0.120                  | 0.062                   | 0.273                 | 0.067      |
| Micro Bus        | Diesel      | Euro III             | 0.074                 | 1.504     | 699.30                | 0.003                 | 0.003                 | 0.244        | 5.513     | 0.897                 | 6.411                 | 0.240                  | 0.185                   | 0.205                 | 0.317      |
|                  |             | Euro IV              | 0.004                 | 0.799     | 646.56                | 0.006                 | 0.003                 | 0.039        | 3.499     | 0.570                 | 4.069                 | 0.142                  | 0.087                   | 0.190                 | 0.043      |
|                  |             | Euro V               | 0.004                 | 1.346     | 630.77                | 0.017                 | 0.011                 | 0.034        | 3.904     | 0.434                 | 4.338                 | 0.110                  | 0.055                   | 0.185                 | 0.038      |
|                  |             | Euro VI<br>A/B/C     | 0.004                 | 0.159     | 643.01                | 0.021                 | 0.009                 | 0.024        | 0.287     | 0.032                 | 0.319                 | 0.110                  | 0.055                   | 0.189                 | 0.028      |

Table 5.1: Emission factors generated by COPERT 5.5 (Unit: gm/km) (continued)

| <b>RHD Class</b> | <b>Fuel</b> | <b>Euro Standard</b> | <b>CH<sub>4</sub></b> | <b>CO</b> | <b>CO<sub>2</sub></b> | <b>N<sub>2</sub>O</b> | <b>NH<sub>3</sub></b> | <b>NM-VOC</b> | <b>NO</b> | <b>NO<sub>2</sub></b> | <b>NO<sub>x</sub></b> | <b>PM<sub>10</sub></b> | <b>PM<sub>2.5</sub></b> | <b>SO<sub>2</sub></b> | <b>VOC</b> |
|------------------|-------------|----------------------|-----------------------|-----------|-----------------------|-----------------------|-----------------------|---------------|-----------|-----------------------|-----------------------|------------------------|-------------------------|-----------------------|------------|
| Mini Bus         | Diesel      | Euro II              | 0.081                 | 2.323     | 999.51                | 0.006                 | 0.003                 | 0.477         | 10.073    | 1.245                 | 11.318                | 0.314                  | 0.258                   | 0.294                 | 0.558      |
|                  |             | Euro III             | 0.074                 | 2.599     | 1048.70               | 0.003                 | 0.003                 | 0.446         | 8.547     | 1.391                 | 9.938                 | 0.312                  | 0.256                   | 0.308                 | 0.520      |
|                  |             | Euro IV              | 0.004                 | 1.254     | 974.02                | 0.006                 | 0.003                 | 0.067         | 5.311     | 0.865                 | 6.176                 | 0.160                  | 0.105                   | 0.286                 | 0.070      |
|                  |             | Euro V               | 0.004                 | 2.161     | 945.05                | 0.017                 | 0.011                 | 0.055         | 6.133     | 0.681                 | 6.814                 | 0.110                  | 0.055                   | 0.278                 | 0.059      |
|                  | CNG         | Euro I               | 6.800                 | 8.400     | 1525.19               | 0.000                 | 0.000                 | 0.200         | 15.840    | 0.660                 | 16.500                | 0.115                  | 0.060                   | 0.000                 | 7.000      |
|                  |             | Euro II              | 4.500                 | 2.700     | 1415.46               | 0.000                 | 0.000                 | 0.200         | 14.400    | 0.600                 | 15.000                | 0.113                  | 0.057                   | 0.000                 | 4.700      |
|                  |             | Euro III             | 1.280                 | 1.000     | 1250.86               | 0.000                 | 0.000                 | 0.020         | 9.600     | 0.400                 | 10.000                | 0.113                  | 0.057                   | 0.000                 | 1.300      |
|                  |             | EEV                  | 0.980                 | 0.870     | 1041.50               | 0.000                 | 0.000                 | 0.000         | 3.565     | 0.149                 | 3.713                 | 0.121                  | 0.065                   | 0.000                 | 0.893      |
| Large Bus        | Diesel      | Euro III             | 0.074                 | 2.415     | 994.32                | 0.005                 | 0.003                 | 0.528         | 7.667     | 1.248                 | 8.915                 | 0.342                  | 0.286                   | 0.293                 | 0.602      |
|                  |             | Euro IV              | 0.004                 | 1.295     | 948.47                | 0.012                 | 0.003                 | 0.071         | 5.031     | 0.819                 | 5.850                 | 0.160                  | 0.104                   | 0.279                 | 0.075      |
|                  |             | Euro V               | 0.004                 | 2.035     | 933.11                | 0.033                 | 0.011                 | 0.065         | 6.618     | 0.735                 | 7.353                 | 0.110                  | 0.055                   | 0.275                 | 0.069      |
|                  |             | Euro VI A/B/C        | 0.004                 | 0.315     | 950.80                | 0.036                 | 0.009                 | 0.048         | 0.602     | 0.067                 | 0.669                 | 0.110                  | 0.055                   | 0.280                 | 0.051      |
| Motorcycle       | Petrol      | Euro 1               | 0.140                 | 12.223    | 84.12                 | 0.002                 | 0.002                 | 1.487         | 0.243     | 0.010                 | 0.253                 | 0.033                  | 0.027                   | 0.008                 | 1.627      |
|                  |             | Euro 2               | 0.114                 | 4.592     | 76.83                 | 0.002                 | 0.002                 | 0.544         | 0.219     | 0.009                 | 0.228                 | 0.018                  | 0.012                   | 0.007                 | 0.658      |
|                  |             | Euro 3               | 0.056                 | 0.689     | 63.21                 | 0.002                 | 0.002                 | 0.084         | 0.079     | 0.003                 | 0.082                 | 0.018                  | 0.012                   | 0.006                 | 0.130      |
|                  |             | Euro 4               | 0.056                 | 0.519     | 60.37                 | 0.002                 | 0.002                 | 0.090         | 0.027     | 0.001                 | 0.028                 | 0.014                  | 0.008                   | 0.006                 | 0.143      |

The emission factors generated by COPERT 5.5 were checked against that from the recent most study done in Bangladesh (Randall et al., 2015) which is shown in Table 5.2.

Table 5.2: Comparison between emission factors generated by COPERT 5.5 and emission factors from the recent most study done in Bangladesh (Source: Randall et al., 2015).

| Vehicle Type from the major study | Corresponding Vehicle type in COPERT 5.5               | Emission factor for CO <sub>2</sub> (g/km) from the major study | COPERT 5.5 emission factor for CO <sub>2</sub> (g/km) |
|-----------------------------------|--------------------------------------------------------|-----------------------------------------------------------------|-------------------------------------------------------|
| CNG bus 01-05                     | Buses- CNG-Urban CNG buses- Euro 2                     | 557                                                             | 1415.4588                                             |
| CNG bus 96-2000                   | Buses- CNG-Urban CNG buses- Euro 1                     | 557                                                             | 1525.1914                                             |
| Pass Car CNG                      | Passenger Cars CNG Bifuel total                        | 143.54                                                          | 215.1227                                              |
| CNG taxi                          | Passenger Cars CNG Bifuel- Mini-total                  | 196                                                             | 267.0967                                              |
| Diesel bus 01-05                  | Buses- Diesel- Urban buses standard 15-18tonne Euro 2  | 757                                                             | 999.5083                                              |
| Diesel truck                      | Heavy duty trucks- Diesel -Rigid 20-26tonne total      | 706                                                             | 946.1169                                              |
| Car EURO 3 D                      | Passenger car- Diesel- Large SUV Executive- Euro 3     | 237                                                             | 270.7102                                              |
| Car EURO 3 G                      | Passenger car- Petrol- Large SUV Executive-Euro 3      | 242                                                             | 315.7910                                              |
| Car EURO 4 D                      | Passenger car- Diesel- Small- Euro 4                   | 148.76                                                          | 206.9593                                              |
| Car EURO 4 G                      | Passenger car- Petrol- Small- Euro 4                   | 172.95                                                          | 237.0829                                              |
| MC-4 strokes                      | Motorcycle 4 stroke <250cm <sup>3</sup> total : Petrol | 33                                                              | 64.5253                                               |
| Minibus                           | Urban buses midi <15tonne total                        | 306                                                             | 646.7990                                              |

The emission factors generated by COPERT 5.5 were found to be much greater than the emission factors found by the report. This could be due to the effect of age and lifetime mileage of the vehicles. The emission factors from the report were found during the year 2009 and the same vehicle technologies are not being produced anymore hence a certain lifetime mileage was given as an input in the analysis of current times by COPERT 5.5 thus resulting in greater emission factors. Another possible reason for this discrepancy could be the consideration of effect of temperature and humidity in the analysis of COPERT 5.5 which was not considered in the report (Baidya, 2009). However, it was not possible to compare the emission factors for vehicles from the year 1991 to 1995 because the emission factors generated by COPERT 5.5 are for the present times, and the analysis was carried out assuming that vehicles running in Bangladesh currently are no more than 20 years old. Also, the vehicle classifications found in the report are different from that of the RUC report, BRTA classifications and also from the COPERT 5.5 classifications so the synchronization of vehicle types between the report and COPERT 5.5 was carried out by using best judgment.

### **5.3 Emission Inventories**

The quantity of 13 major pollutants, namely CO<sub>2</sub>, CO, CH<sub>4</sub>, NO<sub>x</sub>, SO<sub>2</sub>, PM 10, PM 2.5, NO<sub>2</sub>, N<sub>2</sub>O, NH<sub>3</sub>, NO, VOC and NVOC emitted throughout the years by Auto Rickshaw, Tempo, Car, Utility (Jeep/Pickup), Small Truck, Medium Truck, Heavy truck, Micro bus, Minibus, Large bus and Motorcycles were found for the years 2016, 2017, 2018, 2019, 2020 and 2021 which are represented in tabular format and bar diagrams.

### 5.3.1 Emission Inventory for the Year 2016

The emission inventory for the year 2016 calculated by COPERT is shown in Table 5.3.

Table 5.3: Emission inventory for the year 2016

| <b>Vehicle Category</b> | <b>CO<sub>2</sub> (t)</b> | <b>CO (t)</b>     | <b>CH<sub>4</sub> (t)</b> | <b>NO<sub>x</sub> (t)</b> | <b>SO<sub>2</sub> (t)</b> |
|-------------------------|---------------------------|-------------------|---------------------------|---------------------------|---------------------------|
| Auto Rickshaw           | 44202.900                 | 66.525            | 4.715                     | 14.952                    | 9.692                     |
| Tempo                   | 51025.735                 | 35.078            | 1.385                     | 130.006                   | 32.877                    |
| Car                     | 79451.320                 | 127.457           | 8.039                     | 29.472                    | 17.424                    |
| Jeep/Pickup             | 203591.694                | 79.082            | 2.896                     | 401.604                   | 138.287                   |
| Small Truck             | 1540979.430               | 1071.717          | 10.183                    | 6185.452                  | 1268.617                  |
| Medium Truck            | 1053531.937               | 1258.953          | 20.947                    | 5051.098                  | 868.103                   |
| Heavy Truck             | 1649299.762               | 2965.437          | 46.217                    | 12574.341                 | 1359.234                  |
| Micro Bus               | 342945.132                | 393.977           | 5.614                     | 1398.627                  | 282.092                   |
| Mini Bus                | 141820.108                | 275.413           | 3.568                     | 1067.798                  | 116.662                   |
| Large Bus               | 2433854.169               | 2961.381          | 34.511                    | 10940.813                 | 2005.664                  |
| Motorcycle              | 2037383.385               | 51490.713         | 2329.245                  | 2682.426                  | 446.714                   |
| <b>Total (t)</b>        | <b>9578085.572</b>        | <b>60725.733</b>  | <b>2467.320</b>           | <b>40476.589</b>          | <b>6545.365</b>           |
| <b>Vehicle Category</b> | <b>PM 10 (t)</b>          | <b>PM 2.5 (t)</b> | <b>NO<sub>2</sub> (t)</b> | <b>N<sub>2</sub>O (t)</b> | <b>NH<sub>3</sub> (t)</b> |
| Auto Rickshaw           | 7.204                     | 3.987             | 0.381                     | 0.566                     | 4.188                     |
| Tempo                   | 8.829                     | 5.461             | 46.111                    | 0.890                     | 1.785                     |
| Car                     | 11.690                    | 6.447             | 0.800                     | 1.165                     | 7.886                     |
| Jeep/Pickup             | 25.495                    | 15.135            | 143.332                   | 2.808                     | 4.380                     |
| Small Truck             | 450.908                   | 247.511           | 1382.874                  | 52.886                    | 32.196                    |
| Medium Truck            | 207.994                   | 120.685           | 582.471                   | 45.015                    | 12.933                    |
| Heavy Truck             | 342.902                   | 231.497           | 1486.865                  | 39.015                    | 12.553                    |
| Micro Bus               | 72.568                    | 40.295            | 164.109                   | 9.033                     | 4.804                     |
| Mini Bus                | 26.828                    | 18.380            | 129.317                   | 1.540                     | 0.971                     |
| Large Bus               | 402.779                   | 251.097           | 1338.786                  | 70.786                    | 20.105                    |
| Motorcycle              | 570.939                   | 356.630           | 107.297                   | 69.394                    | 69.394                    |
| <b>Total (t)</b>        | <b>2128.136</b>           | <b>1297.125</b>   | <b>5382.343</b>           | <b>293.098</b>            | <b>171.197</b>            |

Table 5.3: Emission inventory for the year 2016 (continued)

| Vehicle Category | NO (t)           | VOC (t)          | NMVOC (t)       |
|------------------|------------------|------------------|-----------------|
| Auto Rickshaw    | 14.571           | 24.212           | 20.453          |
| Tempo            | 83.895           | 7.607            | 6.426           |
| Car              | 28.672           | 27.192           | 19.408          |
| Jeep/Pickup      | 258.272          | 12.831           | 10.587          |
| Small Truck      | 4802.578         | 105.200          | 95.016          |
| Medium Truck     | 4468.626         | 127.906          | 106.959         |
| Heavy Truck      | 11087.476        | 317.539          | 271.322         |
| Micro Bus        | 1234.518         | 28.946           | 23.332          |
| Mini Bus         | 938.481          | 26.505           | 22.938          |
| Large Bus        | 9602.027         | 321.528          | 287.017         |
| Motorcycle       | 2575.129         | 9148.731         | 7051.821        |
| <b>Total (t)</b> | <b>35094.246</b> | <b>10148.197</b> | <b>7915.279</b> |

The quantity of emission of pollutants by different types of vehicles in the year 2016 is represented via bar diagrams in Figure 5.1.

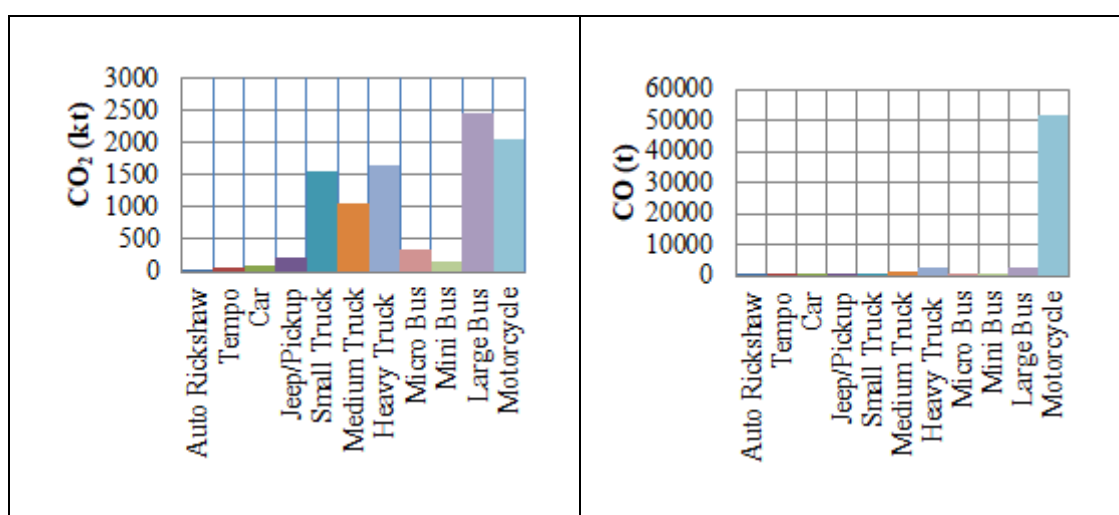

Figure 5.1: Emission of pollutants by different types of vehicles in the year 2016

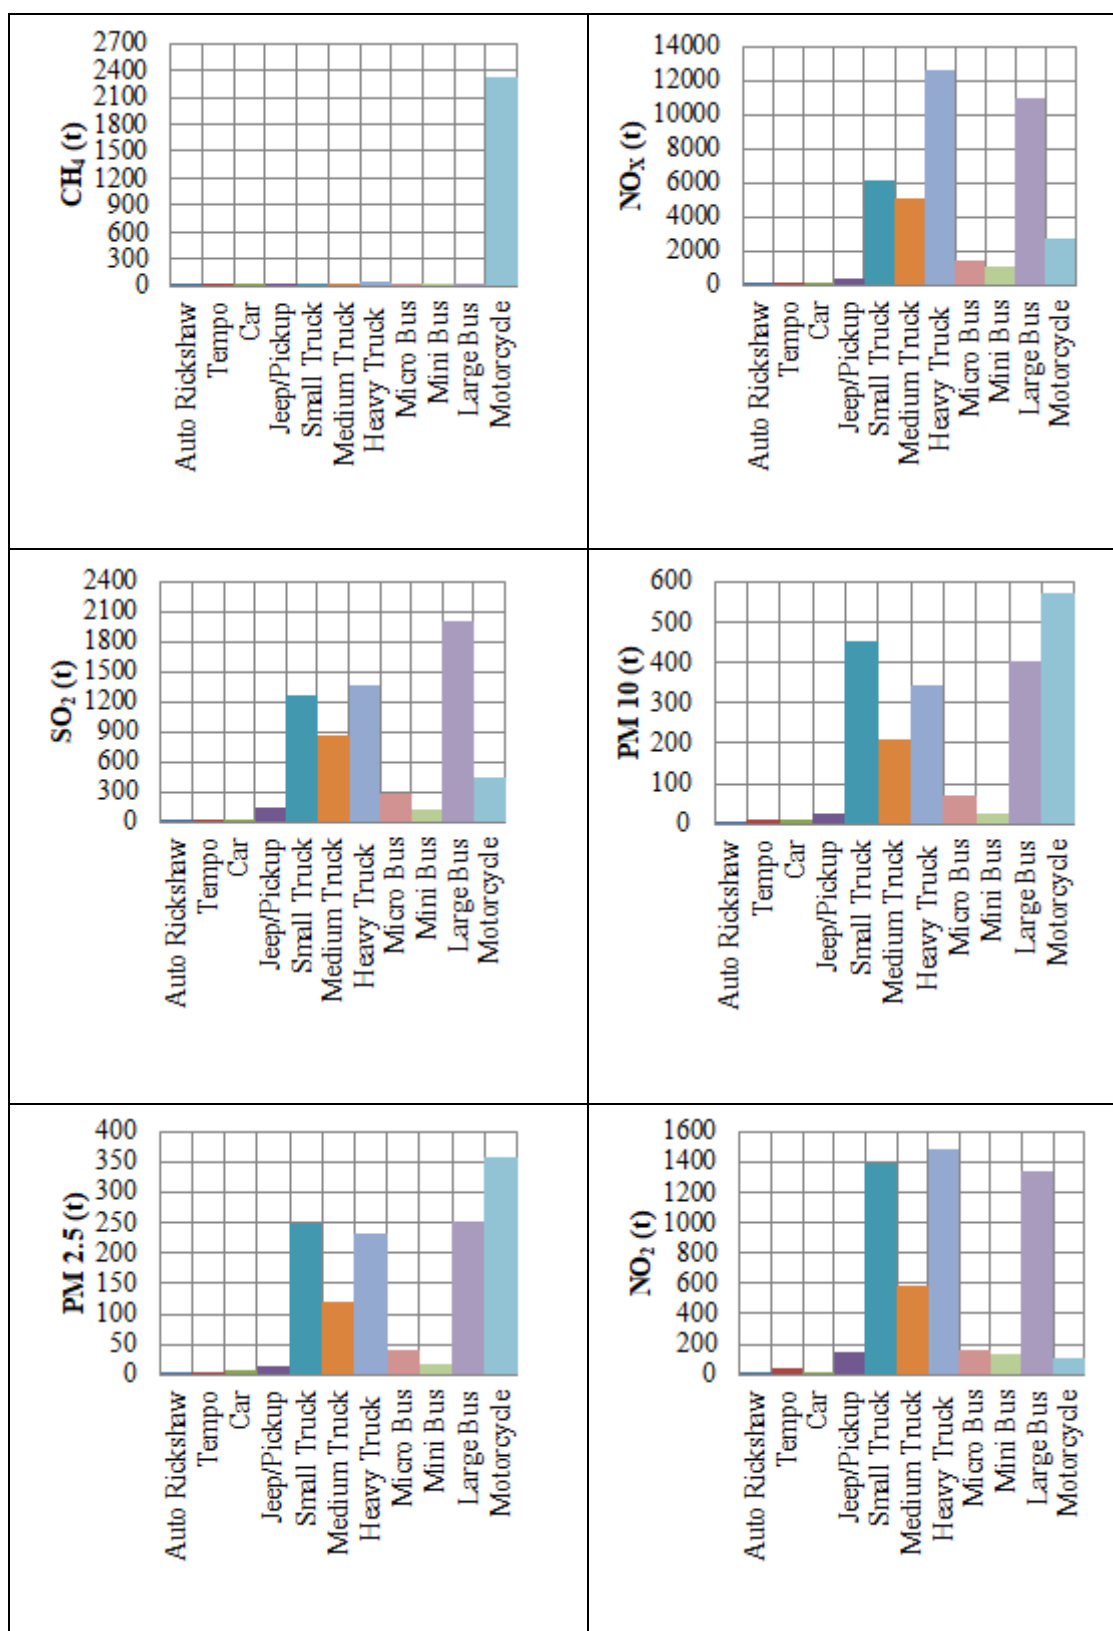

Figure 5.1: Emission of pollutants by different types of vehicles in the year 2016 (continued)

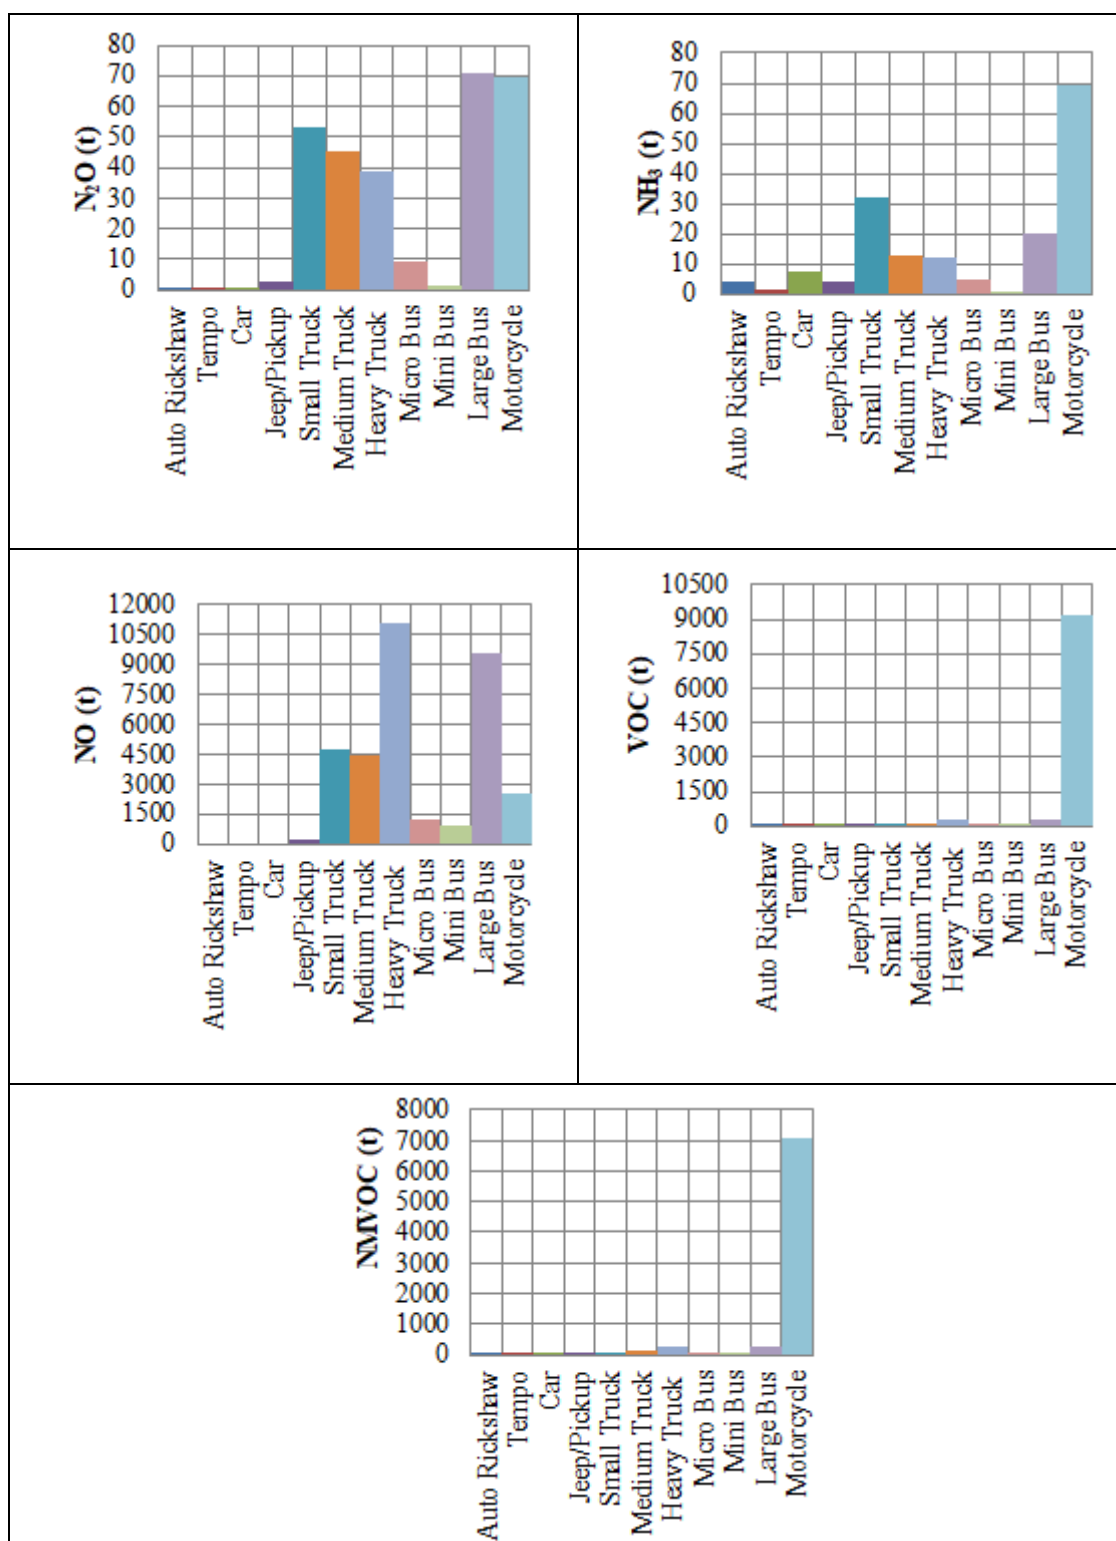

Figure 5.1: Emission of pollutants by different types of vehicles in the year 2016 (continued)

### 5.3.2 Emission Inventory for the Year 2017

The emission inventory for the year 2017 calculated by COPERT is shown in Table 5.4.

Table 5.4: Emission inventory for the year 2017

| <b>Vehicle Category</b> | <b>CO<sub>2</sub> (t)</b> | <b>CO (t)</b>     | <b>CH<sub>4</sub> (t)</b> | <b>NO<sub>x</sub> (t)</b> | <b>SO<sub>2</sub> (t)</b> |
|-------------------------|---------------------------|-------------------|---------------------------|---------------------------|---------------------------|
| Auto Rickshaw           | 43932.379                 | 63.275            | 4.510                     | 14.291                    | 7.760                     |
| Tempo                   | 62758.114                 | 43.427            | 1.758                     | 157.438                   | 31.669                    |
| Car                     | 81528.486                 | 132.296           | 8.217                     | 29.811                    | 14.403                    |
| Jeep/Pickup             | 156394.911                | 61.155            | 2.204                     | 304.515                   | 83.254                    |
| Small Truck             | 1763346.563               | 1255.159          | 10.894                    | 7352.295                  | 1140.648                  |
| Medium Truck            | 1199699.377               | 1397.716          | 22.599                    | 5594.539                  | 776.727                   |
| Heavy Truck             | 1894644.282               | 3430.786          | 48.654                    | 14534.948                 | 1226.855                  |
| Micro Bus               | 381002.697                | 431.695           | 6.178                     | 1556.179                  | 246.189                   |
| Mini Bus                | 163166.630                | 324.706           | 3.869                     | 1242.038                  | 105.455                   |
| Large Bus               | 2692372.455               | 3267.118          | 43.630                    | 11867.328                 | 1743.285                  |
| Motorcycle              | 1355522.603               | 35875.887         | 1426.621                  | 1650.348                  | 239.467                   |
| <b>Total (t)</b>        | 9794368.498               | 46283.221         | 1579.135                  | 44303.729                 | 5615.712                  |
| <b>Vehicle Category</b> | <b>PM 10 (t)</b>          | <b>PM 2.5 (t)</b> | <b>NO<sub>2</sub> (t)</b> | <b>N<sub>2</sub>O (t)</b> | <b>NH<sub>3</sub> (t)</b> |
| Auto Rickshaw           | 6.815                     | 3.776             | 0.369                     | 0.524                     | 3.897                     |
| Tempo                   | 10.623                    | 6.483             | 54.259                    | 1.084                     | 2.261                     |
| Car                     | 11.819                    | 6.511             | 0.799                     | 1.168                     | 7.924                     |
| Jeep/Pickup             | 19.009                    | 11.354            | 109.130                   | 2.027                     | 3.125                     |
| Small Truck             | 497.928                   | 273.484           | 1604.204                  | 58.109                    | 36.138                    |
| Medium Truck            | 230.248                   | 133.211           | 640.907                   | 50.933                    | 14.548                    |
| Heavy Truck             | 380.249                   | 255.465           | 1702.719                  | 45.126                    | 14.509                    |
| Micro Bus               | 79.144                    | 44.239            | 184.068                   | 9.744                     | 5.112                     |
| Mini Bus                | 29.915                    | 20.313            | 147.203                   | 1.852                     | 1.169                     |
| Large Bus               | 450.911                   | 286.895           | 1453.634                  | 77.584                    | 22.057                    |
| Motorcycle              | 343.791                   | 213.793           | 66.014                    | 42.094                    | 42.094                    |
| <b>Total (t)</b>        | 2060.452                  | 1255.524          | 5963.306                  | 290.245                   | 152.833                   |

Table 5.4: Emission inventory for the year 2017 (continued)

| Vehicle Category | NO (t)           | VOC (t)         | NMVOC (t)       |
|------------------|------------------|-----------------|-----------------|
| Auto Rickshaw    | 13.921           | 24.257          | 20.234          |
| Tempo            | 103.179          | 9.447           | 7.752           |
| Car              | 29.012           | 28.914          | 20.697          |
| Jeep/Pickup      | 195.385          | 11.240          | 9.245           |
| Small Truck      | 5748.091         | 117.815         | 106.921         |
| Medium Truck     | 4953.632         | 144.165         | 121.566         |
| Heavy Truck      | 12832.229        | 352.889         | 304.235         |
| Micro Bus        | 1372.110         | 33.072          | 26.894          |
| Mini Bus         | 1094.834         | 29.799          | 25.930          |
| Large Bus        | 10413.694        | 400.977         | 357.347         |
| Motorcycle       | 1584.334         | 6613.629        | 5276.896        |
| <b>Total (t)</b> | <b>38340.423</b> | <b>7766.205</b> | <b>6277.716</b> |

The quantity of emissions in the year 2017 is represented via bar diagrams in Figure 5.2.

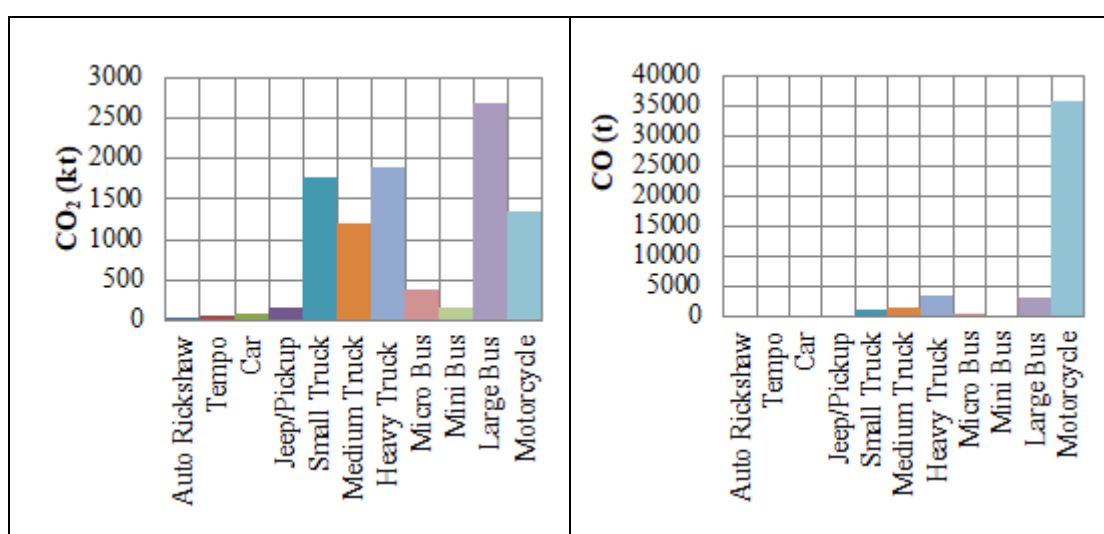

Figure 5.2: Emission of pollutants by different types of vehicles in the year 2017

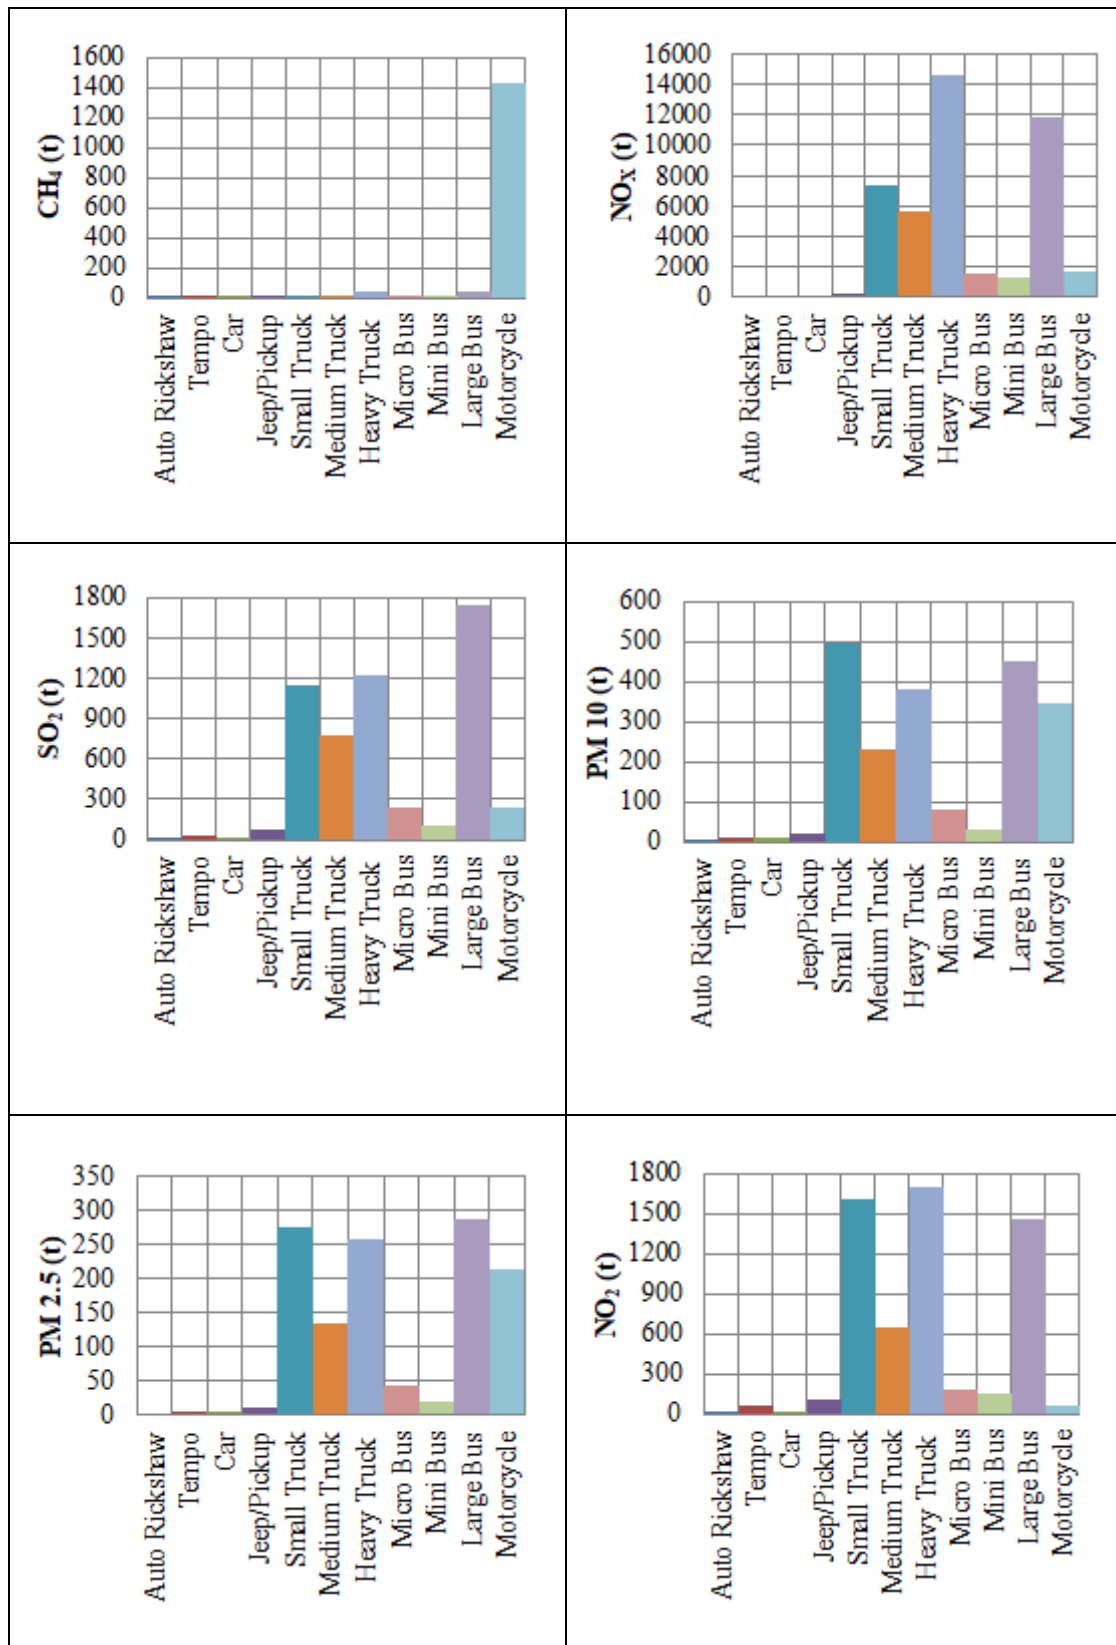

Figure 5.2 Emission of pollutants by different types of vehicles in the year 2017  
(continued)

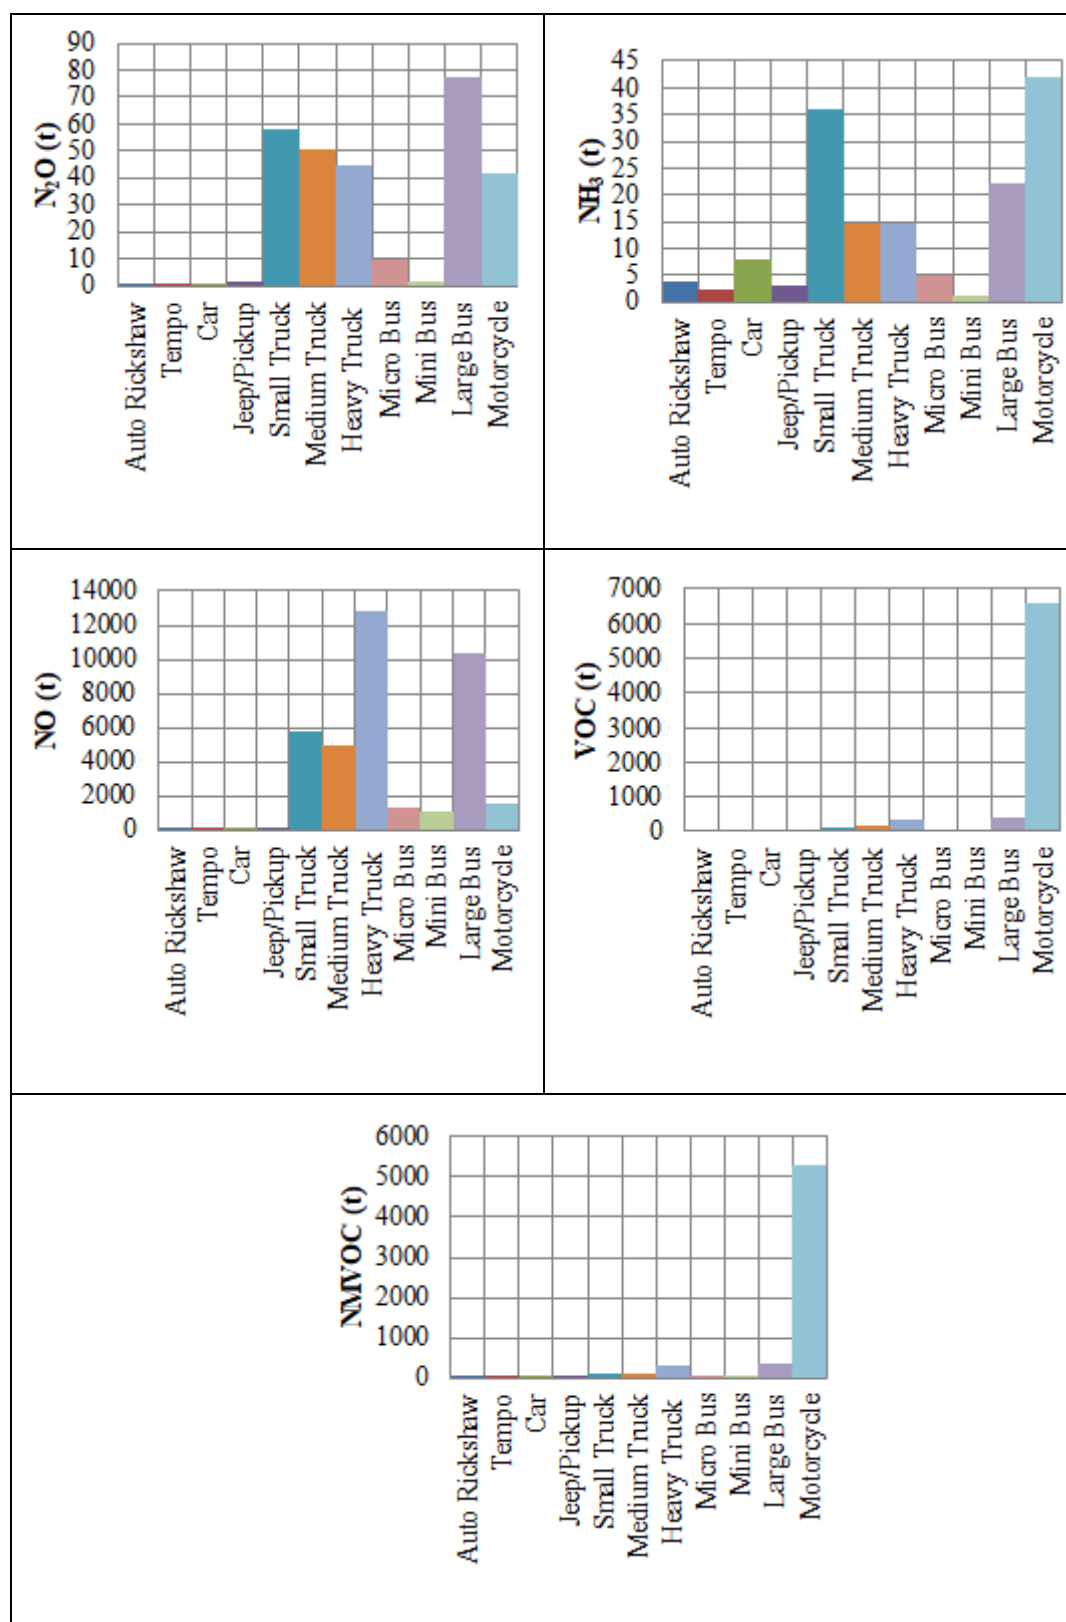

Figure 5.2 Emission of pollutants by different types of vehicles in the year 2017  
(continued)

### 5.3.3 Emission Inventory for the Year 2018

The emission inventory for the year 2018 calculated by COPERT is shown in Table 5.5.

Table 5.5: Emission inventory for the year 2018

| <b>Vehicle Category</b> | <b>CO<sub>2</sub> (t)</b> | <b>CO (t)</b>     | <b>CH<sub>4</sub> (t)</b> | <b>NO<sub>x</sub> (t)</b> | <b>SO<sub>2</sub> (t)</b> |
|-------------------------|---------------------------|-------------------|---------------------------|---------------------------|---------------------------|
| Auto Rickshaw           | 47187.874                 | 73.052            | 4.721                     | 14.887                    | 6.324                     |
| Tempo                   | 71368.993                 | 52.758            | 2.109                     | 175.328                   | 25.927                    |
| Car                     | 85295.974                 | 143.292           | 8.588                     | 31.439                    | 11.431                    |
| Jeep/Pickup             | 178000.616                | 71.321            | 2.550                     | 343.760                   | 68.863                    |
| Small Truck             | 2014120.041               | 1385.422          | 11.508                    | 8338.419                  | 947.553                   |
| Medium Truck            | 1372493.361               | 1534.660          | 23.569                    | 6135.377                  | 646.260                   |
| Heavy Truck             | 2180773.061               | 3951.787          | 49.778                    | 16681.723                 | 1027.014                  |
| Micro Bus               | 411150.466                | 450.075           | 6.153                     | 1650.651                  | 193.169                   |
| Mini Bus                | 187834.871                | 382.292           | 4.215                     | 1434.853                  | 88.283                    |
| Large Bus               | 2889704.119               | 3453.912          | 48.471                    | 12448.979                 | 1360.773                  |
| Motorcycle              | 1619495.875               | 42017.573         | 1710.205                  | 1933.778                  | 217.042                   |
| <b>Total (t)</b>        | <b>11057425.252</b>       | <b>53516.145</b>  | <b>1871.868</b>           | <b>49189.194</b>          | <b>4592.637</b>           |
| <b>Vehicle Category</b> | <b>PM 10 (t)</b>          | <b>PM 2.5 (t)</b> | <b>NO<sub>2</sub> (t)</b> | <b>N<sub>2</sub>O (t)</b> | <b>NH<sub>3</sub> (t)</b> |
| Auto Rickshaw           | 7.130                     | 3.955             | 0.387                     | 0.530                     | 3.993                     |
| Tempo                   | 12.066                    | 7.366             | 59.432                    | 1.224                     | 2.671                     |
| Car                     | 12.254                    | 6.739             | 0.838                     | 1.229                     | 8.265                     |
| Jeep/Pickup             | 21.703                    | 13.019            | 123.727                   | 2.297                     | 3.610                     |
| Small Truck             | 555.514                   | 303.506           | 1820.340                  | 65.650                    | 40.863                    |
| Medium Truck            | 255.560                   | 145.932           | 694.835                   | 59.039                    | 16.753                    |
| Heavy Truck             | 420.436                   | 278.672           | 1937.463                  | 53.278                    | 17.113                    |
| Micro Bus               | 84.156                    | 47.048            | 197.302                   | 10.303                    | 5.315                     |
| Mini Bus                | 33.439                    | 22.449            | 167.273                   | 2.233                     | 1.419                     |
| Large Bus               | 484.201                   | 310.281           | 1528.791                  | 82.865                    | 23.479                    |
| Motorcycle              | 404.654                   | 249.113           | 77.351                    | 50.365                    | 50.365                    |
| <b>Total (t)</b>        | <b>2291.114</b>           | <b>1388.081</b>   | <b>6607.738</b>           | <b>329.013</b>            | <b>173.846</b>            |

Table 5.5: Emission inventory for the year 2018 (continued)

| Vehicle Category | NO (t)           | VOC (t)         | NMVOC (t)       |
|------------------|------------------|-----------------|-----------------|
| Auto Rickshaw    | 14.500           | 26.558          | 22.073          |
| Tempo            | 115.896          | 11.369          | 9.259           |
| Car              | 30.601           | 31.072          | 22.484          |
| Jeep/Pickup      | 220.033          | 13.063          | 10.662          |
| Small Truck      | 6518.079         | 126.969         | 115.461         |
| Medium Truck     | 5440.542         | 155.967         | 132.398         |
| Heavy Truck      | 14744.260        | 377.577         | 327.800         |
| Micro Bus        | 1453.350         | 34.577          | 28.424          |
| Mini Bus         | 1267.580         | 33.230          | 29.015          |
| Large Bus        | 10920.188        | 446.867         | 398.396         |
| Motorcycle       | 1856.427         | 7844.530        | 6233.820        |
| <b>Total (t)</b> | <b>42581.456</b> | <b>9101.781</b> | <b>7329.793</b> |

The quantity of emissions in the year 2018 is represented via bar diagrams in Figure 5.3.

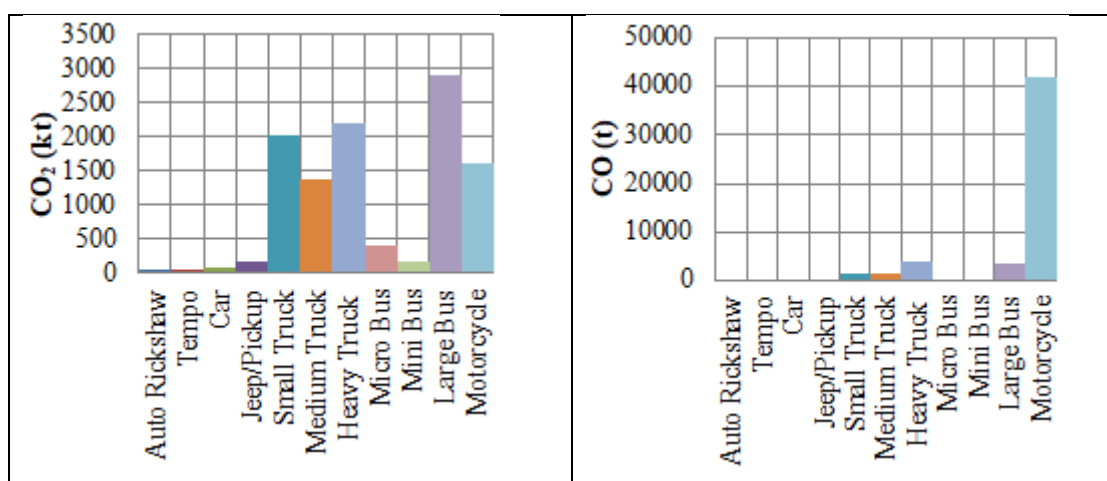

Figure 5.3: Emission of pollutants by different types of vehicles in the year 2018

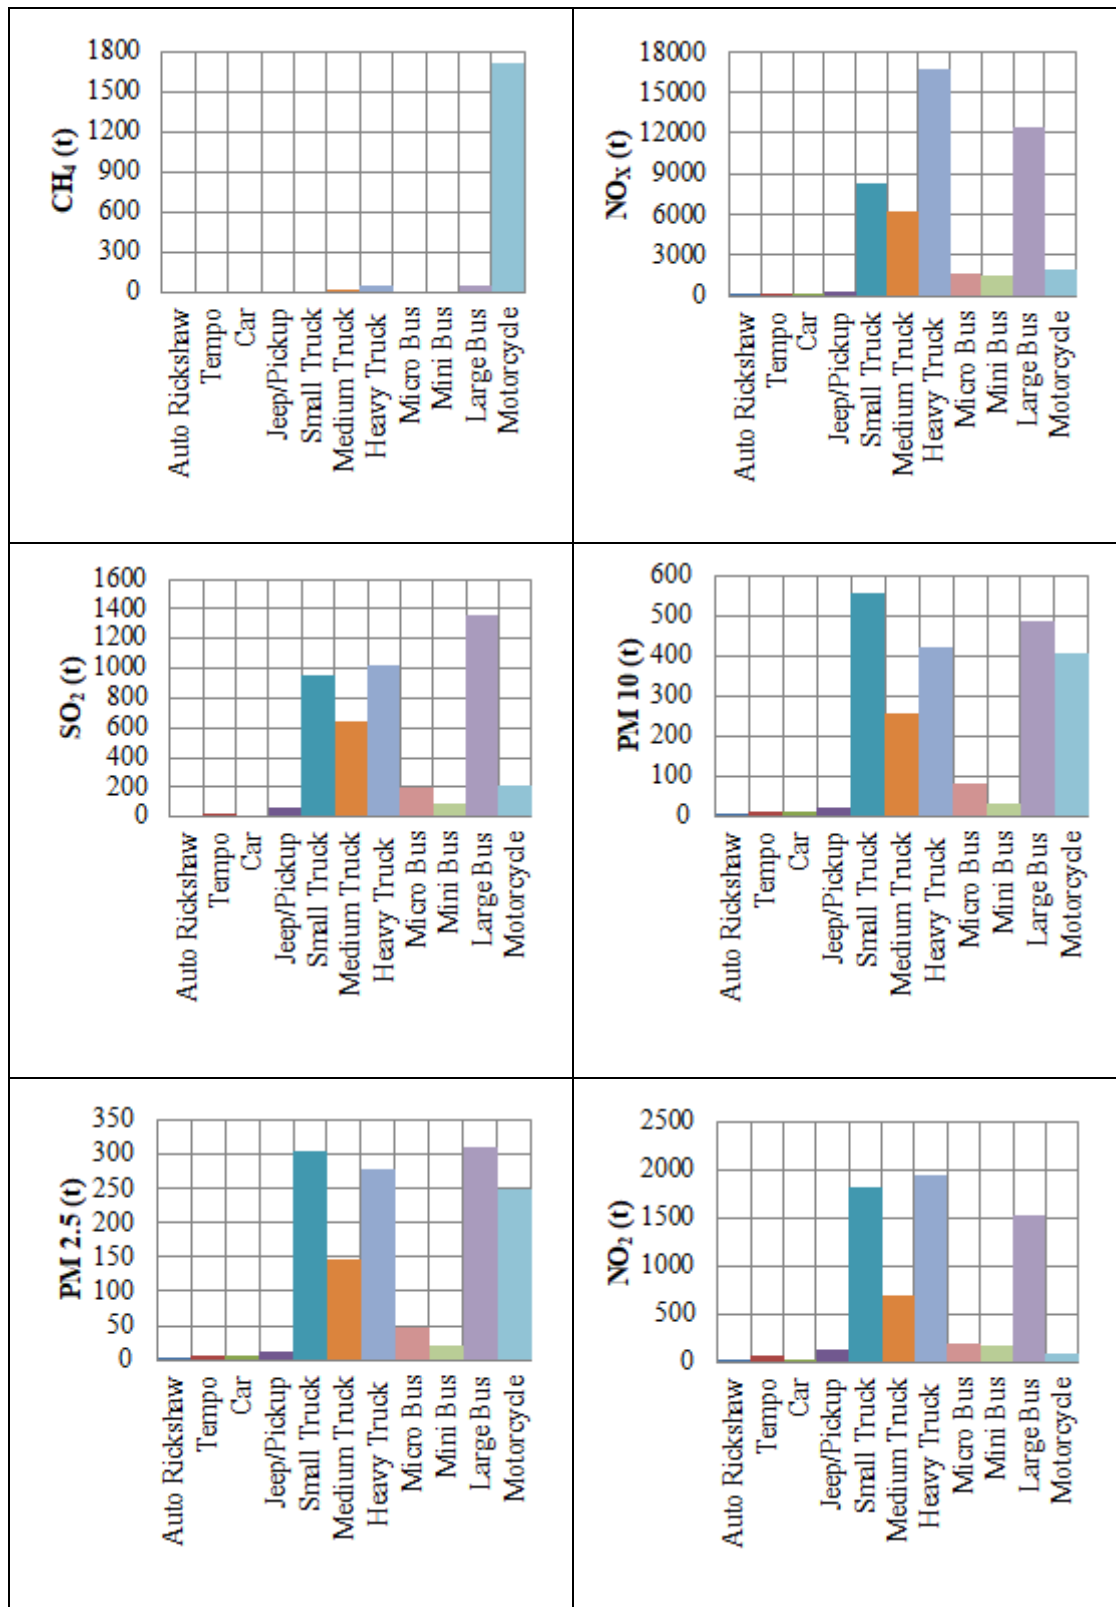

Figure 5.3: Emission of pollutants by different types of vehicles in the year 2018  
(continued)

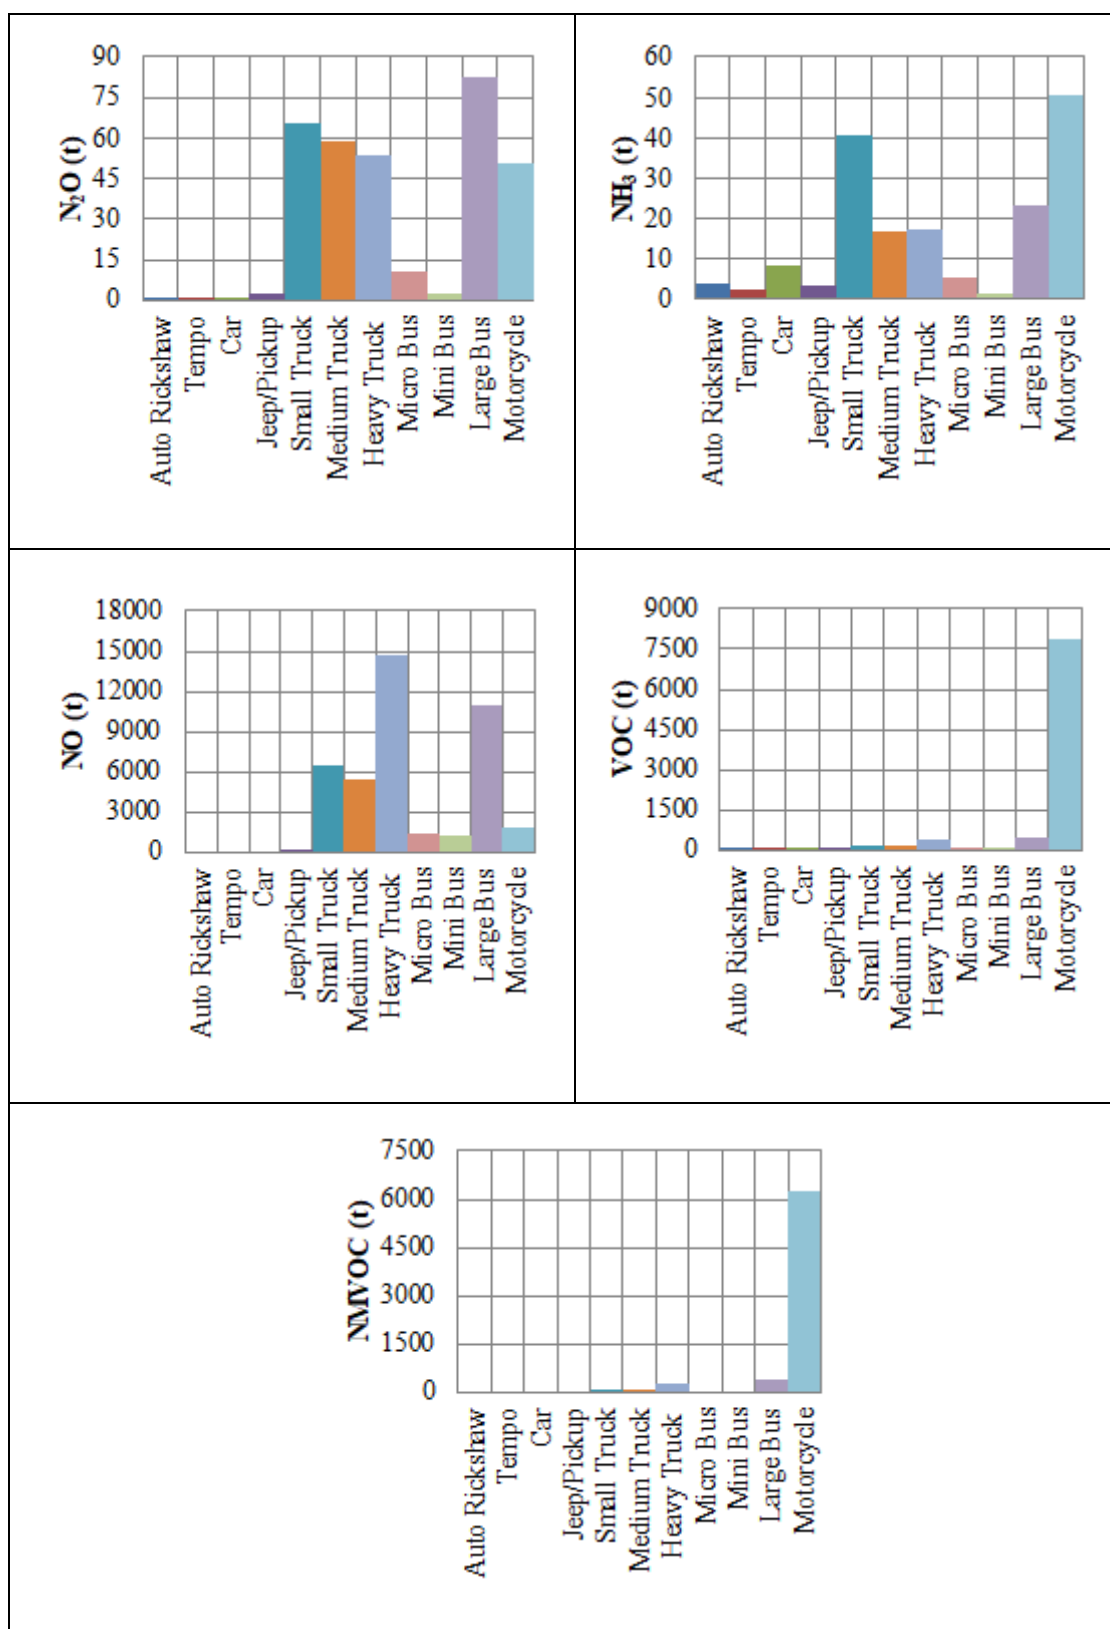

Figure 5.3: Emission of pollutants by different types of vehicles in the year 2018  
(continued)

### 5.3.4 Comparison between COPERT Results and World Bank Data

The total amount of CO<sub>2</sub> emission in Bangladesh in the year 2016 was found to be 73740 kilo tonnes (World Bank, 2018). 13.05% of this was due to on-road vehicles which is equal to 9623.07 kt. The total amount of CO<sub>2</sub> emission in 2016 calculated by COPERT 5.5 was 9578085.572 tonnes or 9578.086 kt. Thus the percentage deviation between the COPERT 5.5 result and World Bank data was found to be 0.467% for the year 2016.

The total amount of CO<sub>2</sub> emission in Bangladesh in the year 2017 was found to be 78710 kilo tonnes (World Bank, 2018). 13.05% of this was due to on-road vehicles which is equal to 10271.655 kt. The total amount of CO<sub>2</sub> emission in 2017 calculated by COPERT 5.5 was 9794368.498 tonnes or 9794.368kt. Thus the percentage deviation between the COPERT 5.5 result and World Bank data was found to be 4.647% for the year 2017.

The total amount of CO<sub>2</sub> emission in Bangladesh in the year 2018 was found to be 82760 kilo tonnes (World Bank, 2018). 13.05% of this was due to on-road vehicles which is equal to 10800.180 kt. The total amount of CO<sub>2</sub> emission in 2018 calculated by COPERT 5.5 was 11057425.252 tonnes or 11057.425 kt. Thus the percentage deviation between the COPERT 5.5 result and World Bank data was found to be 2.382% for the year 2018.

The comparison between COPERT 5.5 results and World Bank data throughout the years is represented in Figure 5.4.

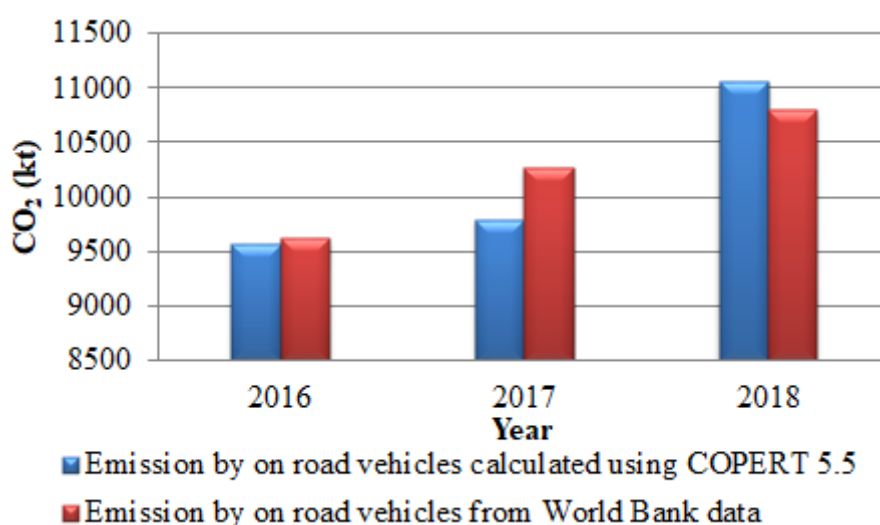

Figure 5.4: Comparison between COPERT 5.5 results and World Bank data

### 5.3.5 Emission Inventory for the Year 2019

The emission inventory for the year 2019 calculated by COPERT is shown in Table 5.6.

Table 5.6: Emission inventory for the year 2019

| <b>Vehicle Category</b> | <b>CO<sub>2</sub> (t)</b> | <b>CO (t)</b>     | <b>CH<sub>4</sub> (t)</b> | <b>NO<sub>x</sub> (t)</b> | <b>SO<sub>2</sub> (t)</b> |
|-------------------------|---------------------------|-------------------|---------------------------|---------------------------|---------------------------|
| Auto Rickshaw           | 51358.059                 | 71.463            | 5.007                     | 15.822                    | 4.693                     |
| Tempo                   | 77304.196                 | 57.473            | 2.401                     | 186.996                   | 17.518                    |
| Car                     | 88173.889                 | 142.952           | 8.821                     | 32.747                    | 8.057                     |
| Jeep/Pickup             | 198050.150                | 80.412            | 2.887                     | 383.087                   | 48.160                    |
| Small Truck             | 2162282.952               | 1566.583          | 12.811                    | 9128.517                  | 635.798                   |
| Medium Truck            | 1485811.610               | 1730.378          | 24.715                    | 6974.492                  | 437.265                   |
| Heavy Truck             | 2386596.792               | 4345.133          | 56.801                    | 18348.240                 | 702.472                   |
| Micro Bus               | 441316.422                | 491.044           | 6.792                     | 1848.820                  | 129.552                   |
| Mini Bus                | 218075.160                | 451.026           | 4.663                     | 1671.814                  | 64.053                    |
| Large Bus               | 3153859.539               | 3716.111          | 51.774                    | 13305.527                 | 928.231                   |
| Motorcycle              | 1874200.650               | 45997.512         | 1958.746                  | 2131.742                  | 171.255                   |
| <b>Total (t)</b>        | <b>12137029.420</b>       | <b>58650.085</b>  | <b>2135.419</b>           | <b>54027.801</b>          | <b>3147.054</b>           |
| <b>Vehicle Category</b> | <b>PM 10 (t)</b>          | <b>PM 2.5 (t)</b> | <b>NO<sub>2</sub> (t)</b> | <b>N<sub>2</sub>O (t)</b> | <b>NH<sub>3</sub> (t)</b> |
| Auto Rickshaw           | 7.540                     | 4.179             | 0.409                     | 0.553                     | 4.179                     |
| Tempo                   | 13.141                    | 8.057             | 62.966                    | 1.319                     | 2.986                     |
| Car                     | 12.549                    | 6.891             | 0.874                     | 1.302                     | 8.613                     |
| Jeep/Pickup             | 24.561                    | 14.921            | 138.478                   | 2.550                     | 4.030                     |
| Small Truck             | 593.227                   | 326.881           | 1982.307                  | 68.520                    | 42.213                    |
| Medium Truck            | 273.957                   | 156.976           | 790.963                   | 62.178                    | 17.730                    |
| Heavy Truck             | 466.540                   | 313.975           | 2152.931                  | 55.350                    | 17.791                    |
| Micro Bus               | 90.351                    | 51.185            | 224.681                   | 10.501                    | 5.394                     |
| Mini Bus                | 37.922                    | 25.249            | 192.758                   | 2.661                     | 1.698                     |
| Large Bus               | 520.939                   | 333.354           | 1628.929                  | 90.664                    | 25.606                    |
| Motorcycle              | 465.564                   | 284.626           | 85.270                    | 58.589                    | 58.589                    |
| <b>Total (t)</b>        | <b>2506.291</b>           | <b>1526.293</b>   | <b>7260.564</b>           | <b>354.185</b>            | <b>188.829</b>            |

Table 5.6: Emission inventory for the year 2019 (continued)

| Vehicle Category | NO (t)           | VOC (t)          | NMVOC (t)       |
|------------------|------------------|------------------|-----------------|
| Auto Rickshaw    | 15.413           | 29.412           | 24.832          |
| Tempo            | 124.030          | 12.941           | 10.561          |
| Car              | 31.872           | 32.392           | 23.571          |
| Jeep/Pickup      | 244.609          | 15.216           | 12.516          |
| Small Truck      | 7146.210         | 144.765          | 131.954         |
| Medium Truck     | 6183.529         | 168.987          | 144.272         |
| Heavy Truck      | 16195.309        | 435.753          | 378.952         |
| Micro Bus        | 1624.139         | 38.863           | 32.071          |
| Mini Bus         | 1479.056         | 37.622           | 32.958          |
| Large Bus        | 11676.598        | 485.704          | 433.930         |
| Motorcycle       | 2046.472         | 8832.516         | 6988.706        |
| <b>Total (t)</b> | <b>46767.237</b> | <b>10234.170</b> | <b>8214.324</b> |

The quantity of emissions in the year 2019 is represented via bar diagrams is shown in Figure 5.5.

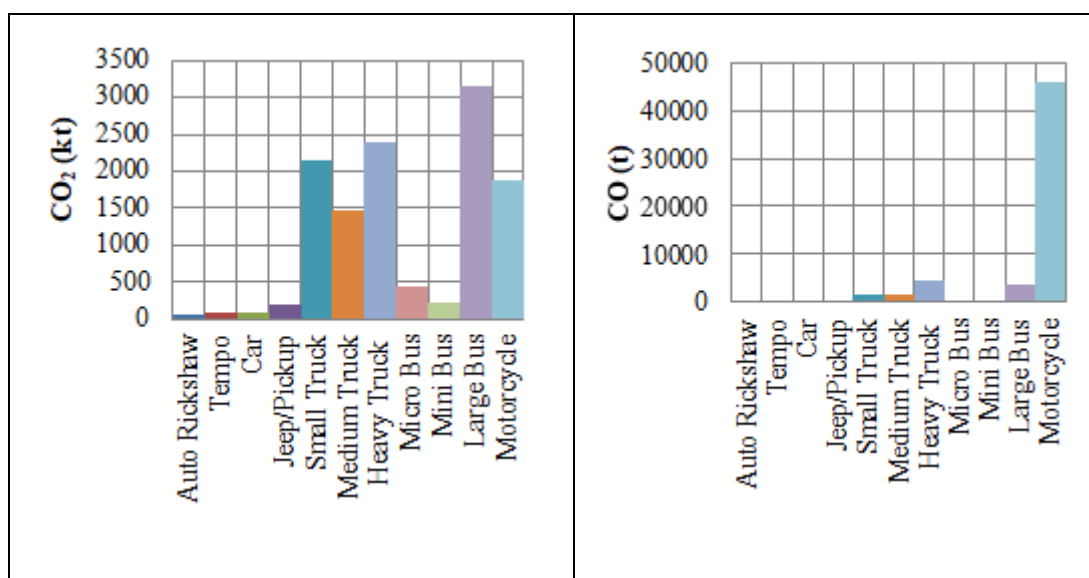

Figure 5.5: Emission of pollutants by different types of vehicles in the year 2019

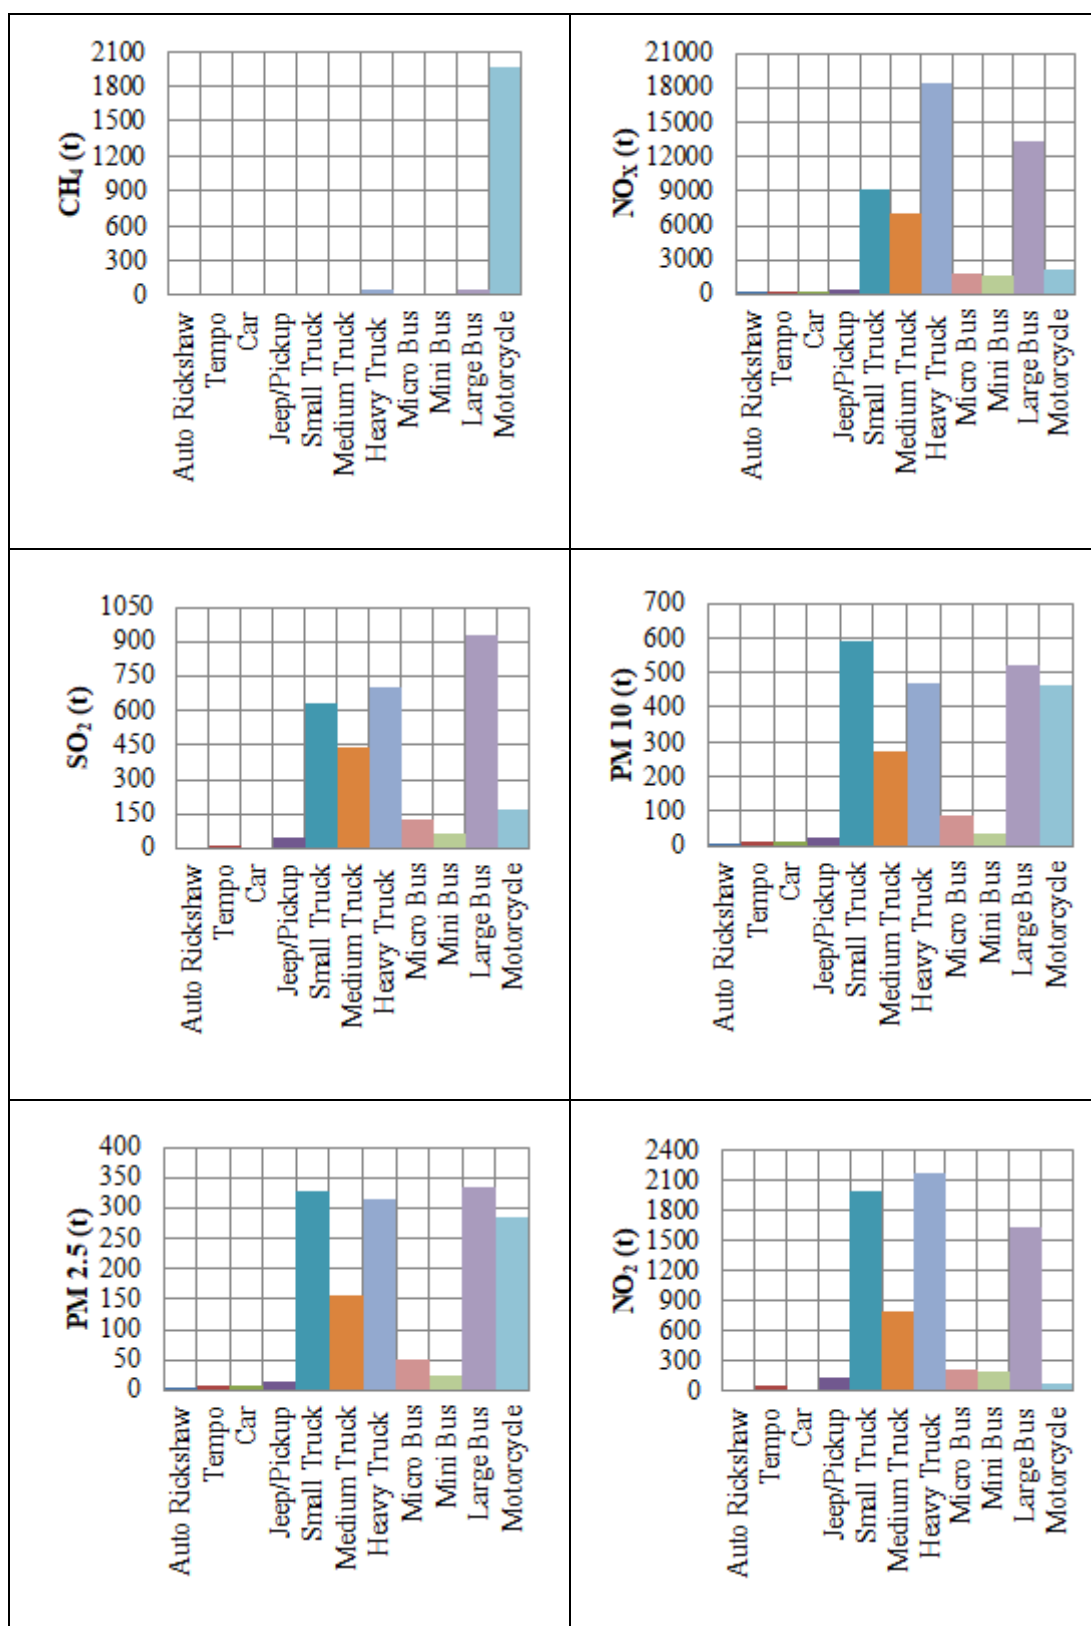

Figure 5.5: Emission of pollutants by different types of vehicles in the year 2019 (continued)

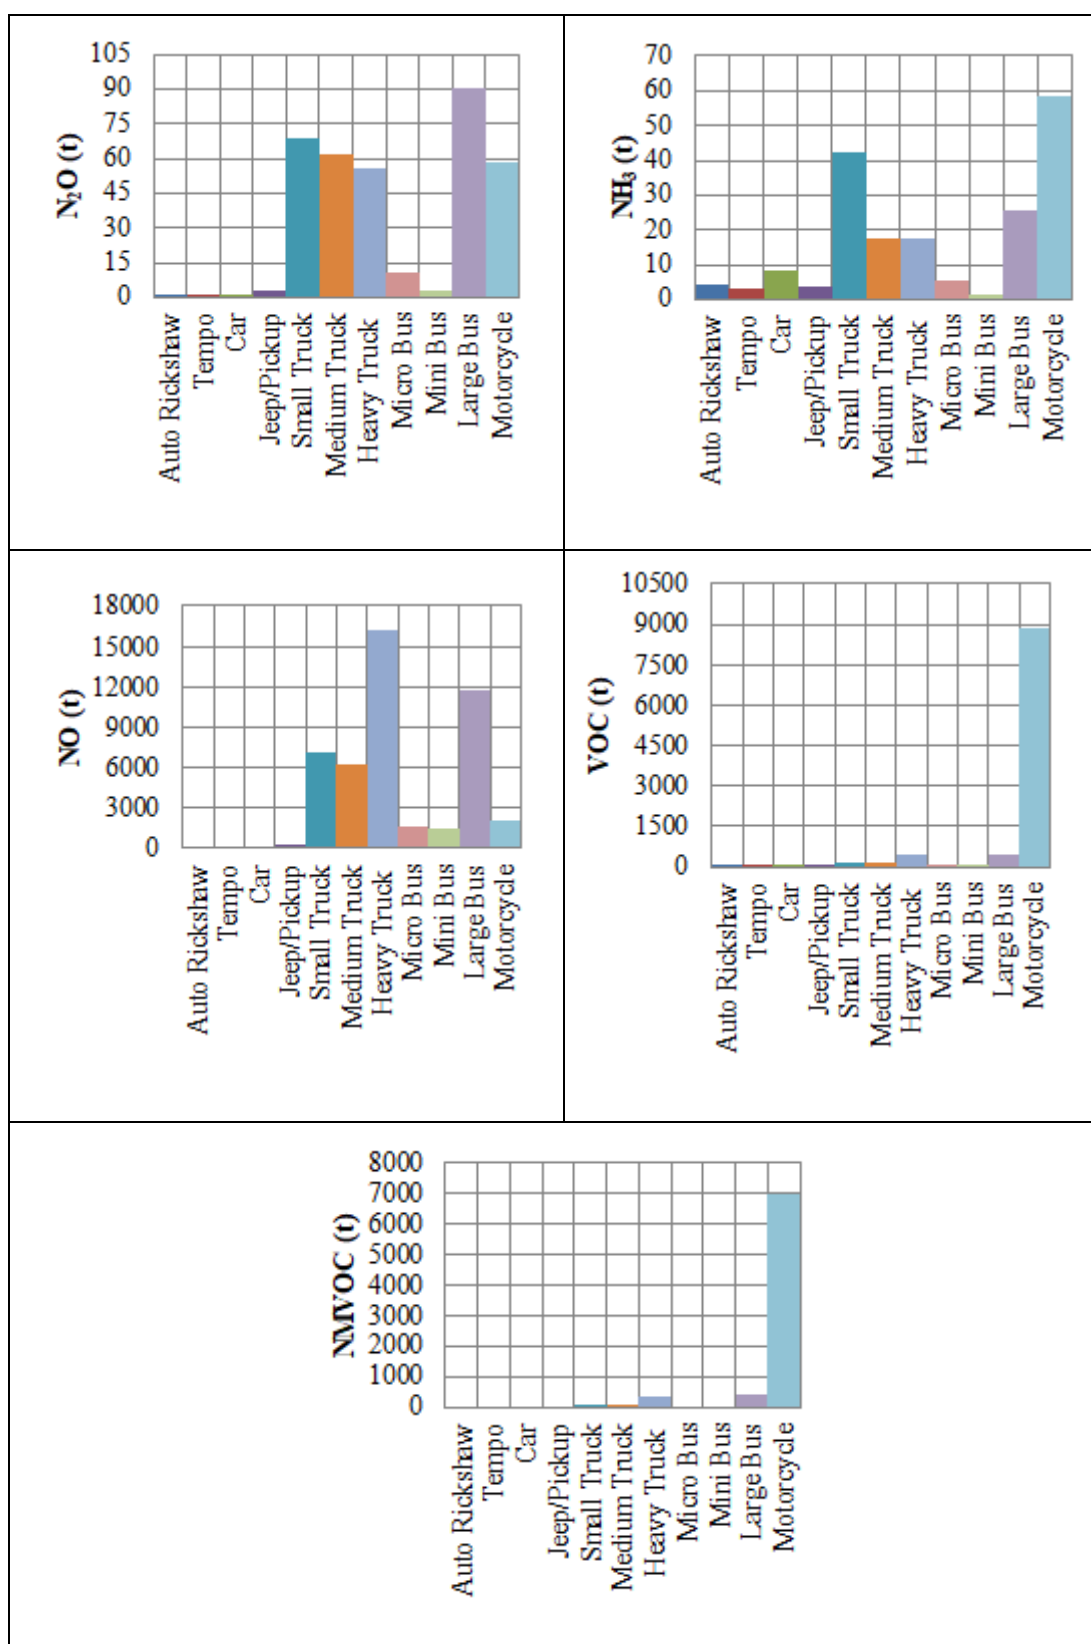

Figure 5.5: Emission of pollutants by different types of vehicles in the year 2019  
(continued)

### 5.3.6 Emission Inventory for the Year 2020

The emission inventory for the year 2020 calculated by COPERT is shown in Table 5.7.

Table 5.7: Emission inventory for the year 2020

| <b>Vehicle Category</b> | <b>CO<sub>2</sub> (t)</b> | <b>CO (t)</b>     | <b>CH<sub>4</sub> (t)</b> | <b>NO<sub>x</sub> (t)</b> | <b>SO<sub>2</sub> (t)</b> |
|-------------------------|---------------------------|-------------------|---------------------------|---------------------------|---------------------------|
| Auto Rickshaw           | 26397.002                 | 40.065            | 2.644                     | 8.411                     | 2.412                     |
| Tempo                   | 39735.991                 | 32.267            | 1.298                     | 95.971                    | 8.931                     |
| Car                     | 68018.397                 | 115.791           | 6.880                     | 25.990                    | 6.215                     |
| Jeep/Pickup             | 159008.930                | 68.535            | 2.381                     | 310.685                   | 38.659                    |
| Small Truck             | 2240623.707               | 1679.259          | 14.108                    | 9408.980                  | 658.814                   |
| Medium Truck            | 1514309.351               | 1773.481          | 25.322                    | 7204.700                  | 445.647                   |
| Heavy Truck             | 2441279.775               | 4502.683          | 67.839                    | 18816.421                 | 718.561                   |
| Micro Bus               | 340511.679                | 391.044           | 5.806                     | 1499.163                  | 99.922                    |
| Mini Bus                | 118554.941                | 244.229           | 2.794                     | 905.847                   | 34.815                    |
| Large Bus               | 1645303.727               | 1994.050          | 27.231                    | 7157.235                  | 484.231                   |
| Motorcycle              | 2051971.067               | 52331.648         | 2204.317                  | 2480.879                  | 187.491                   |
| <b>Total (t)</b>        | 10645714.566              | 63173.052         | 2360.620                  | 47914.282                 | 2685.699                  |
| <b>Vehicle Category</b> | <b>PM 10 (t)</b>          | <b>PM 2.5 (t)</b> | <b>NO<sub>2</sub> (t)</b> | <b>N<sub>2</sub>O (t)</b> | <b>NH<sub>3</sub> (t)</b> |
| Auto Rickshaw           | 3.998                     | 2.217             | 0.219                     | 0.261                     | 2.024                     |
| Tempo                   | 6.999                     | 4.333             | 32.975                    | 0.674                     | 1.467                     |
| Car                     | 9.803                     | 5.379             | 0.702                     | 1.008                     | 6.523                     |
| Jeep/Pickup             | 20.709                    | 12.817            | 113.901                   | 2.092                     | 3.233                     |
| Small Truck             | 632.361                   | 351.992           | 2084.954                  | 70.295                    | 42.594                    |
| Medium Truck            | 285.687                   | 164.365           | 831.472                   | 62.424                    | 17.762                    |
| Heavy Truck             | 503.243                   | 344.763           | 2236.332                  | 55.120                    | 17.898                    |
| Micro Bus               | 71.643                    | 41.080            | 184.288                   | 7.864                     | 4.080                     |
| Mini Bus                | 21.260                    | 14.256            | 104.902                   | 1.456                     | 0.935                     |
| Large Bus               | 273.853                   | 174.354           | 869.418                   | 48.113                    | 13.708                    |
| Motorcycle              | 526.797                   | 325.078           | 99.235                    | 65.318                    | 65.318                    |
| <b>Total (t)</b>        | 2356.354                  | 1440.633          | 6558.400                  | 314.625                   | 175.543                   |

Table 5.7: Emission inventory for the year 2020 (continued)

| Vehicle Category | NO (t)           | VOC (t)          | NMVOC (t)       |
|------------------|------------------|------------------|-----------------|
| Auto Rickshaw    | 8.192            | 17.266           | 14.674          |
| Tempo            | 62.996           | 8.906            | 7.607           |
| Car              | 25.288           | 26.480           | 19.600          |
| Jeep/Pickup      | 196.784          | 13.116           | 10.885          |
| Small Truck      | 7324.026         | 159.352          | 145.244         |
| Medium Truck     | 6373.228         | 169.711          | 144.389         |
| Heavy Truck      | 16580.089        | 491.532          | 423.693         |
| Micro Bus        | 1314.875         | 31.748           | 25.942          |
| Mini Bus         | 800.945          | 21.390           | 18.596          |
| Large Bus        | 6287.817         | 250.463          | 223.232         |
| Motorcycle       | 2381.644         | 9608.516         | 7556.044        |
| <b>Total (t)</b> | <b>41355.882</b> | <b>10798.480</b> | <b>8589.907</b> |

The quantity of emissions in the year 2020 is represented via bar diagrams as shown in Figure 5.6.

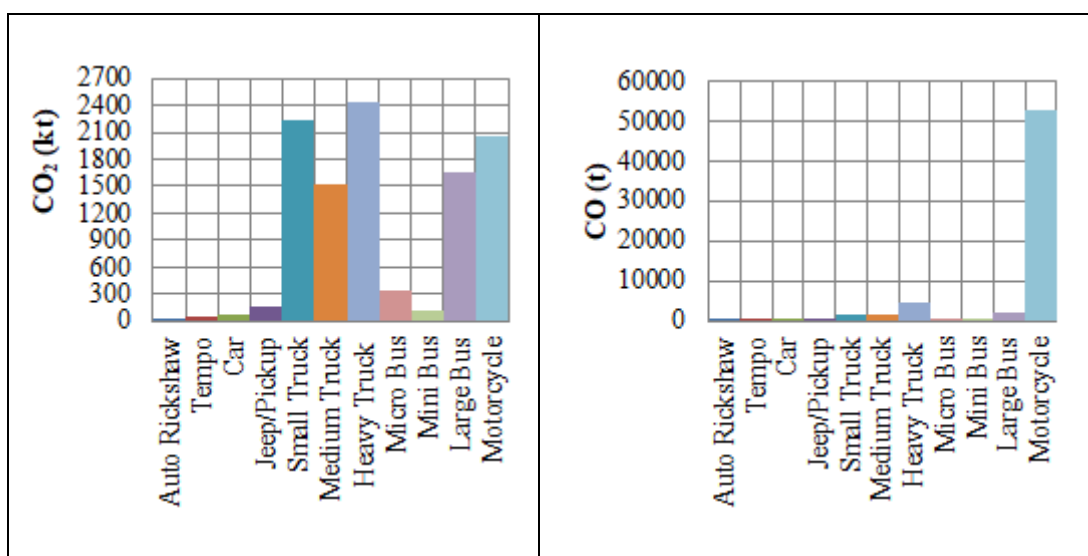

Figure 5.6: Emission of pollutants by different types of vehicles in the year 2020

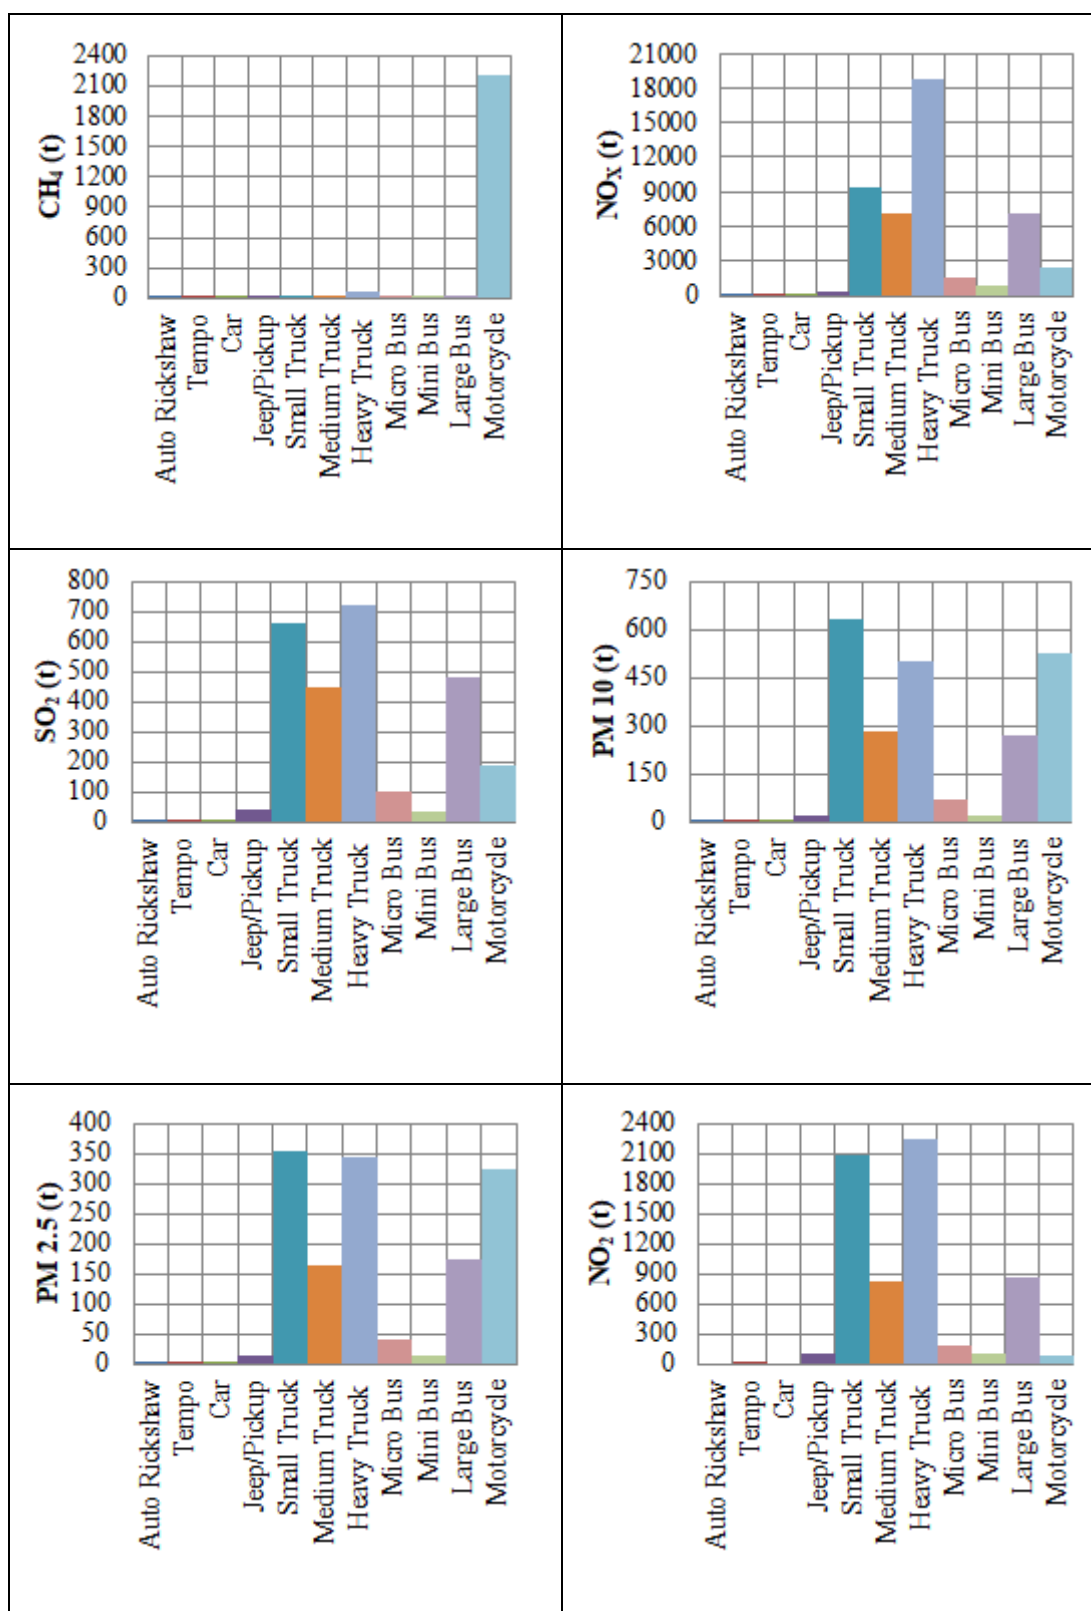

Figure 5.6: Emission of pollutants by different types of vehicles in the year 2020 (continued)

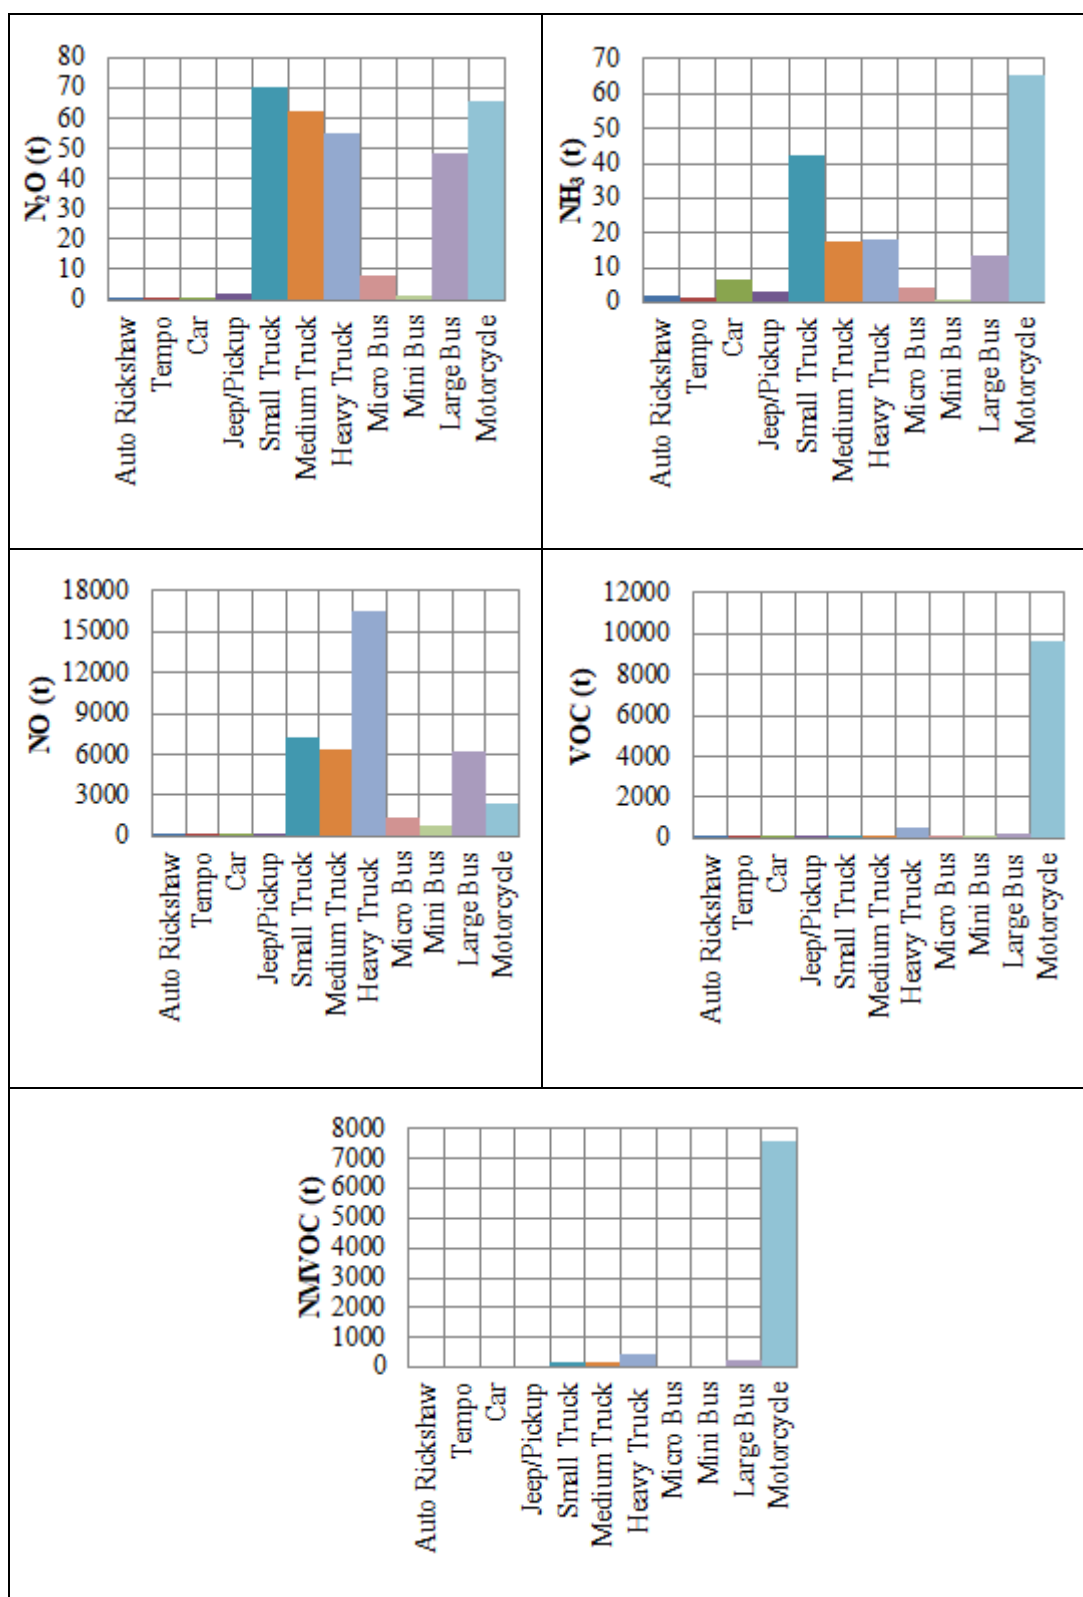

Figure 5.6: Emission of pollutants by different types of vehicles in the year 2020 (continued)

### 5.3.7 Emission Inventory for the Year 2021

The emission inventory for the year 2021 calculated by COPERT is shown in Table 5.8.

Table 5.8: Emission inventory for the year 2021

| <b>Vehicle Category</b> | <b>CO<sub>2</sub> (t)</b> | <b>CO (t)</b>     | <b>CH<sub>4</sub> (t)</b> | <b>NO<sub>x</sub> (t)</b> | <b>SO<sub>2</sub> (t)</b> |
|-------------------------|---------------------------|-------------------|---------------------------|---------------------------|---------------------------|
| Auto Rickshaw           | 29750.016                 | 39.983            | 2.774                     | 8.926                     | 2.719                     |
| Tempo                   | 43425.925                 | 34.124            | 1.436                     | 99.698                    | 9.621                     |
| Car                     | 76134.111                 | 116.546           | 7.279                     | 27.316                    | 6.957                     |
| Jeep/Pickup             | 182672.545                | 77.971            | 2.739                     | 343.304                   | 44.275                    |
| Small Truck             | 2435500.714               | 1849.087          | 16.365                    | 10099.755                 | 716.133                   |
| Medium Truck            | 1585892.680               | 1892.399          | 26.541                    | 7747.836                  | 466.713                   |
| Heavy Truck             | 2560905.705               | 4794.268          | 79.796                    | 19908.155                 | 753.773                   |
| Micro Bus               | 361982.163                | 436.339           | 6.830                     | 1678.215                  | 106.202                   |
| Mini Bus                | 126576.018                | 257.154           | 3.035                     | 965.670                   | 37.171                    |
| Large Bus               | 1668639.105               | 2188.408          | 26.280                    | 7948.944                  | 491.096                   |
| Motorcycle              | 2311599.424               | 61135.548         | 2495.941                  | 2926.584                  | 211.216                   |
| <b>Total (t)</b>        | <b>11383078.408</b>       | <b>72821.827</b>  | <b>2669.015</b>           | <b>51754.401</b>          | <b>2845.877</b>           |
| <b>Vehicle Category</b> | <b>PM 10 (t)</b>          | <b>PM 2.5 (t)</b> | <b>NO<sub>2</sub> (t)</b> | <b>N<sub>2</sub>O (t)</b> | <b>NH<sub>3</sub> (t)</b> |
| Auto Rickshaw           | 4.139                     | 2.294             | 0.236                     | 0.288                     | 2.160                     |
| Tempo                   | 7.367                     | 4.599             | 35.563                    | 1.229                     | 1.670                     |
| Car                     | 10.237                    | 5.620             | 0.744                     | 1.064                     | 6.852                     |
| Jeep/Pickup             | 23.297                    | 14.642            | 127.132                   | 4.253                     | 4.167                     |
| Small Truck             | 683.670                   | 385.693           | 2292.406                  | 86.632                    | 46.924                    |
| Medium Truck            | 302.302                   | 175.286           | 906.923                   | 63.271                    | 17.989                    |
| Heavy Truck             | 549.424                   | 383.671           | 2393.232                  | 55.032                    | 18.035                    |
| Micro Bus               | 77.240                    | 44.793            | 206.674                   | 8.136                     | 4.286                     |
| Mini Bus                | 23.030                    | 15.566            | 113.314                   | 1.494                     | 0.955                     |
| Large Bus               | 275.909                   | 174.839           | 954.083                   | 48.236                    | 13.978                    |
| Motorcycle              | 599.798                   | 373.476           | 117.063                   | 73.284                    | 73.284                    |
| <b>Total (t)</b>        | <b>2556.413</b>           | <b>1580.480</b>   | <b>7147.371</b>           | <b>342.919</b>            | <b>190.301</b>            |

Table 5.8: Emission inventory for the year 2021 (continued)

| Vehicle Category | NO (t)           | VOC (t)          | NMVOC (t)       |
|------------------|------------------|------------------|-----------------|
| Auto Rickshaw    | 8.690            | 17.378           | 14.900          |
| Tempo            | 64.134           | 9.103            | 7.704           |
| Car              | 26.572           | 26.883           | 19.605          |
| Jeep/Pickup      | 216.172          | 14.318           | 11.901          |
| Small Truck      | 7807.349         | 180.583          | 164.760         |
| Medium Truck     | 6840.912         | 178.737          | 152.196         |
| Heavy Truck      | 17514.923        | 565.929          | 486.134         |
| Micro Bus        | 1471.541         | 36.299           | 29.469          |
| Mini Bus         | 852.356          | 23.200           | 20.165          |
| Large Bus        | 6994.861         | 246.832          | 220.553         |
| Motorcycle       | 2809.520         | 10504.684        | 8186.663        |
| <b>Total (t)</b> | <b>44607.030</b> | <b>11803.947</b> | <b>9314.048</b> |

The quantity of emissions in the year 2021 is represented via bar diagrams as shown in Figure 5.7.

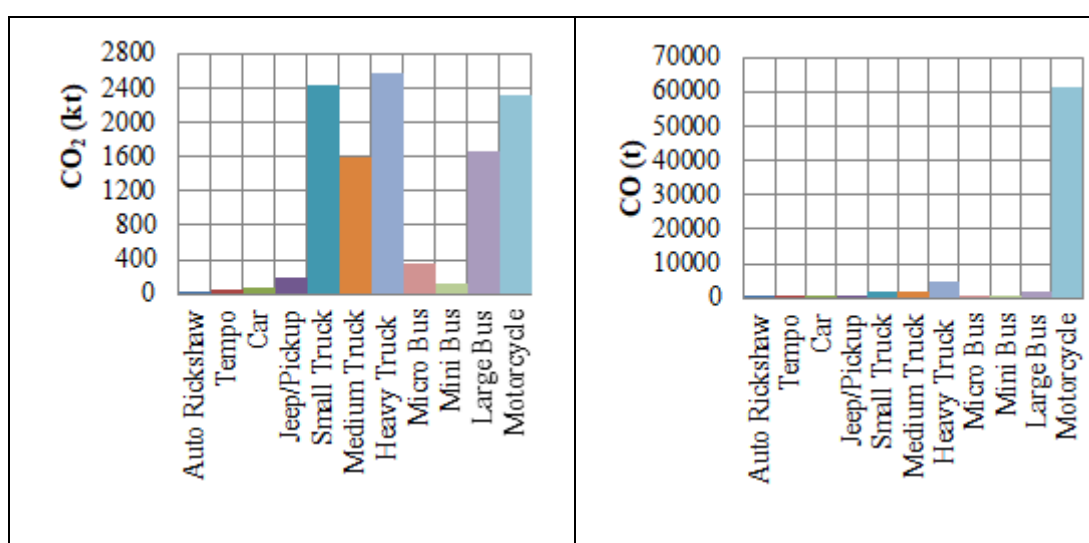

Figure 5.7: Emission of pollutants by different types of vehicles in the year 2021

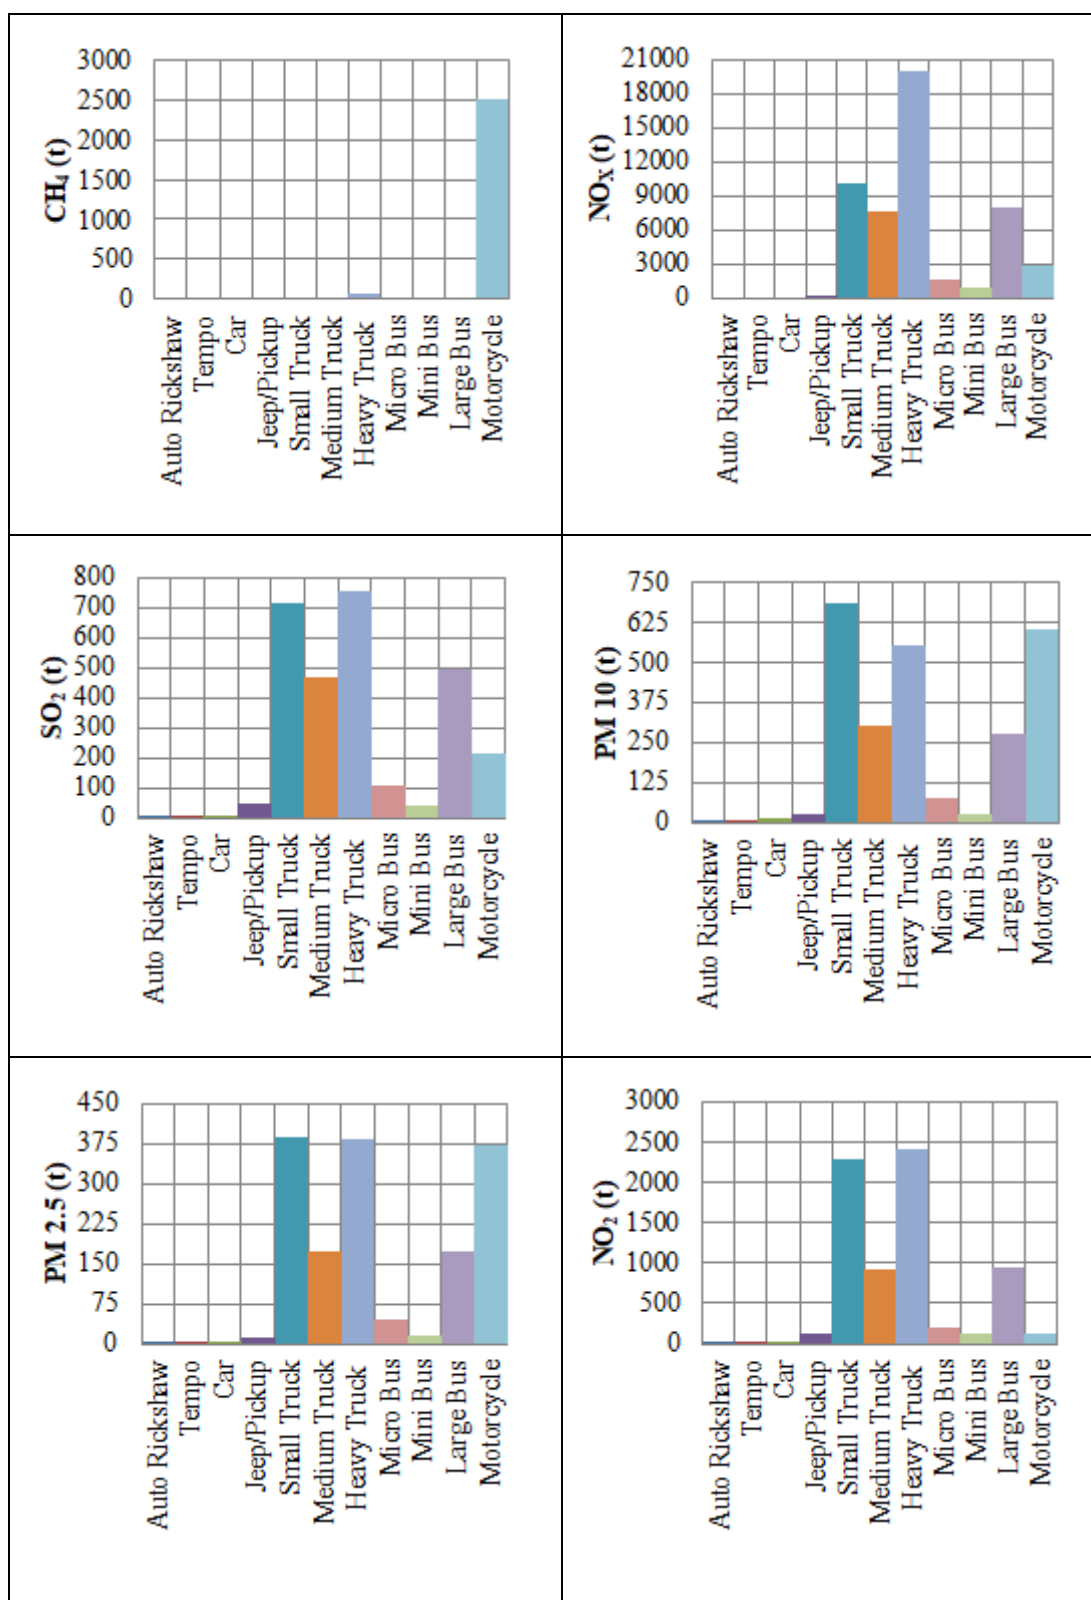

Figure 5.7: Emission of pollutants by different types of vehicles in the year 2021 (continued)

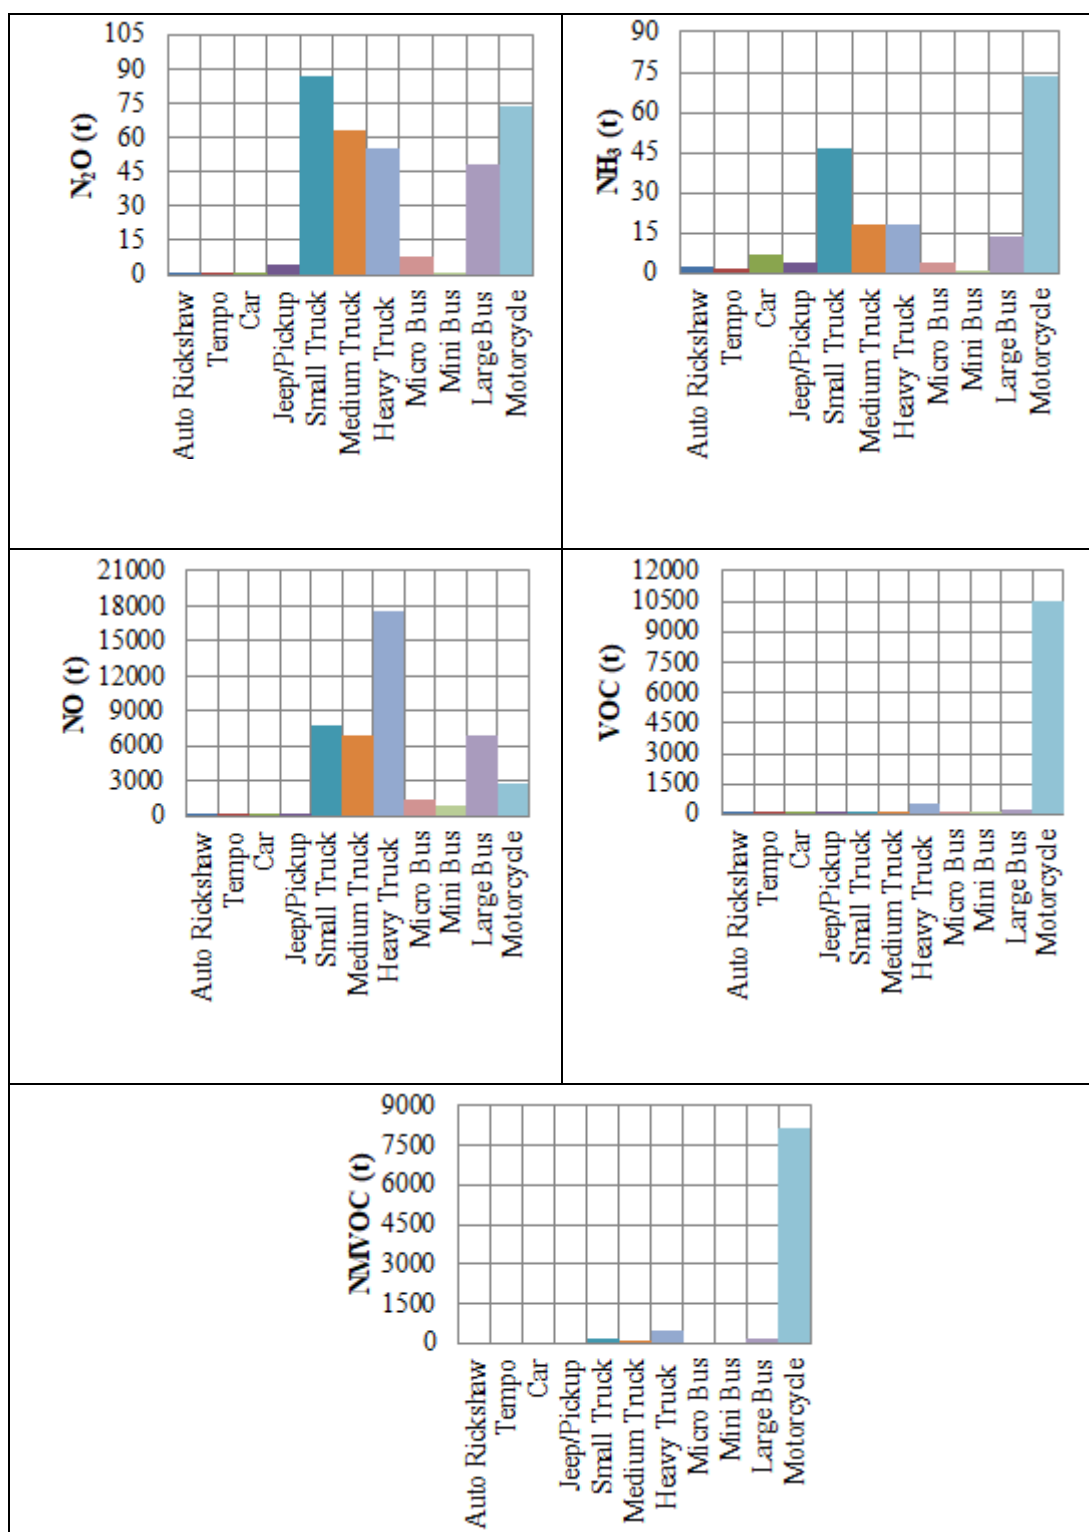

Figure 5.7: Emission of pollutants by different types of vehicles in the year 2021 (continued)

## 5.4 Analysis of the Reduction in Emission Due to Covid-19 Lockdown

The possible emission inventory in 2020 if lockdown had not occurred is shown in Table 5.9.

Table: 5.9: Emission inventory for 2020 if lockdown due to covid-19 had not occurred

| <b>Vehicle Category</b> | <b>CO<sub>2</sub> (t)</b> | <b>CO (t)</b>     | <b>CH<sub>4</sub> (t)</b> | <b>NO<sub>x</sub> (t)</b> | <b>SO<sub>2</sub> (t)</b> |
|-------------------------|---------------------------|-------------------|---------------------------|---------------------------|---------------------------|
| Auto Rickshaw           | 52365.311                 | 74.745            | 4.941                     | 15.842                    | 4.785                     |
| Tempo                   | 80574.602                 | 64.466            | 2.578                     | 193.857                   | 18.094                    |
| Car                     | 88999.870                 | 147.694           | 8.815                     | 33.444                    | 8.132                     |
| Jeep/Pickup             | 214277.352                | 91.775            | 3.141                     | 417.279                   | 52.073                    |
| Small Truck             | 2261063.664               | 1737.373          | 13.758                    | 9638.487                  | 664.860                   |
| Medium Truck            | 1534424.885               | 1822.660          | 24.832                    | 7410.333                  | 451.577                   |
| Heavy Truck             | 2499132.691               | 4658.195          | 67.090                    | 19479.716                 | 735.603                   |
| Micro Bus               | 461983.700                | 544.478           | 7.652                     | 2083.163                  | 135.582                   |
| Mini Bus                | 239344.582                | 505.030           | 5.490                     | 1864.276                  | 70.292                    |
| Large Bus               | 3297116.965               | 4061.538          | 53.054                    | 14574.857                 | 970.395                   |
| Motorcycle              | 2076252.108               | 53353.574         | 2181.417                  | 2462.375                  | 189.719                   |
| <b>Total (t)</b>        | 12805535.731              | 67061.527         | 2372.768                  | 58173.629                 | 3301.112                  |
| <b>Vehicle Category</b> | <b>PM 10 (t)</b>          | <b>PM 2.5 (t)</b> | <b>NO<sub>2</sub> (t)</b> | <b>N<sub>2</sub>O (t)</b> | <b>NH<sub>3</sub> (t)</b> |
| Auto Rickshaw           | 7.472                     | 4.143             | 0.413                     | 0.548                     | 4.121                     |
| Tempo                   | 13.930                    | 8.636             | 66.654                    | 1.382                     | 3.179                     |
| Car                     | 12.559                    | 6.891             | 0.904                     | 1.353                     | 8.785                     |
| Jeep/Pickup             | 27.385                    | 16.972            | 153.055                   | 2.777                     | 4.361                     |
| Small Truck             | 620.038                   | 346.630           | 2105.379                  | 68.549                    | 41.537                    |
| Medium Truck            | 282.230                   | 163.253           | 853.447                   | 61.217                    | 17.418                    |
| Heavy Truck             | 506.477                   | 349.748           | 2310.641                  | 54.510                    | 17.700                    |
| Micro Bus               | 94.979                    | 54.698            | 255.495                   | 10.365                    | 5.377                     |
| Mini Bus                | 42.280                    | 28.520            | 215.601                   | 2.860                     | 1.837                     |
| Large Bus               | 539.301                   | 345.445           | 1767.892                  | 93.739                    | 26.707                    |
| Motorcycle              | 521.325                   | 321.701           | 98.495                    | 64.640                    | 64.640                    |
| <b>Total (t)</b>        | 2667.975                  | 1646.636          | 7827.976                  | 361.940                   | 195.663                   |

Table: 5.9 (continued)

| <b>Vehicle Category</b> | <b>NO (t)</b>    | <b>VOC (t)</b>   | <b>NMVOC (t)</b> |
|-------------------------|------------------|------------------|------------------|
| Auto Rickshaw           | 15.429           | 30.460           | 25.686           |
| Tempo                   | 127.203          | 14.263           | 11.685           |
| Car                     | 32.540           | 33.070           | 24.255           |
| Jeep/Pickup             | 264.225          | 17.437           | 14.435           |
| Small Truck             | 7533.108         | 163.012          | 149.254          |
| Medium Truck            | 6556.887         | 175.291          | 150.459          |
| Heavy Truck             | 17169.074        | 512.765          | 445.675          |
| Micro Bus               | 1827.668         | 44.058           | 36.406           |
| Mini Bus                | 1648.675         | 44.198           | 38.708           |
| Large Bus               | 12806.965        | 509.374          | 456.320          |
| Motorcycle              | 2363.880         | 10067.751        | 8018.533         |
| <b>Total (t)</b>        | <b>50345.653</b> | <b>11611.678</b> | <b>9371.415</b>  |

The possible emission inventory in 2021 if lockdown had not occurred is shown in Table 5.10:

Table: 5.10: Emission inventory for 2021 if lockdown due to covid-19 had not occurred

| <b>Vehicle Category</b> | <b>NO (t)</b>    | <b>VOC (t)</b>   | <b>NMVOC (t)</b> |
|-------------------------|------------------|------------------|------------------|
| Auto Rickshaw           | 15.274           | 25.991           | 21.834           |
| Tempo                   | 128.578          | 13.332           | 10.644           |
| Car                     | 32.844           | 30.181           | 21.235           |
| Jeep/Pickup             | 287.629          | 17.760           | 14.552           |
| Small Truck             | 8035.725         | 184.950          | 169.913          |
| Medium Truck            | 7044.724         | 185.497          | 159.981          |
| Heavy Truck             | 18306.042        | 598.893          | 520.862          |
| Micro Bus               | 2083.835         | 51.346           | 42.449           |
| Mini Bus                | 1747.353         | 47.853           | 41.997           |
| Large Bus               | 14151.815        | 497.823          | 447.981          |
| Motorcycle              | 2762.202         | 10260.077        | 7970.691         |
| <b>Total (t)</b>        | <b>54596.021</b> | <b>11913.703</b> | <b>9422.140</b>  |

Table: 5.10 (continued)

| <b>Vehicle Category</b> | <b>CO<sub>2</sub> (t)</b> | <b>CO (t)</b>     | <b>CH<sub>4</sub> (t)</b> | <b>NO<sub>x</sub> (t)</b> | <b>SO<sub>2</sub> (t)</b> |
|-------------------------|---------------------------|-------------------|---------------------------|---------------------------|---------------------------|
| Auto Rickshaw           | 56565.578                 | 68.993            | 4.820                     | 15.688                    | 5.170                     |
| Tempo                   | 87437.507                 | 67.835            | 2.831                     | 199.955                   | 19.353                    |
| Car                     | 96329.265                 | 142.093           | 8.945                     | 33.764                    | 8.803                     |
| Jeep/Pickup             | 244010.957                | 103.604           | 3.576                     | 456.935                   | 59.115                    |
| Small Truck             | 2444511.822               | 1930.821          | 15.552                    | 10334.418                 | 718.842                   |
| Medium Truck            | 1600369.992               | 1949.853          | 25.516                    | 7975.437                  | 470.989                   |
| Heavy Truck             | 2635904.121               | 5016.001          | 78.031                    | 20799.598                 | 775.869                   |
| Micro Bus               | 493744.821                | 620.016           | 8.897                     | 2375.362                  | 144.885                   |
| Mini Bus                | 253181.148                | 530.933           | 5.856                     | 1979.179                  | 74.358                    |
| Large Bus               | 3296072.364               | 4423.240          | 49.842                    | 16077.464                 | 970.089                   |
| Motorcycle              | 2315161.696               | 61630.340         | 2444.012                  | 2877.294                  | 211.551                   |
| <b>Total (t)</b>        | 13523289.271              | 76483.728         | 2647.880                  | 63125.093                 | 3459.026                  |
| <b>Vehicle Category</b> | <b>PM 10 (t)</b>          | <b>PM 2.5 (t)</b> | <b>NO<sub>2</sub> (t)</b> | <b>N<sub>2</sub>O (t)</b> | <b>NH<sub>3</sub> (t)</b> |
| Auto Rickshaw           | 7.192                     | 3.987             | 0.414                     | 0.550                     | 4.039                     |
| Tempo                   | 14.559                    | 9.102             | 71.377                    | 2.470                     | 3.580                     |
| Car                     | 12.581                    | 6.907             | 0.920                     | 1.358                     | 8.773                     |
| Jeep/Pickup             | 30.499                    | 19.199            | 169.306                   | 5.568                     | 5.542                     |
| Small Truck             | 656.122                   | 372.944           | 2298.693                  | 82.329                    | 44.593                    |
| Medium Truck            | 293.965                   | 171.858           | 930.713                   | 60.825                    | 17.294                    |
| Heavy Truck             | 552.681                   | 390.592           | 2493.556                  | 53.815                    | 17.636                    |
| Micro Bus               | 101.648                   | 59.382            | 291.526                   | 10.598                    | 5.583                     |
| Mini Bus                | 45.182                    | 30.781            | 231.826                   | 2.883                     | 1.842                     |
| Large Bus               | 531.260                   | 339.571           | 1925.649                  | 91.485                    | 26.511                    |
| Motorcycle              | 587.319                   | 365.706           | 115.092                   | 71.760                    | 71.760                    |
| <b>Total (t)</b>        | 2833.008                  | 1770.029          | 8529.072                  | 383.642                   | 207.153                   |

The possible yearly trend of Carbon dioxide gas emission for different vehicle types if lockdown had not occurred is shown in Figure 5.8.

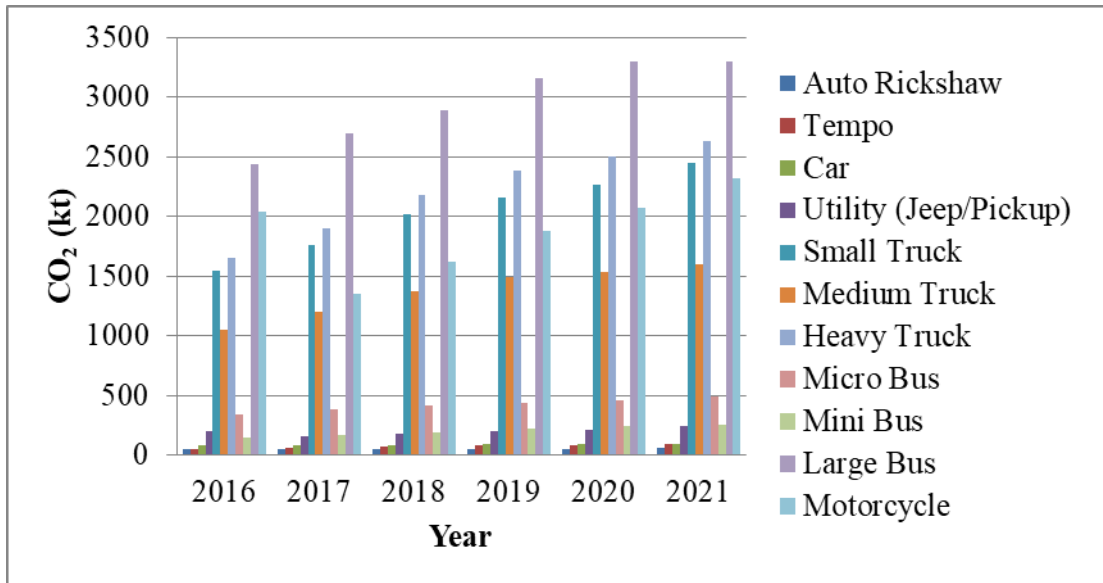

Figure 5.8: Possible yearly trend of CO<sub>2</sub> emission if lockdown had not occurred  
The reduction in the vehicular emission of CO<sub>2</sub> due to lockdown is shown in Figure 5.9.

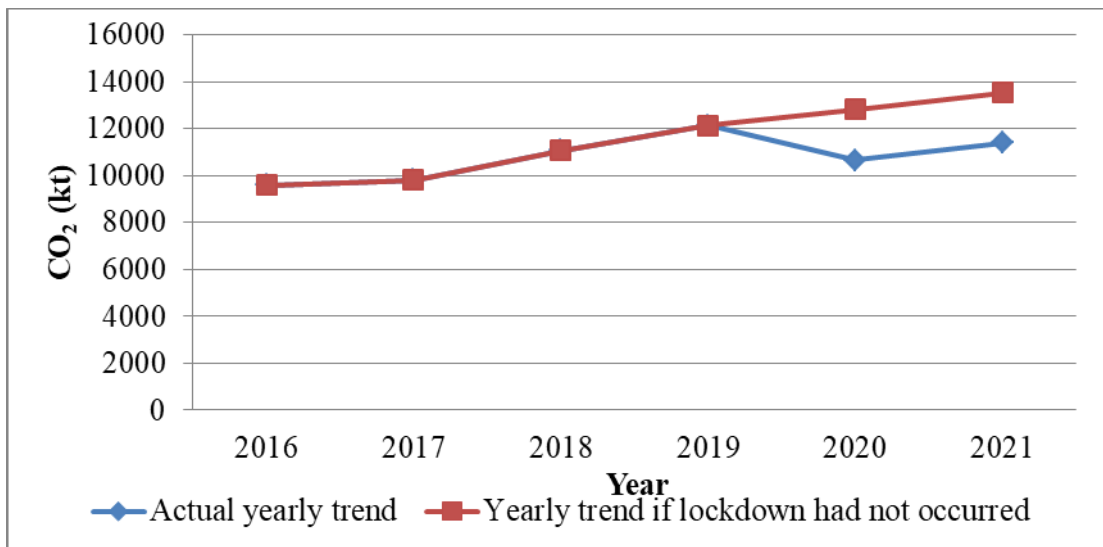

Figure 5.9: Graphical representation of decrease in total CO<sub>2</sub> emission due to lockdown

Thanks to the covid-19 lockdown, the total vehicular emission of CO<sub>2</sub> was found to be 16.866% less than the expected value in the year 2020 and it was found to be 15.826% less than the expected value in the year 2021.

The possible yearly trend of Carbon monoxide gas emission for different vehicle types if lockdown had not occurred is shown in Figure 5.10.

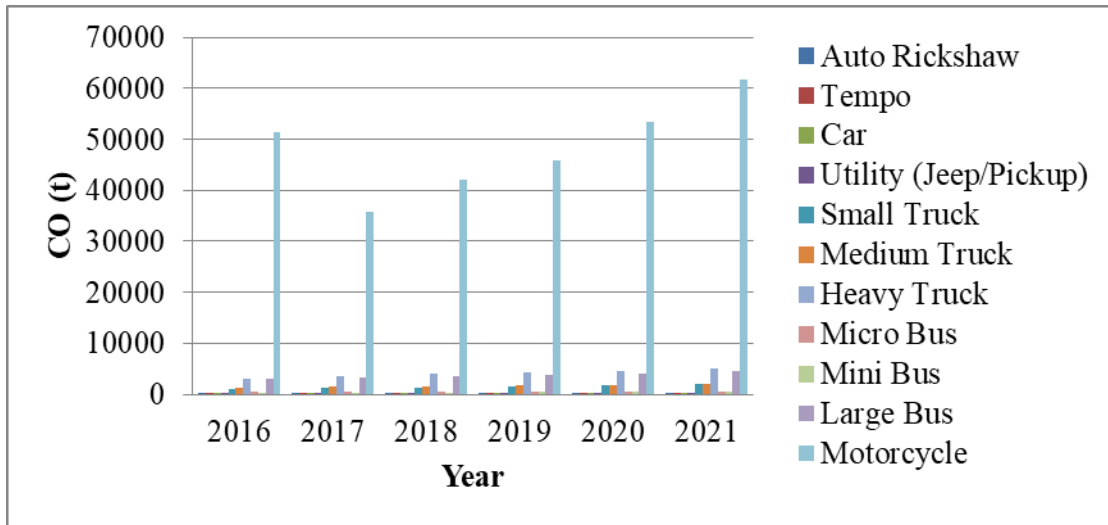

Figure 5.10: Possible yearly trend of CO emission if lockdown had not occurred  
The reduction in the vehicular emission of CO due to lockdown is shown in Figure 5.11.

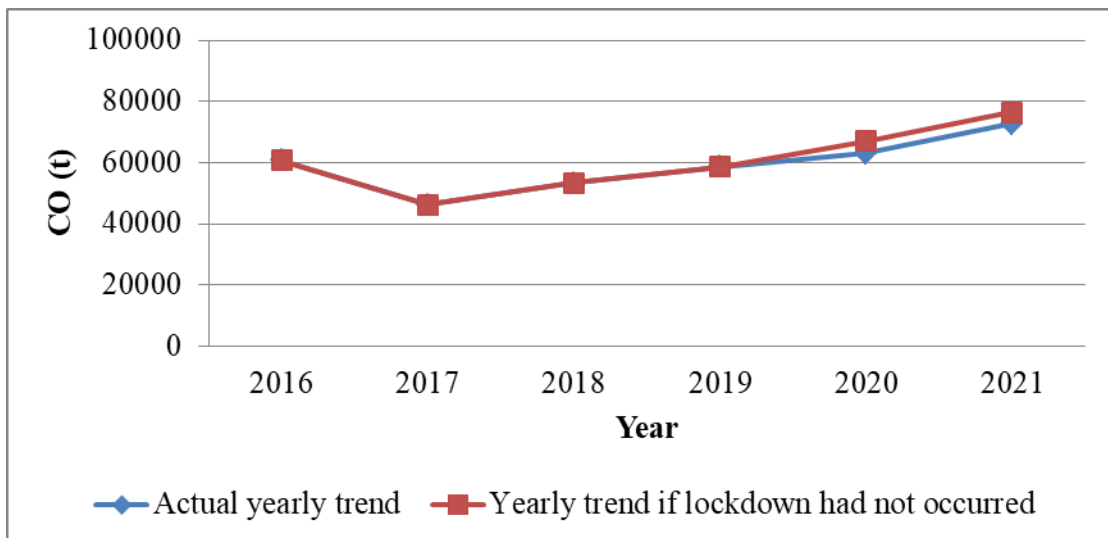

Figure: 5.11: Graphical representation of decrease in total CO emission due to lockdown

Thanks to the covid-19 lockdown, the total vehicular emissions of Carbon monoxide was found to be 5.798% less than the expected value in the year 2020 and it was found to be 4.788% less than the expected value in the year 2021.

The possible yearly  $\text{CH}_4$  emission if lockdown had not occurred is shown in Figure 5.12.

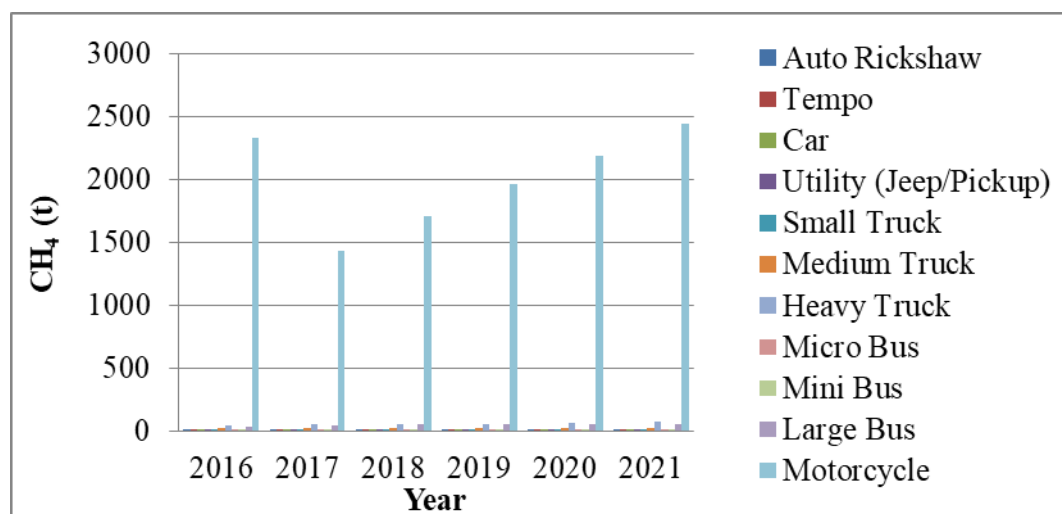

Figure 5.12: Possible yearly trend of  $\text{CH}_4$  emission if lockdown had not occurred  
The change in the vehicular emission of  $\text{CH}_4$  due to lockdown is shown in Figure 5.13.

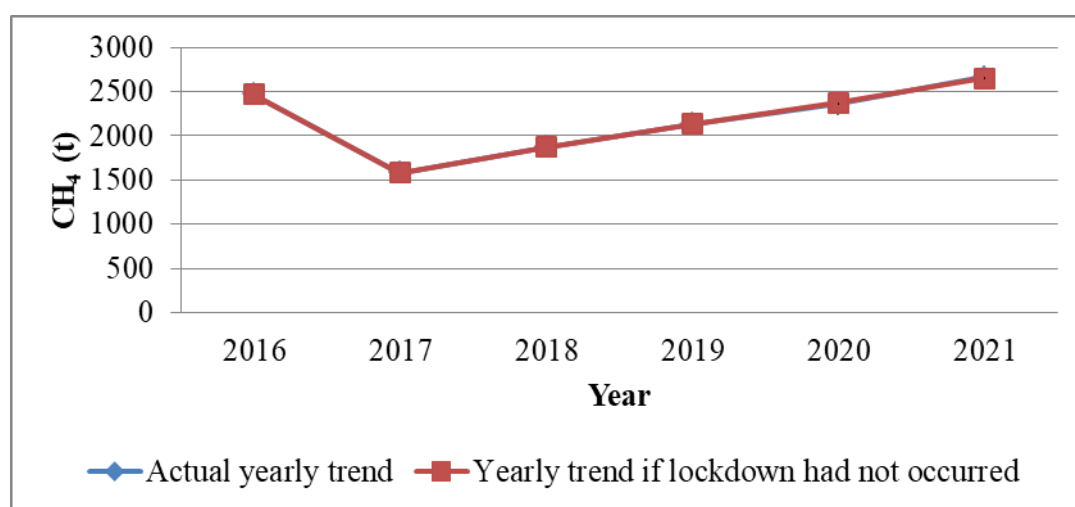

Figure 5.13: Graphical representation of change in total  $\text{CH}_4$  emission due to lockdown

The total vehicular emission of Methane was found to have a negligible decrease of 0.798% from the expected value in the year 2020 a negligible increase of 0.512% from the expected value in the year 2021. This could be because no change was assumed for the activity of medium and heavy trucks or motorcycles due to the covid-19 lockdown in Bangladesh as per practical conditions and these vehicles appear to have the greatest contribution to the emission of Methane in Figure 5.11.

The possible yearly trend of Nitrogen Oxides emission for different vehicle types if lockdown had not occurred is shown in Figure 5.14.

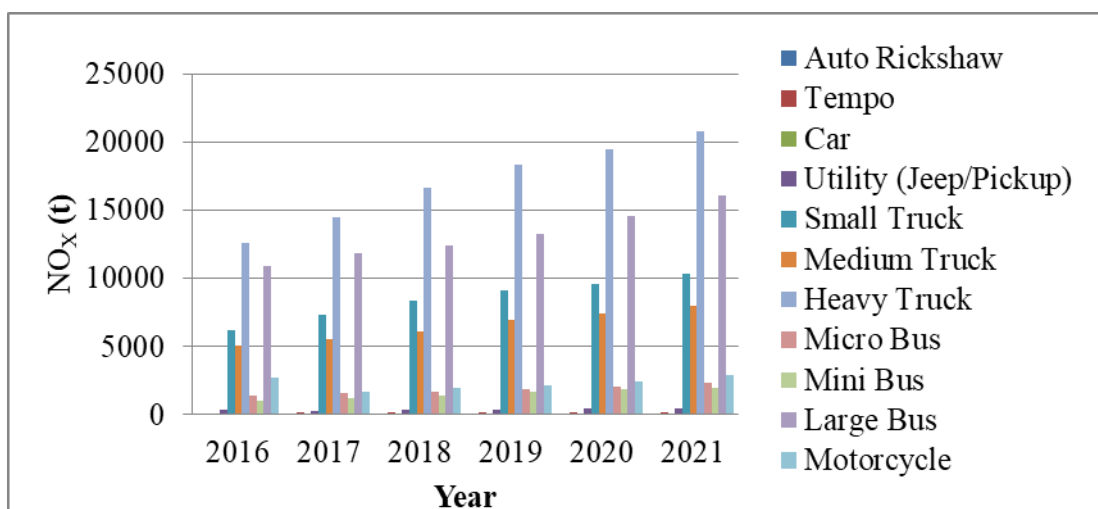

Figure 5.14: Possible yearly trend of NO<sub>x</sub> emission if lockdown had not occurred  
The reduction in the vehicular emission of NO<sub>x</sub> due to lockdown is shown in Figure 5.15.

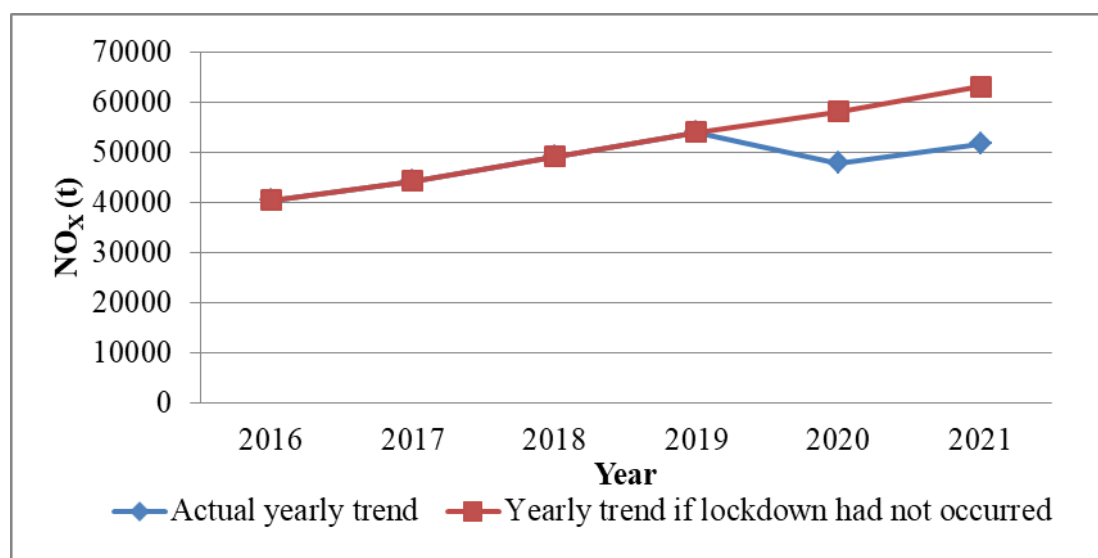

Figure 5.15: Graphical representation of decrease in total NO<sub>x</sub> emission due to lockdown

Thanks to the covid-19 lockdown, the total vehicular emissions of Nitrogen oxides was found to be 17.636% less than the expected in the year 2020 and it was found to be 18.013% less than the expected value in the year 2021.

The possible yearly trend of Sulfur dioxide emission for different vehicle types if lockdown had not occurred is shown in Figure 5.16.

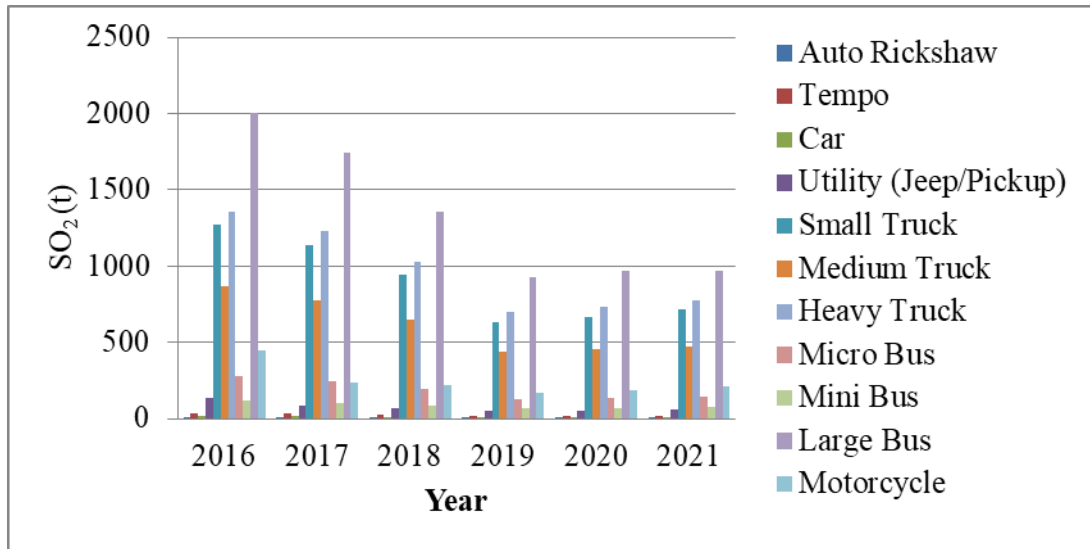

Figure 5.16: Possible yearly trend of SO<sub>2</sub> emission if lockdown had not occurred  
The reduction in the vehicular emission of SO<sub>2</sub> due to lockdown is shown in Figure 5.17.

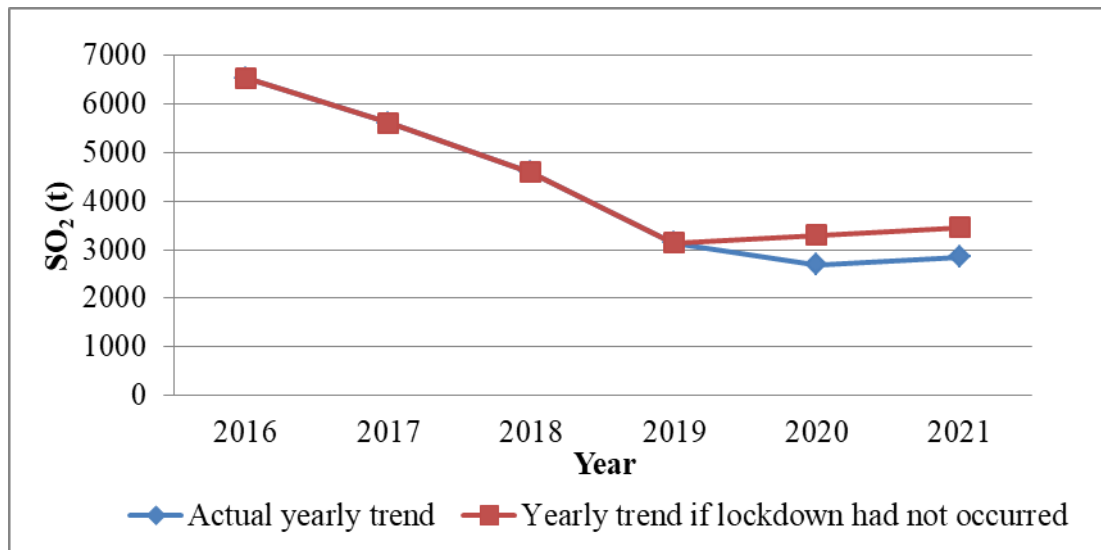

Figure 5.17: Graphical representation of decrease in total SO<sub>2</sub> emission due to lockdown

Thanks to the covid-19 lockdown, the total vehicular emissions of Sulfur dioxide was found to be 18.643% less than the expected in the year 2020 and it was found to be 17.726% less than the expected value in the year 2021.

The possible yearly PM 10 emission if lockdown had not occurred is shown in Figure 5.18.

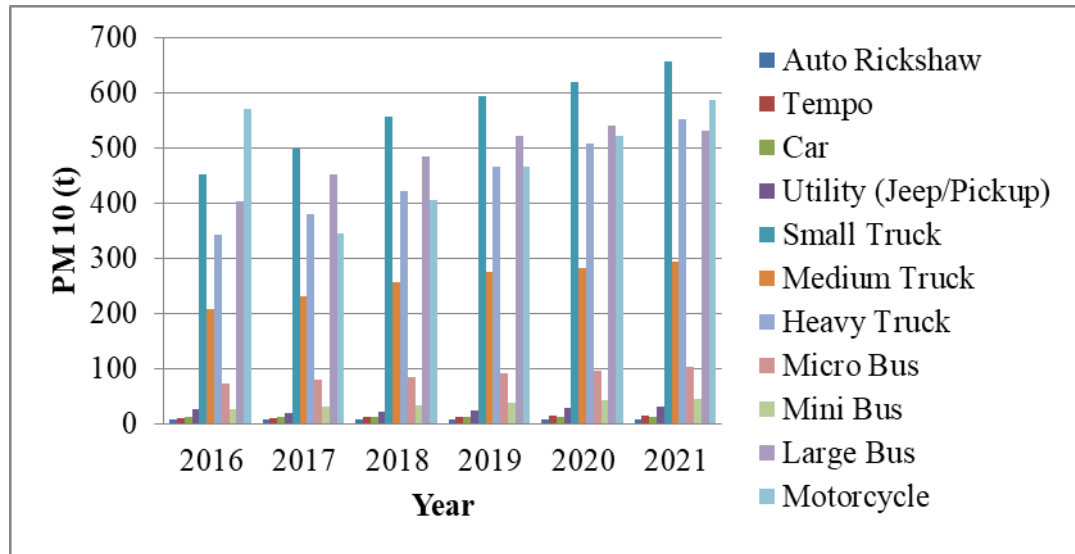

Figure 5.18: Possible yearly trend of PM 10 emission if lockdown had not occurred

The reduction in vehicular emission of PM 10 due to lockdown is shown in Figure 5.19.

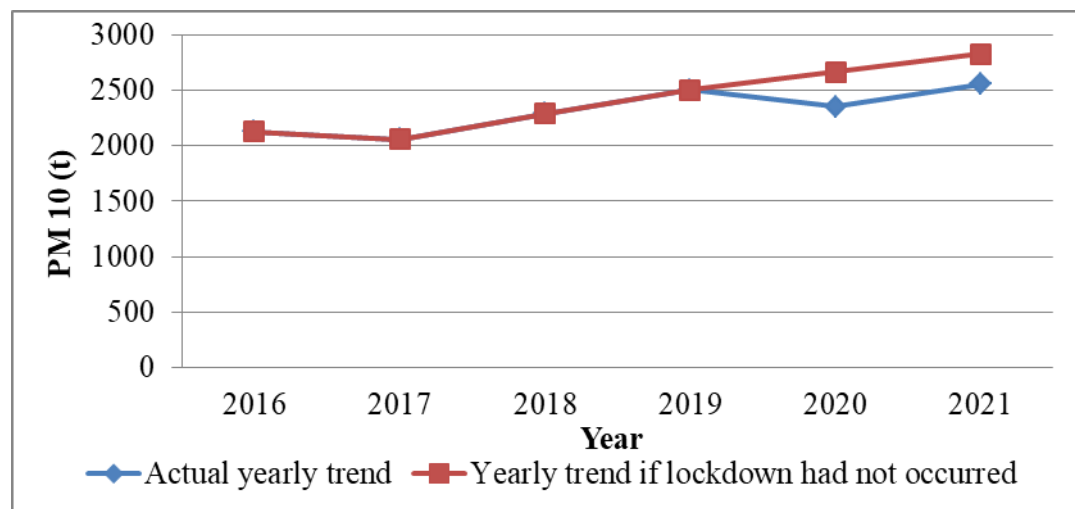

Figure 5.19: Graphical representation of decrease in total PM 10 emission due to lockdown

Thanks to the covid-19 lockdown, the total vehicular emissions of PM 10 was found to be 11.680% less than the expected in the year 2020 and it was found to be 9.763% less than the expected value in the year 2021.

The possible PM 2.5 emission if lockdown had not occurred is shown in Figure 5.20.

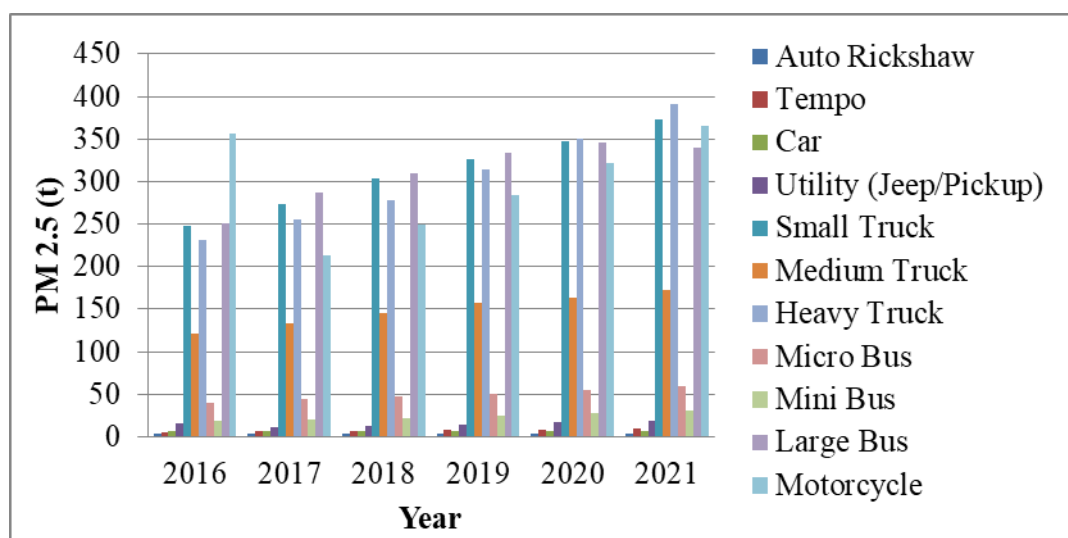

Figure 5.20: Possible yearly trend of PM 2.5 emission if lockdown had not occurred

The reduction in vehicular emission of PM 2.5 due to lockdown is shown in Figure 5.21.

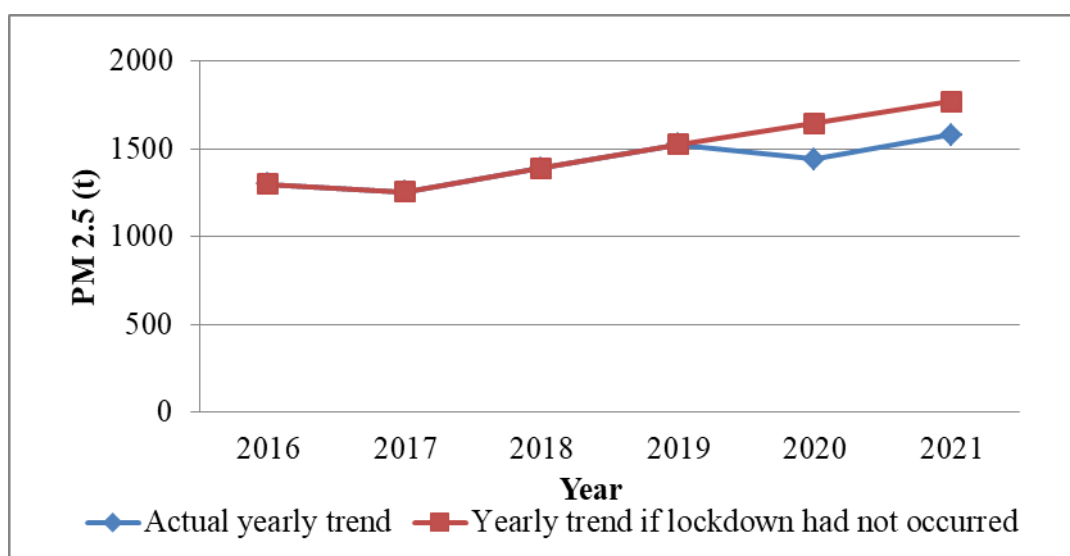

Figure 5.21: Graphical representation of decrease in total PM 2.5 emission due to lockdown

Thanks to the covid-19 lockdown, the total vehicular emissions of PM 2.5 was found to be 12.511% less than the expected in the year 2020 and it was found to be 10.709% less than the expected value in the year 2021.

The possible yearly trend of Nitrogen dioxide emission for different vehicle types if lockdown had not occurred is shown in Figure 5.22.

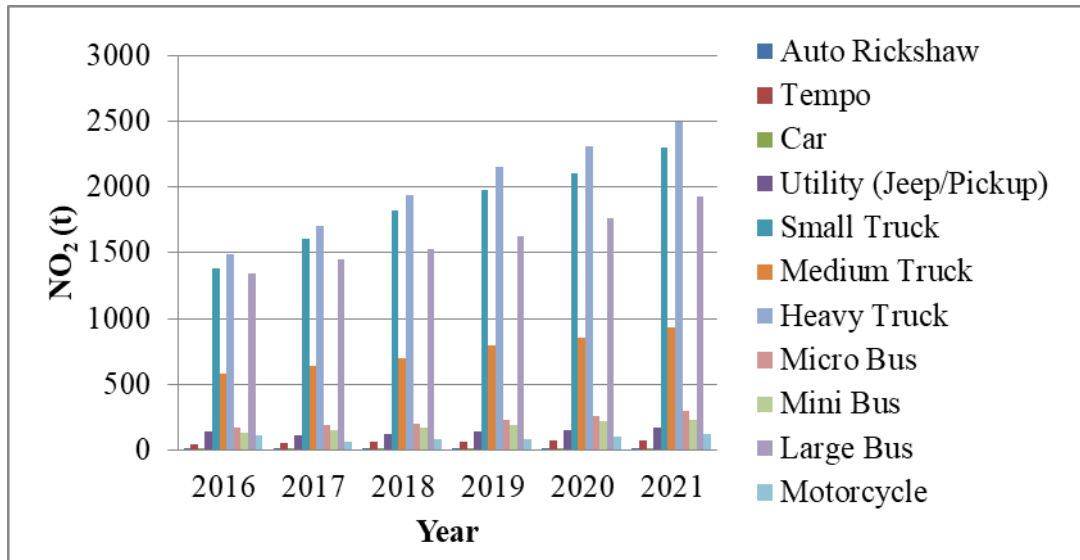

Figure 5.22: Possible yearly trend of NO<sub>2</sub> emission if lockdown had not occurred  
The reduction in the vehicular emission of NO<sub>2</sub> due to lockdown is shown in Figure 5.23.

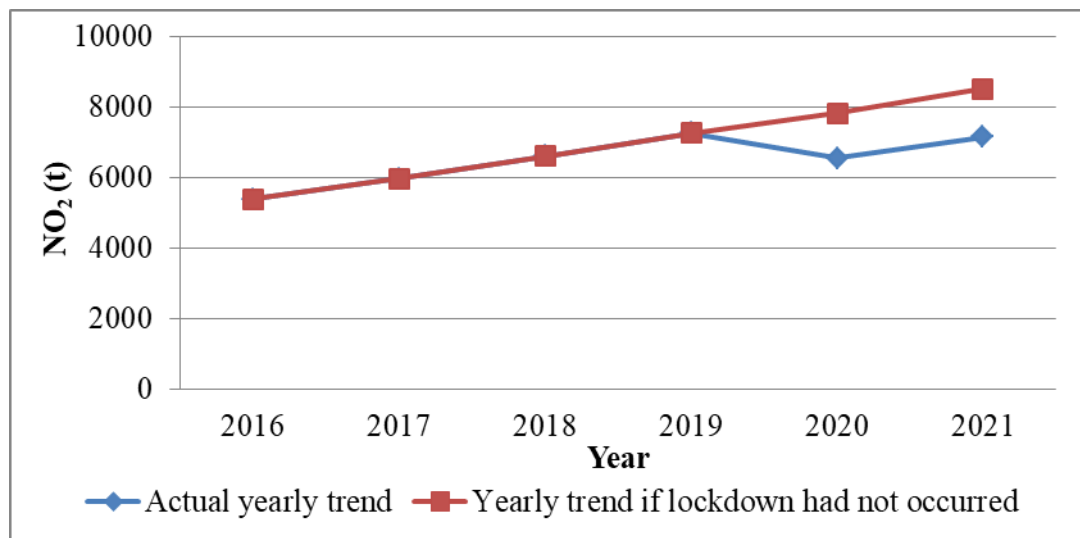

Figure 5.23: Graphical representation of decrease in total NO<sub>2</sub> emission due to lockdown

Thanks to the covid-19 lockdown, the total vehicular emissions of Nitrogen Dioxide was found to be 16.218% less than the expected in the year 2020 and it was found to be 16.200% less than the expected value in the year 2021.

The possible yearly trend of Nitrous oxide emission for different vehicle types if lockdown had not occurred is shown in Figure 5.24.

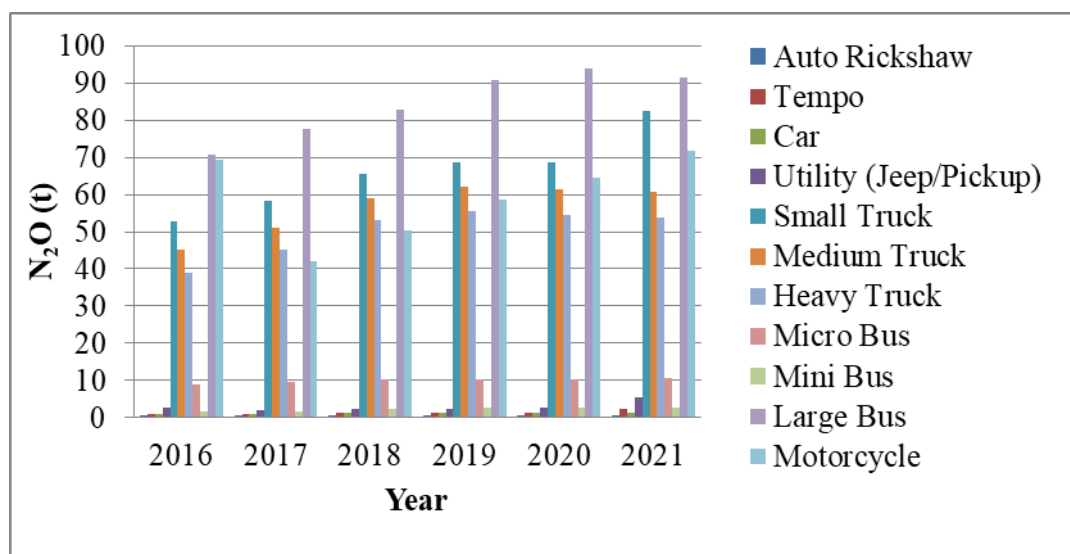

Figure 5.24: Possible yearly trend of  $N_2O$  emission if lockdown had not occurred  
The reduction in the vehicular emission of  $N_2O$  due to lockdown is shown in Figure 5.25.

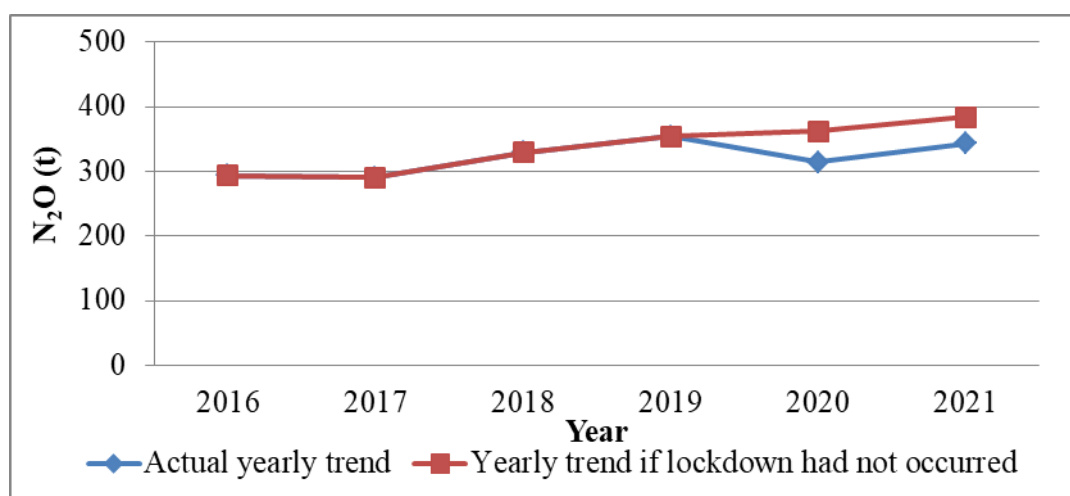

Figure 5.25: Graphical representation of decrease in total  $N_2O$  emission due to lockdown

Thanks to the covid-19 lockdown, the total vehicular emissions of Nitrous oxide gas was found to be 13.073% less than the expected in the year 2020 and it was found to be 10.615% less than the expected value in the year 2021.

The possible yearly trend of Ammonia emission for different vehicle types if lockdown had not occurred is shown in Figure 5.26.

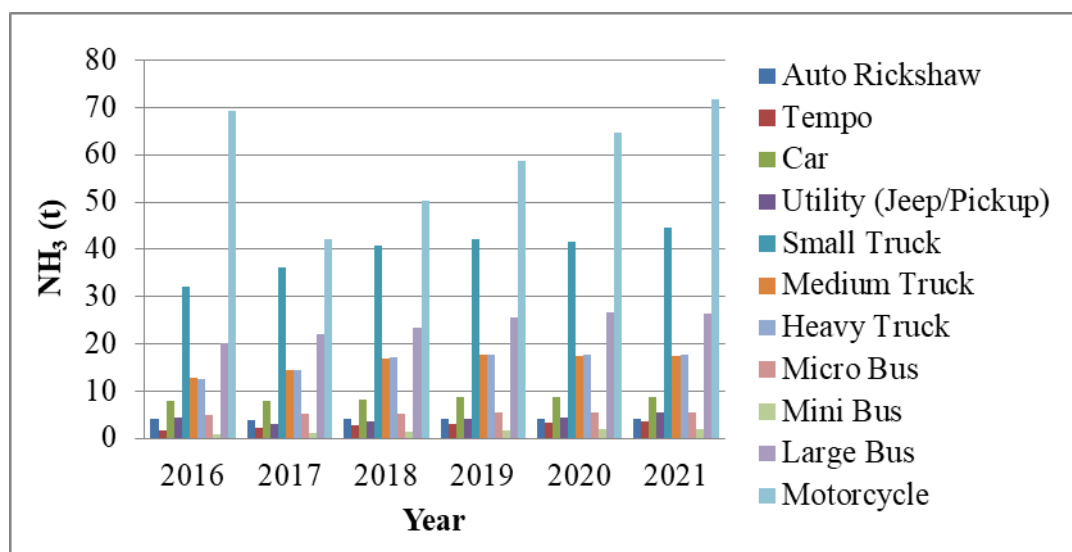

Figure 5.26: Possible yearly trend of NH<sub>3</sub> emission if lockdown had not occurred  
The reduction in the vehicular emission of NH<sub>3</sub> due to lockdown is shown in Figure 5.27.

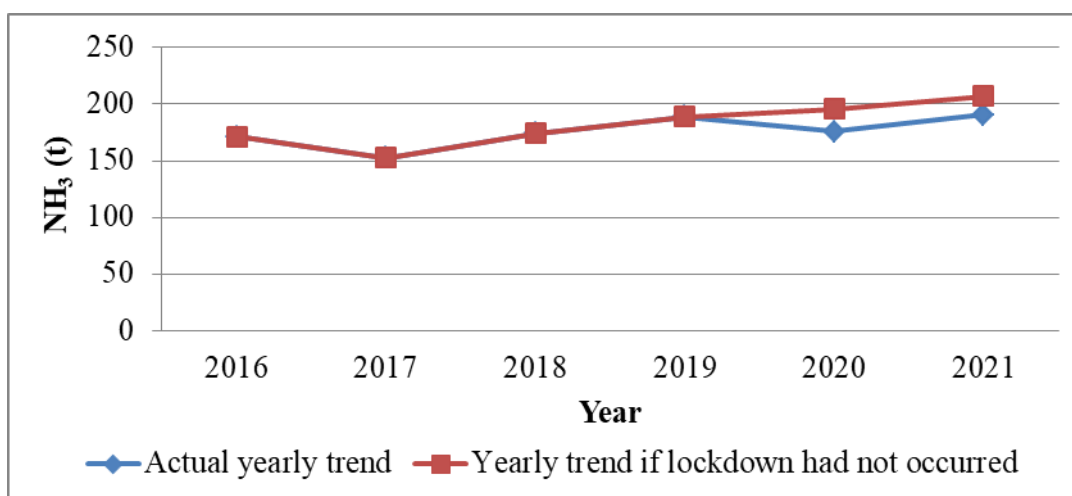

Figure 5.27: Graphical representation of decrease in total NH<sub>3</sub> emission due to lockdown

Thanks to the covid-19 lockdown, the total vehicular emissions of Ammonia gas was found to be 10.283% less than the expected in the year 2020 and it was found to be 8.1351% less than the expected value in the year 2021.

The possible yearly trend of Nitric oxide emission for different vehicle types if lockdown had not occurred is shown in Figure 5.28.

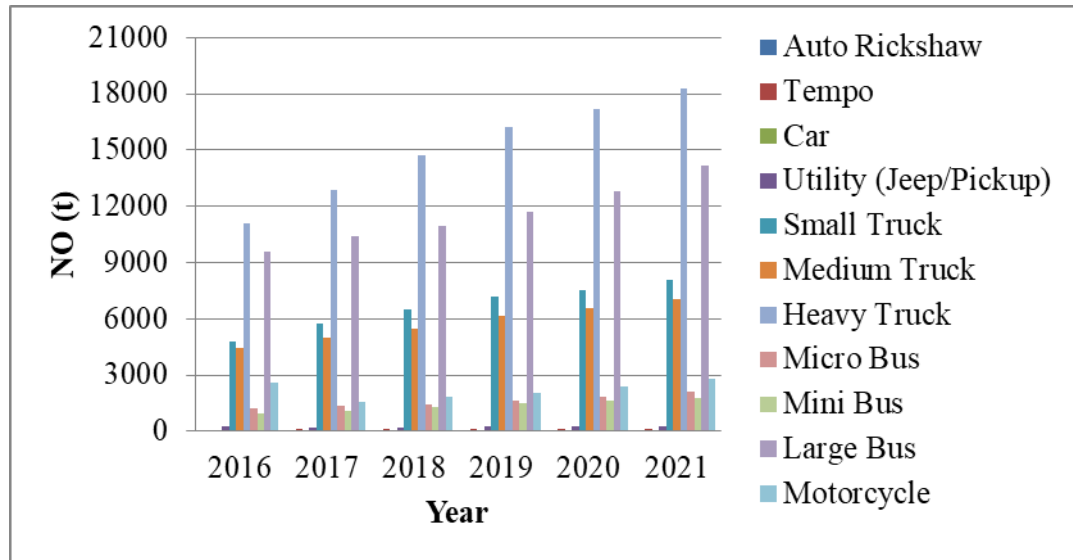

Figure 5.28: Possible yearly trend of NO emission if lockdown had not occurred

The reduction in the vehicular emission of NO due to lockdown is shown in Figure 5.29.

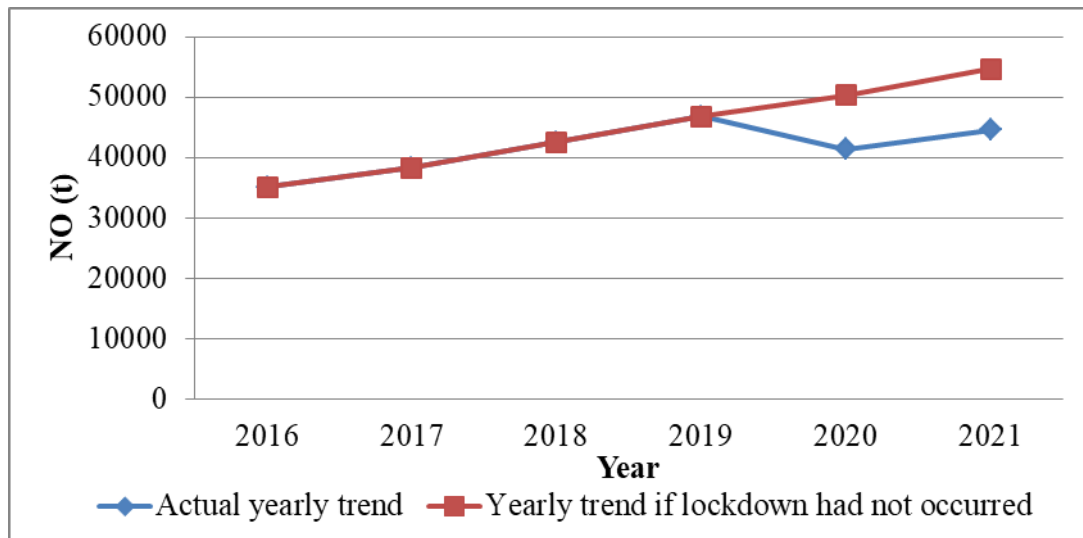

Figure 5.29: Graphical representation of decrease in total NO emission due to lockdown

Thanks to the covid-19 lockdown, the total vehicular emissions of Nitric oxide gas was found to be 17.856% less than the expected in the year 2020 and it was found to be 18.296% less than the expected value in the year 2021.

The possible yearly trend of the emission of volatile organic compounds for different vehicle types if lockdown had not occurred is shown in Figure 5.30.

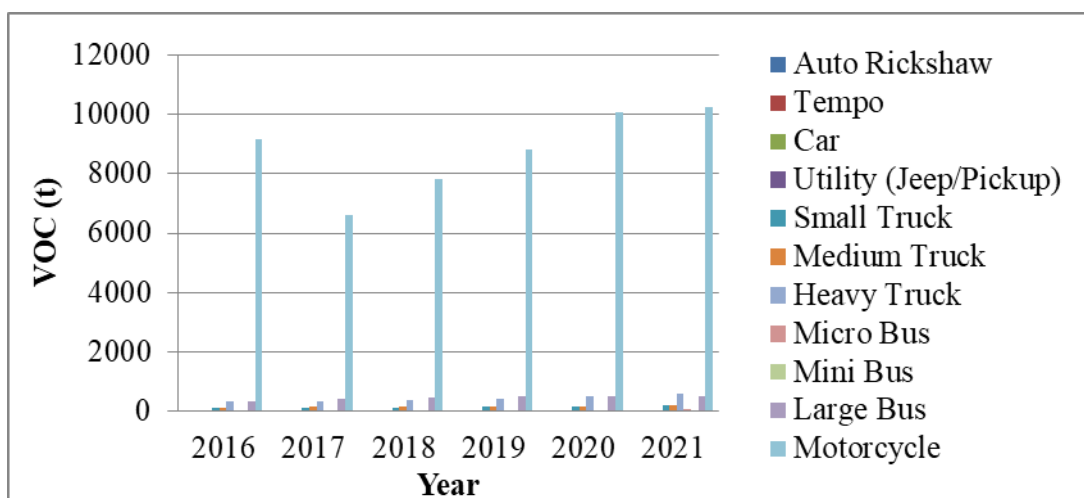

Figure 5.30: Possible yearly trend of VOC emission if lockdown had not occurred  
The reduction in vehicular emission of VOC due to lockdown is shown in Figure 5.31.

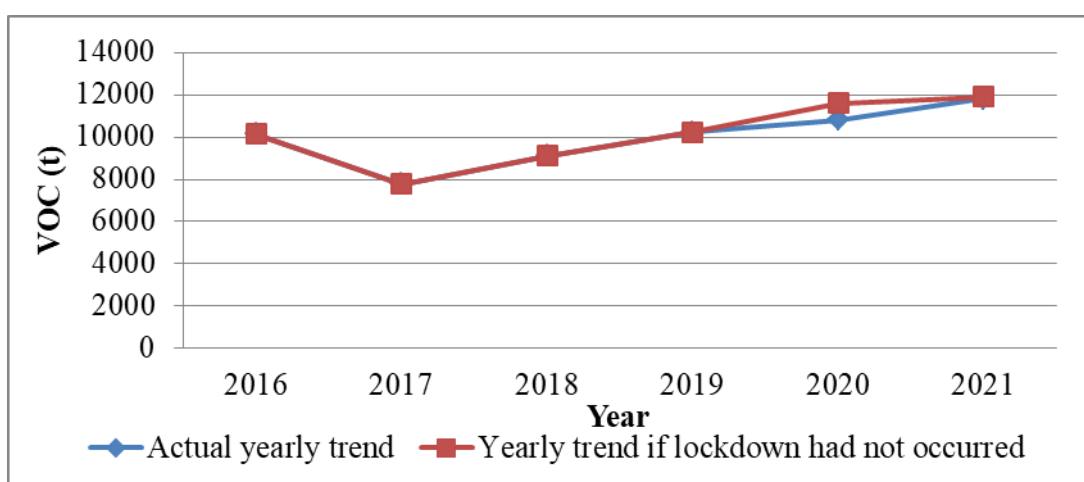

Figure 5.31: Graphical representation of decrease in total VOC emission due to lockdown

Thanks to the covid-19 lockdown, the total vehicular emissions of Volatile organic compounds was found to be 7.003% less than the expected in the year 2020 and it was found to be only 0.921% less than the expected value in the year 2021. Therefore there was a significant decrease in the emission of VOC in the year 2020 but a negligible change for the year 2021.

The possible yearly trend of the emission of non-methane volatile organic compounds for different vehicle types if lockdown had not occurred is shown in Figure 5.32.

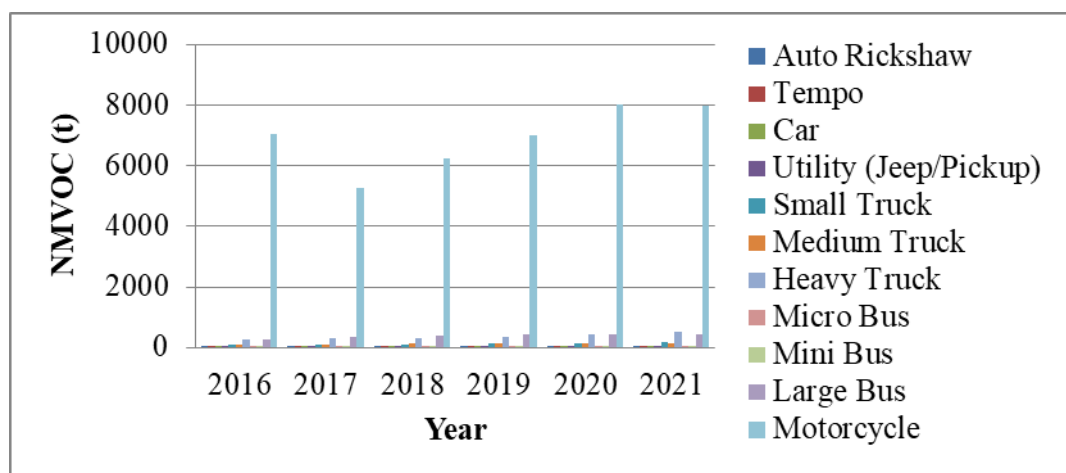

Figure 5.32: Possible yearly trend of NMVOC emission if lockdown had not occurred  
The reduction in the emission of NMVOC due to lockdown is shown in Figure 5.33.

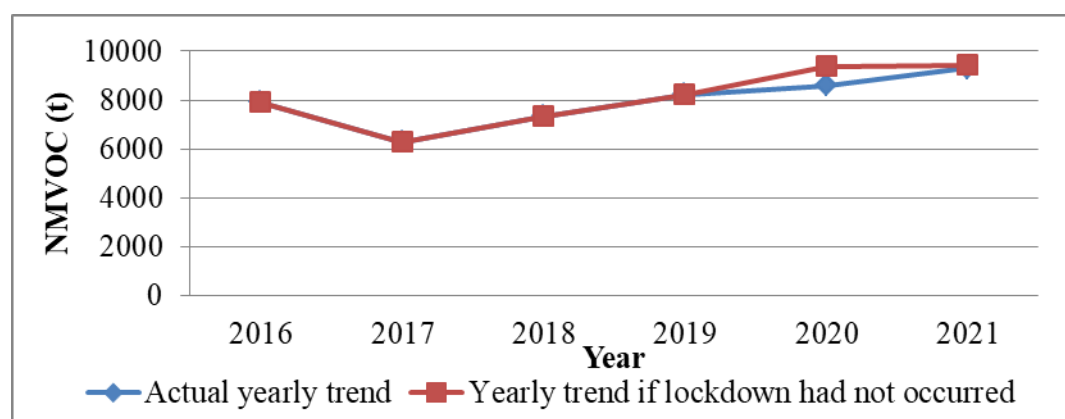

Figure 5.33: Graphical representation of decrease in total NMVOC emission due to lockdown

Thanks to the covid-19 lockdown, the total vehicular emissions of NMVOC was found to be 8.339% less than the expected in the year 2020 and it was found to be only 1.147% less than the expected value in the year 2021.

## 5.5 Comparative Analysis of Emission Characteristics of Different Types of Vehicles

The percent contribution of CO<sub>2</sub> by different vehicle types is shown in Figure 5.34.

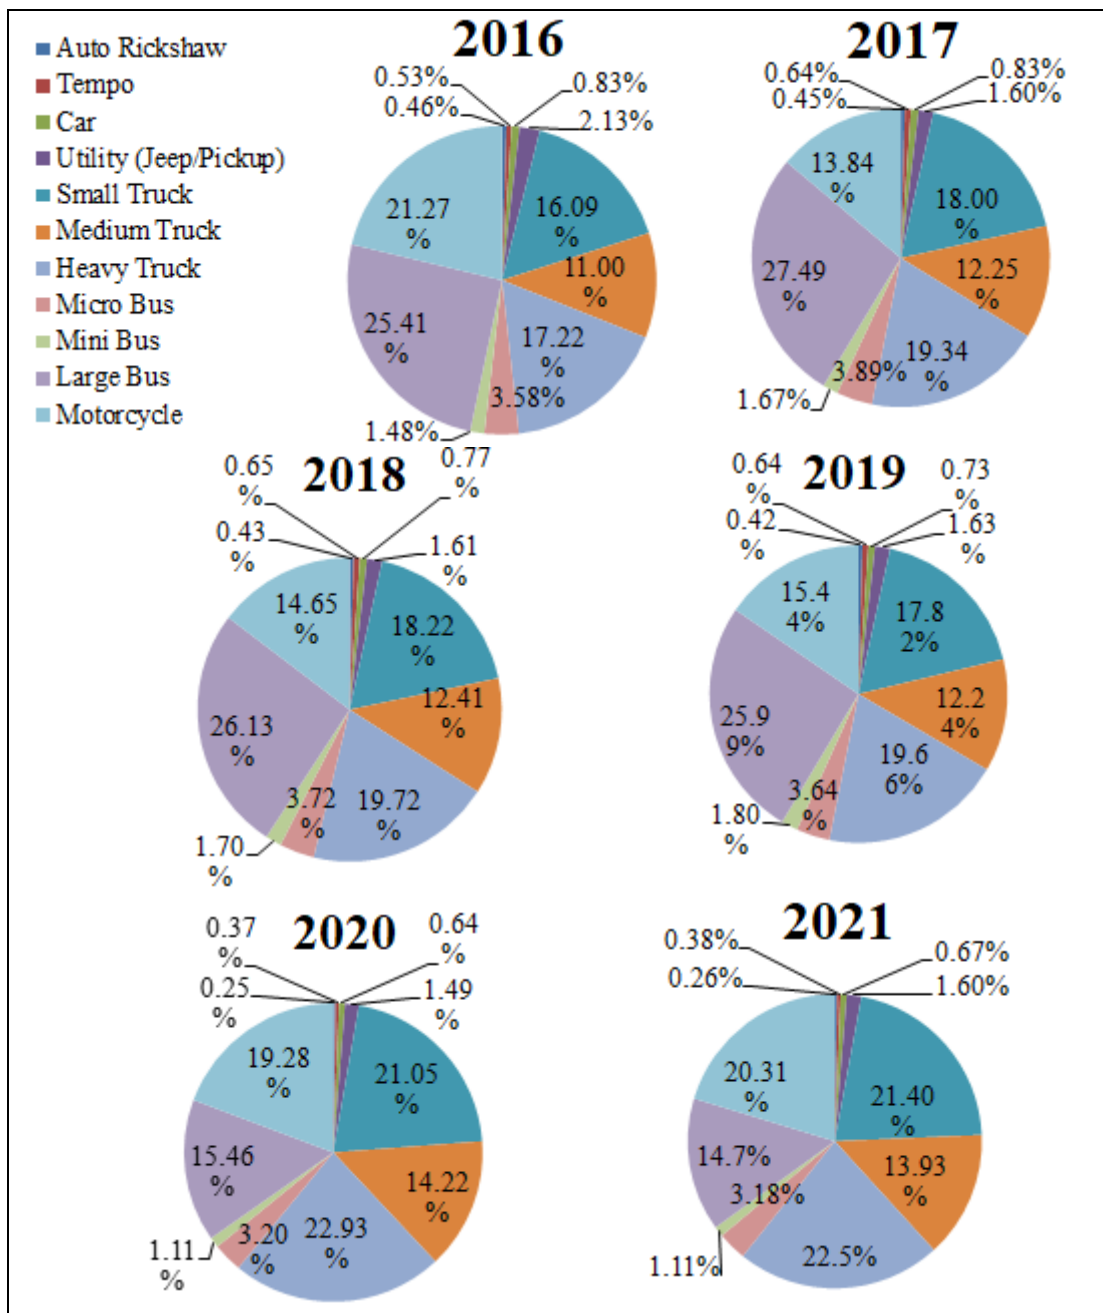

Figure 5.34: Contribution of vehicles to the emission of CO<sub>2</sub> throughout the years

From the year 2016 to 2019, large buses were found to be the biggest contributors to CO<sub>2</sub> emission and during covid-19, heavy trucks emitted the greatest amount of CO<sub>2</sub>. And throughout all the years, the vehicles contributing to the most significant quantity of CO<sub>2</sub> emission were large buses, heavy trucks, small trucks and motorcycles.

The percent contribution of CO by different type of vehicles is shown in Figure 5.35.

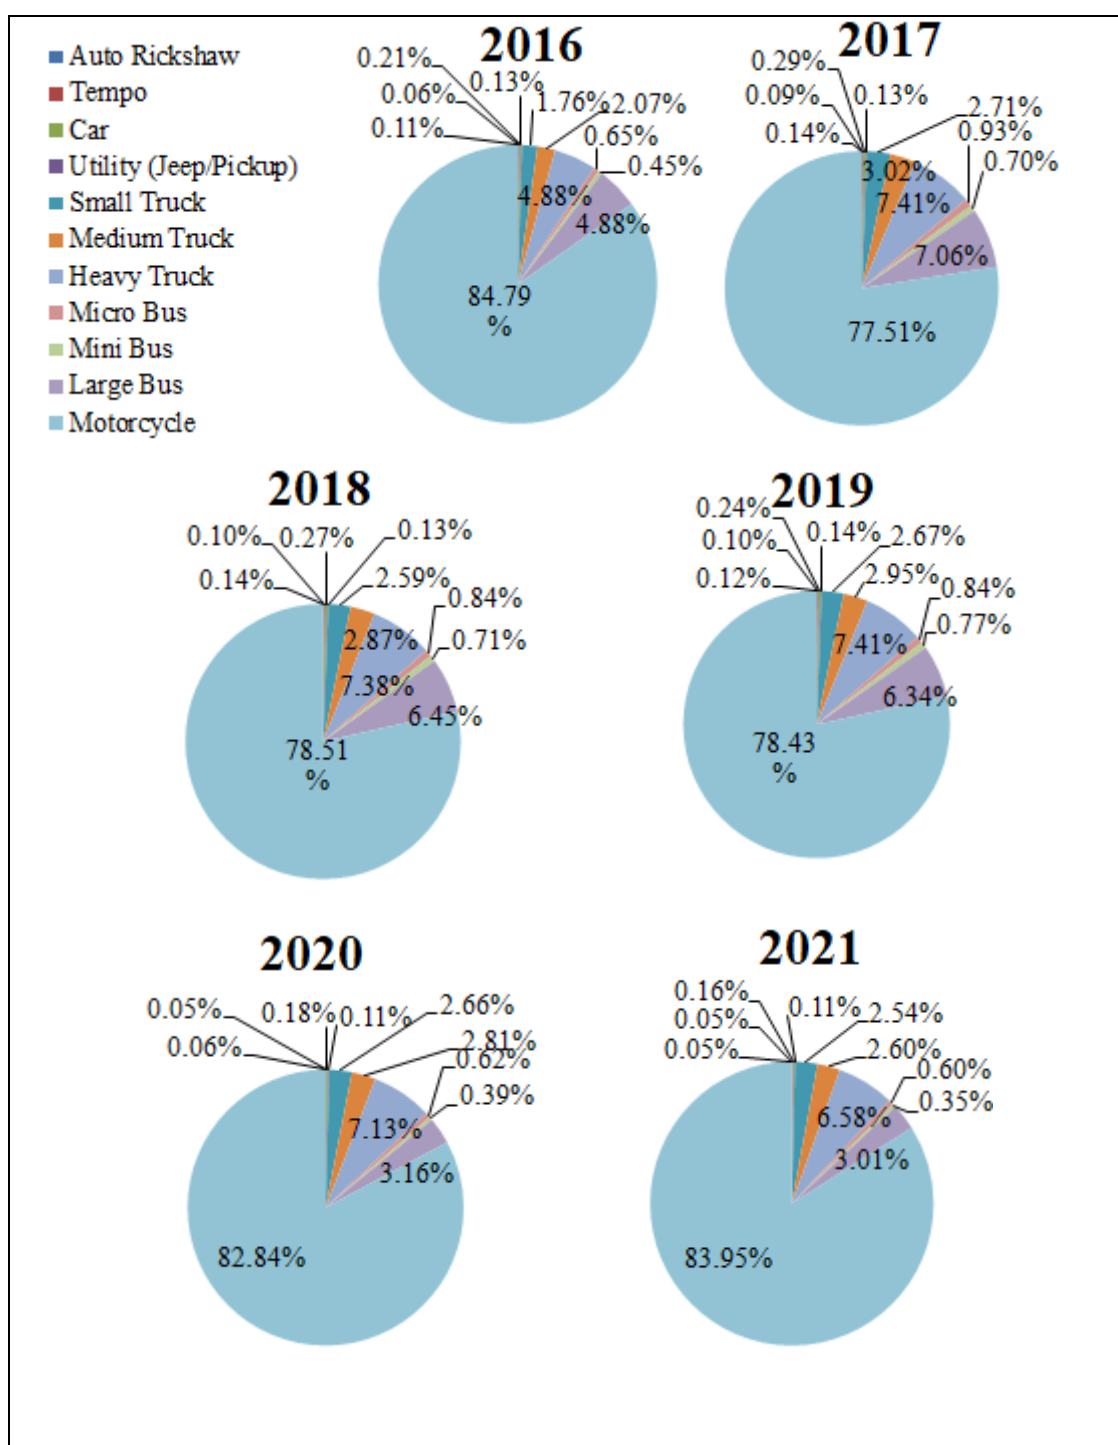

Figure 5.35: Contribution of vehicles to the emission of CO throughout the years

All throughout the years, the biggest contributors to CO emission were found to be motorcycles, heavy trucks, large buses, medium trucks and small trucks in decreasing order. 78% to 85% of CO emission was found to be produced from just Motorcycles. Thus the use of motorcycles is strongly discouraged in order to control the emission of CO.

The percent contribution of CH<sub>4</sub> by different type of vehicles is shown in Figure 5.36.

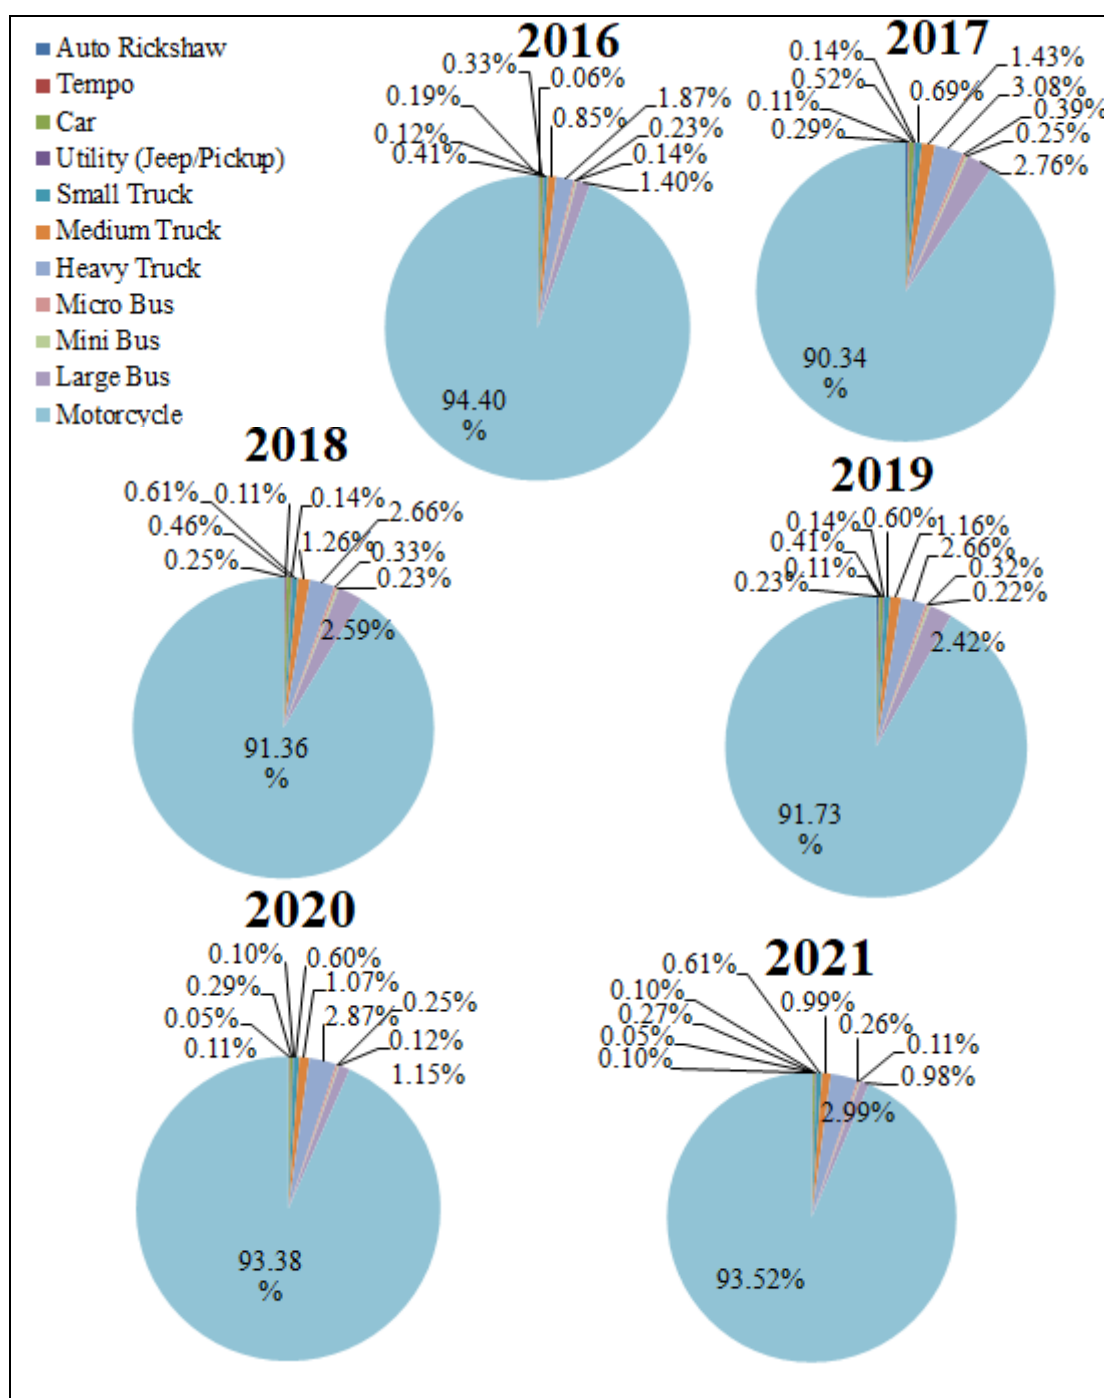

Figure 5.36: Contribution of vehicles to the emission of CH<sub>4</sub> throughout the years

All throughout the years, the biggest contributors to CH<sub>4</sub> emission were found to be motorcycles, heavy trucks, large buses and medium trucks in decreasing order. 90% to 94.4% of CH<sub>4</sub> emission was found to be produced by just motorcycles. Thus the use of motorcycles is strongly discouraged in order to control the emission of CH<sub>4</sub>.

The percent contribution of NO<sub>x</sub> by different type of vehicles is shown in Figure 5.37.

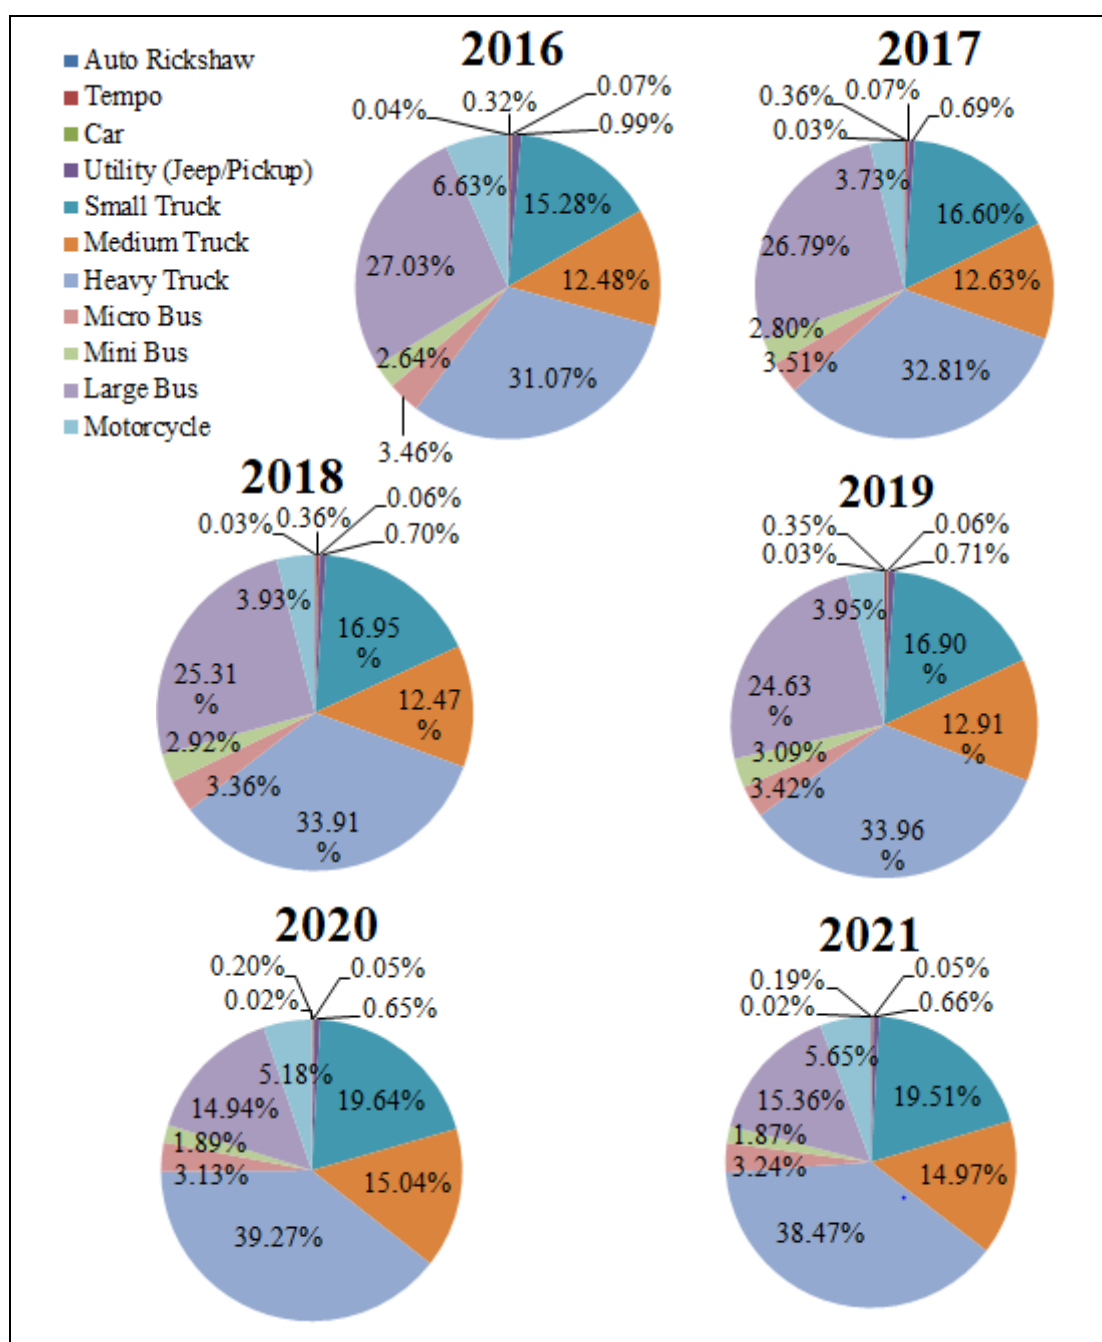

Figure 5.37: Contribution of vehicles to the emission of NO<sub>x</sub> throughout the years

All throughout the years, the vehicles contributing to the most significant quantity of NO<sub>x</sub> emission were found to be heavy trucks, large buses, small trucks and medium trucks, with heavy trucks being the largest contributor each year. 31.07 to 39.37% of NO<sub>x</sub> emission was found to be produced by just heavy trucks.

The percent contribution of SO<sub>2</sub> by different type of vehicles is shown in Figure 5.38.

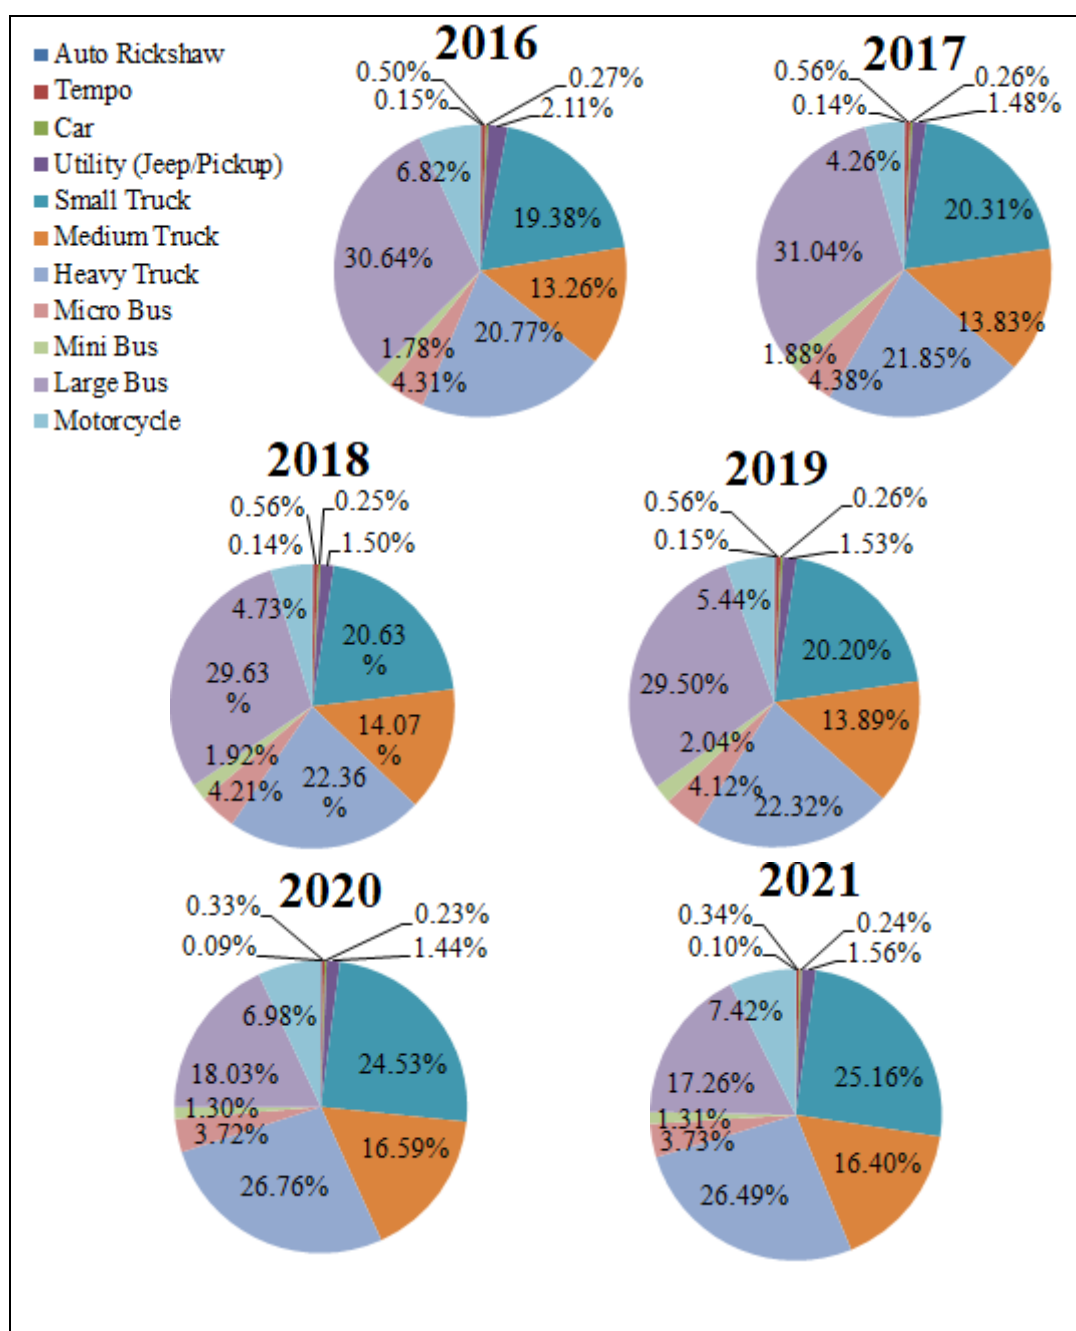

Figure 5.38: Contribution of vehicles to the emission of SO<sub>2</sub> throughout the years

From 2016 to 2019, the greatest contributor to SO<sub>2</sub> emission was found to be large buses but during 2020 and 2021 the largest contributor was heavy trucks, possibly due to restrictions of bus movement during the lockdown. Furthermore, small and medium trucks were also found to produce significant amounts of SO<sub>2</sub> throughout all the years.

The percent contribution of PM 10 by different type of vehicles is shown in Figure 5.39.

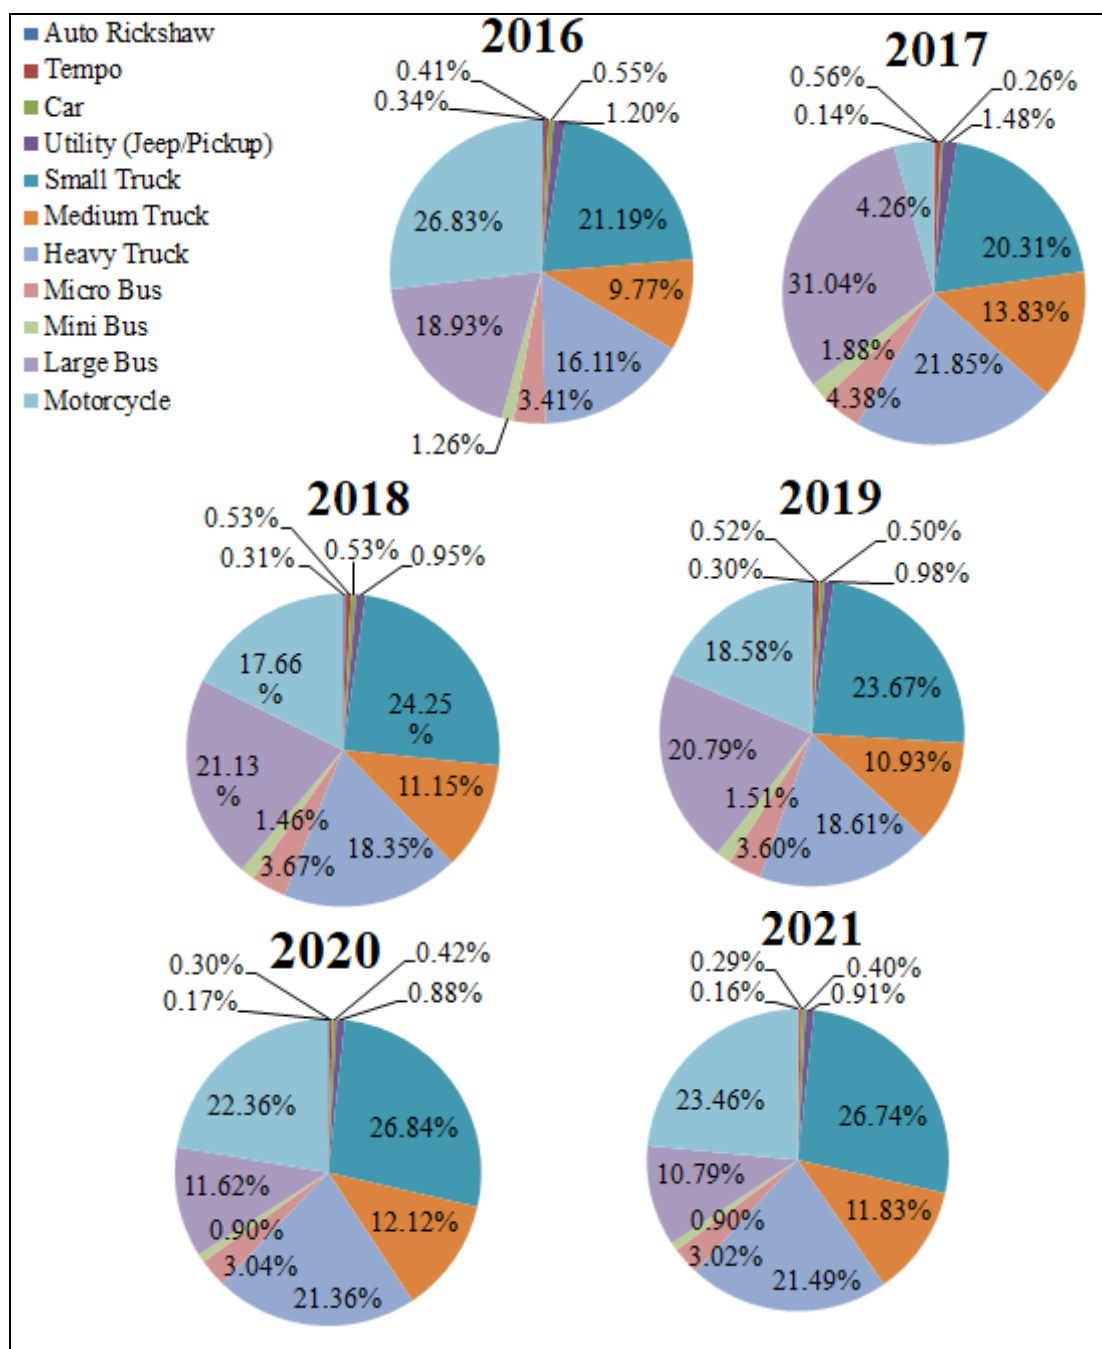

Figure 5.39: Contribution of vehicles to the emission of PM 10 throughout the years

The biggest contributor to the emission of PM 10 in the year 2016 was found to be motorcycles but from the year 2017 to 2021 it was found to be small trucks. Throughout all the years, small trucks, motorcycles, large buses, heavy trucks and medium trucks were all found to produce significant amounts of PM 10 emissions.

The percent contribution of PM 2.5 by different type of vehicles is shown in Figure 5.40.

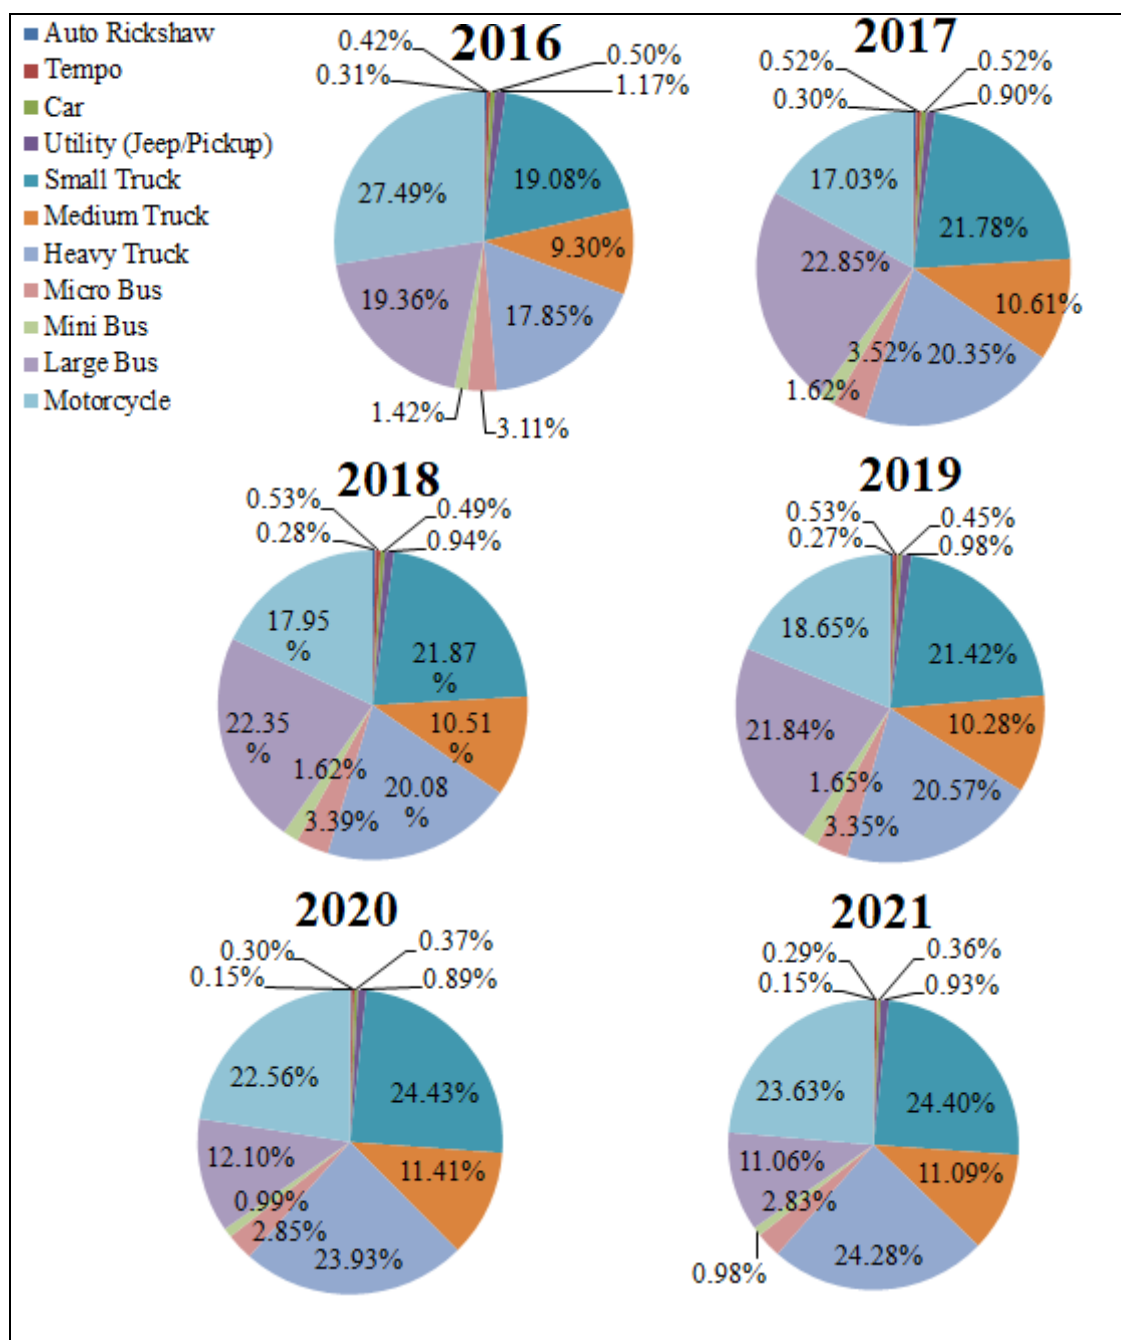

Figure 5.40: Contribution of vehicles to the emission of PM 2.5 throughout the years

The biggest contributor to the emission of PM 2.5 in the year 2016 was found to be motorcycles; from the year 2017 to 2019 it was found to be large buses and from the year 2020 and 2021 it was found to be small trucks. Throughout all the years, heavy trucks and medium trucks were also found to produce significant amounts of PM 2.5 emissions.

The percent contribution of NO<sub>2</sub> by different type of vehicles is shown in Figure 5.41.

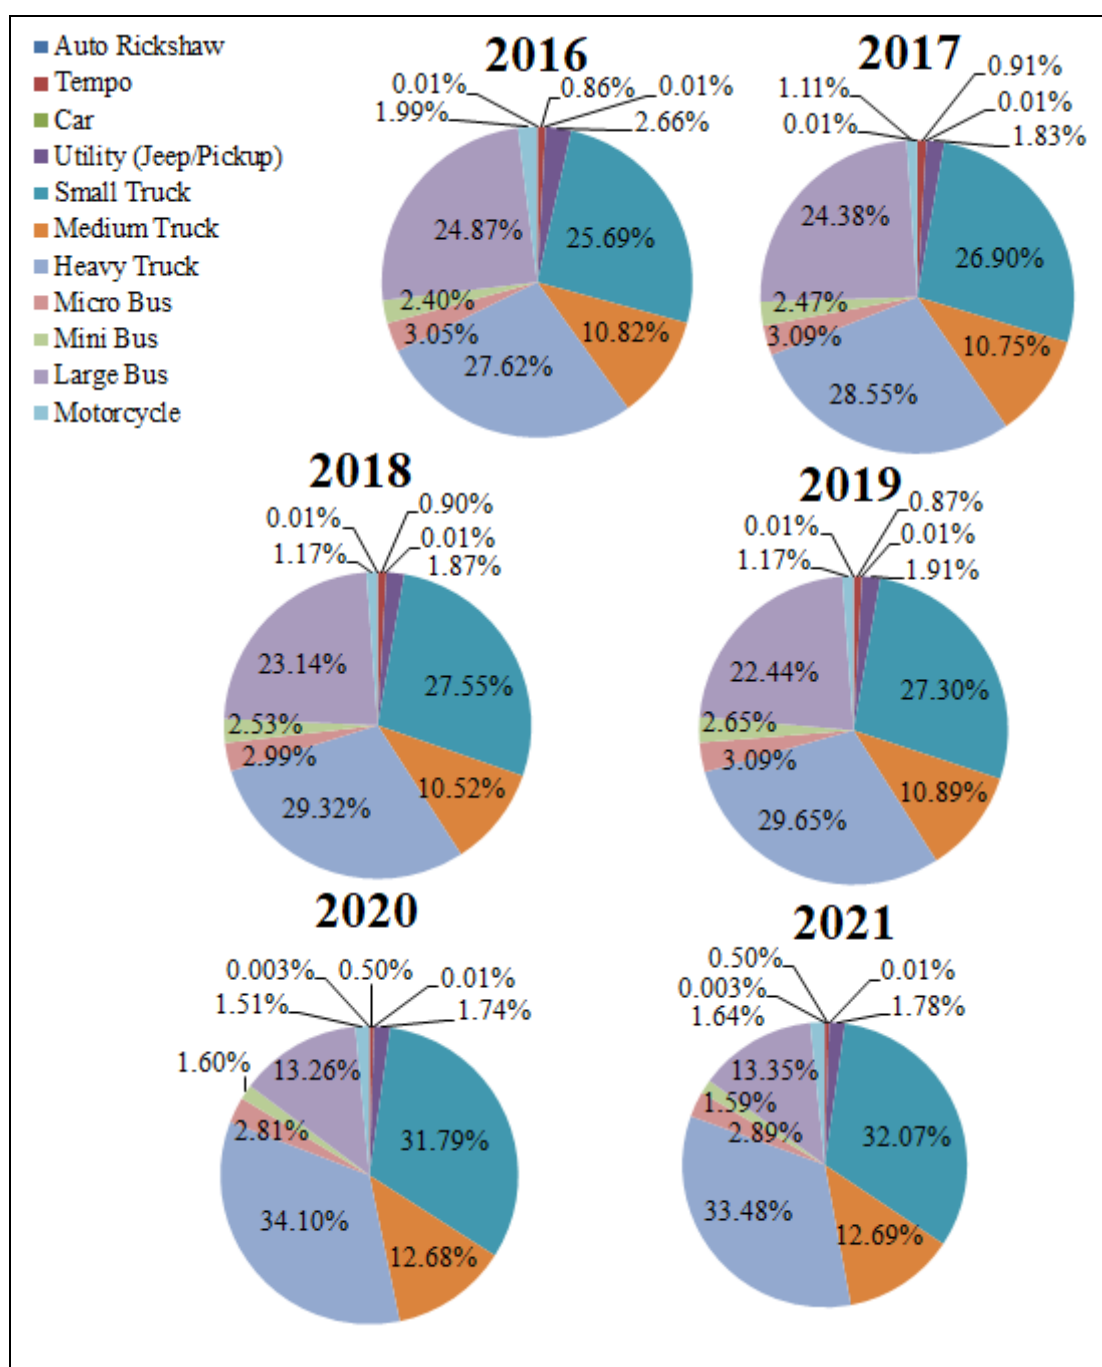

Figure 5.41: Contribution of vehicles to the emission of NO<sub>2</sub> throughout the years

The biggest contributor to the emission of NO<sub>2</sub> in the year 2016 was found to be motorcycles; from the year 2017 to 2019 it was found to be large buses and from the year 2020 and 2021 it was found to be small trucks. Throughout all the years, heavy trucks and medium trucks were also found to produce significant amounts of NO<sub>2</sub> emissions.

The percent contribution of N<sub>2</sub>O by different type of vehicles is shown in Figure 5.42.

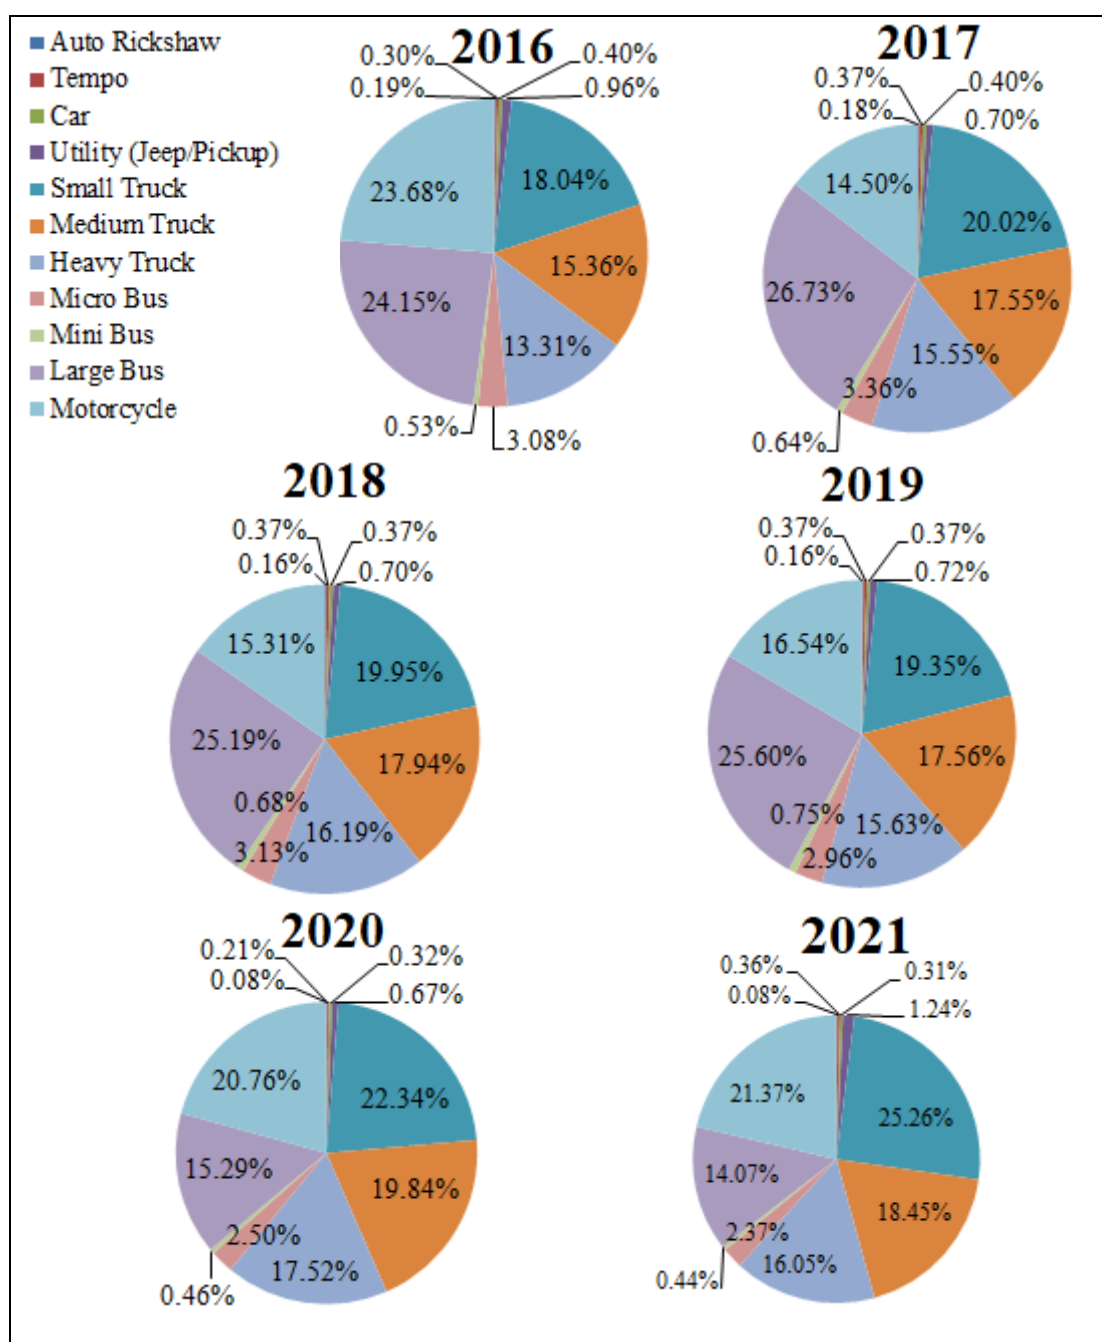

Figure 5.42: Contribution of vehicles to the emission of N<sub>2</sub>O throughout the years

From 2016 to 2019, the greatest contributor to N<sub>2</sub>O emission was found to be large buses but during 2020 and 2021 the largest contributor was found to be small trucks. Furthermore, motorcycles, medium trucks and heavy trucks were also found to produce significant amounts of N<sub>2</sub>O throughout all the years.

The percent contribution of NH<sub>3</sub> by different type of vehicles is shown in Figure 5.43.

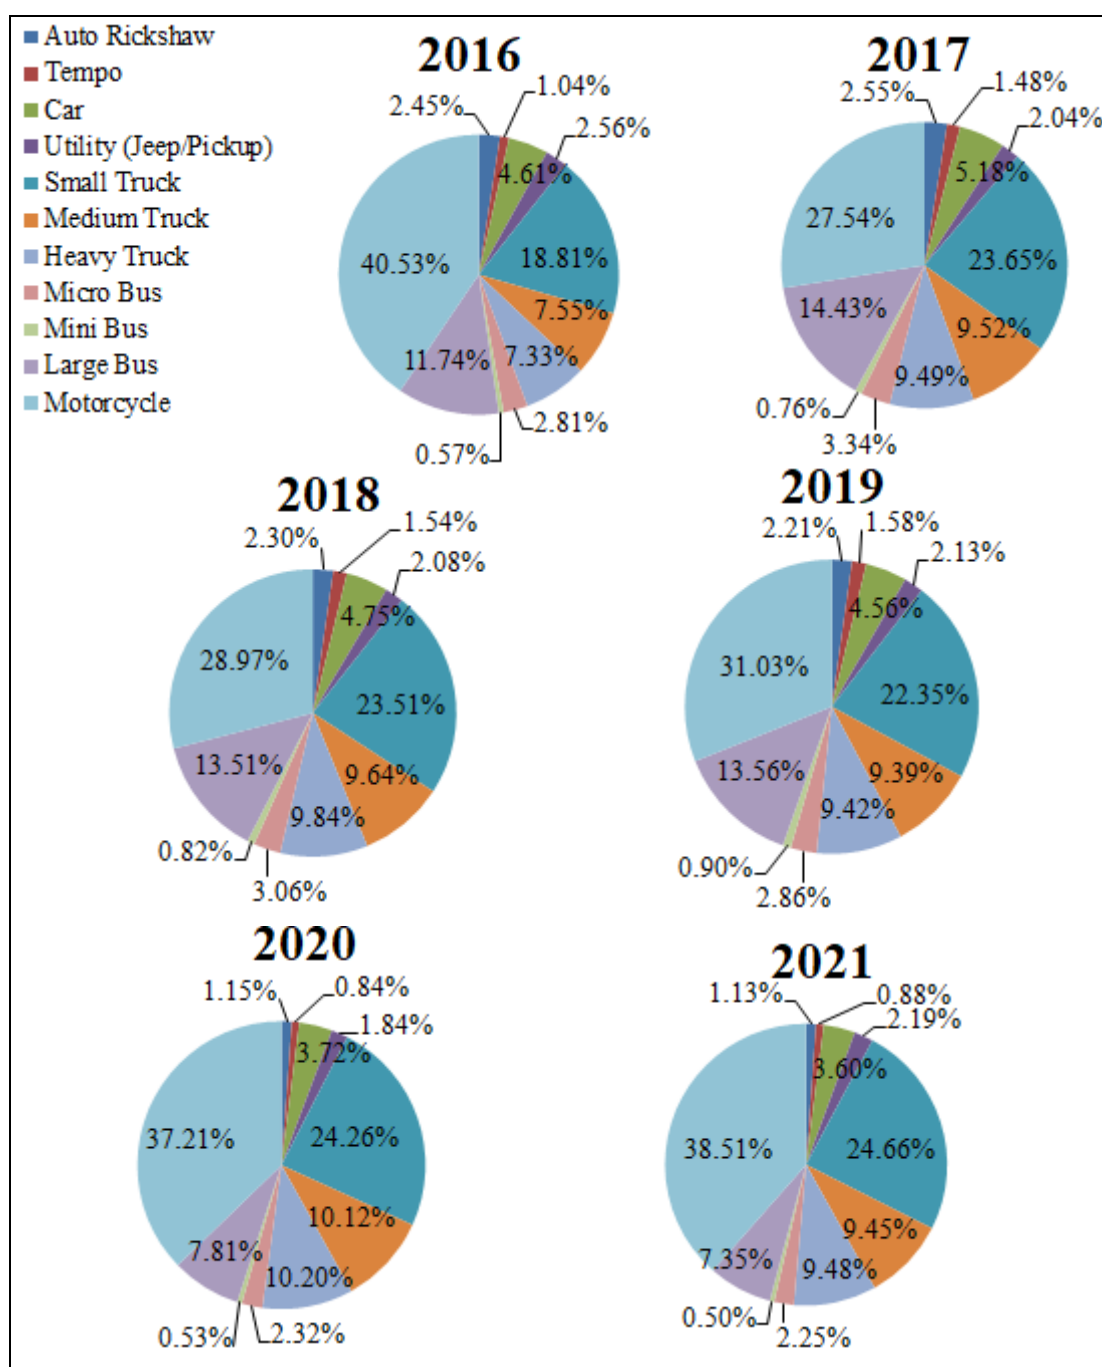

Figure 5.43: Contribution of vehicles to the emission of NH<sub>3</sub> throughout the years

Throughout all the years, the greatest contributors to the emission of NH<sub>3</sub> were found to be motorcycles and small trucks in decreasing order. Furthermore, heavy trucks, medium trucks and large buses were also found to contribute to a significant amount of NH<sub>3</sub> emission. 27.54% to 40.53% of NH<sub>3</sub> were produced by just motorcycles.

The percent contribution of NO by different type of vehicles is shown in Figure 5.44.

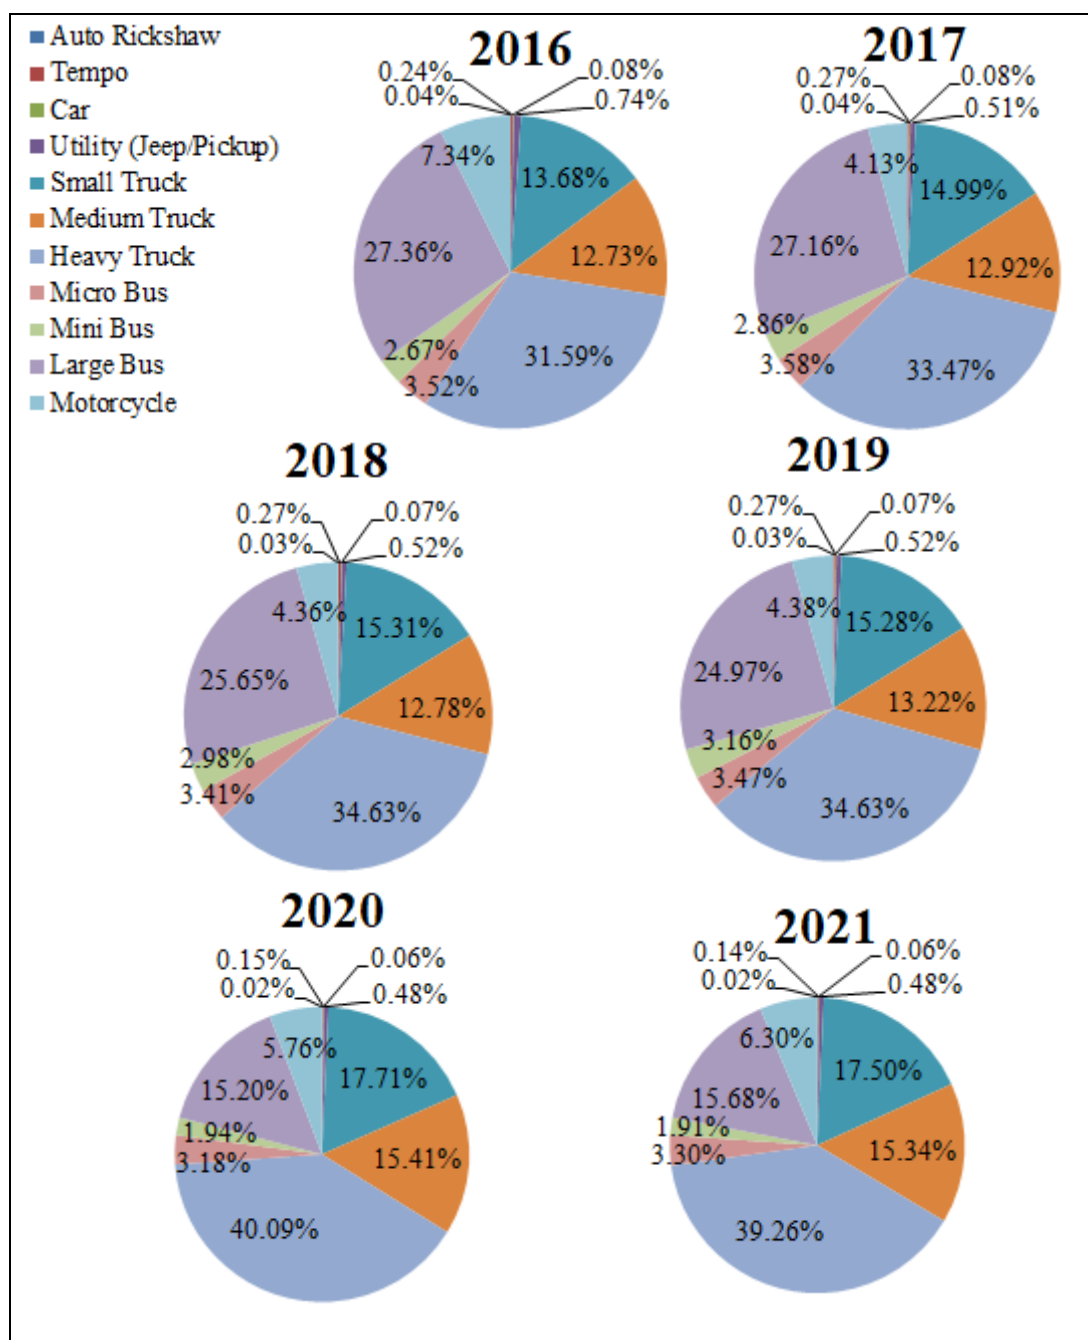

Figure 5.44: Contribution of vehicles to the emission of NO throughout the years

Throughout all the years, the greatest contributor to the emission of NO was found to be heavy trucks. 31.59% to 40.09% of NO emission was found to be produced by just heavy trucks. Furthermore, large buses, small trucks and medium trucks were also found to have significant contribution to the emission of NO.

The percent contribution of VOC by different type of vehicles is shown in Figure 5.45.

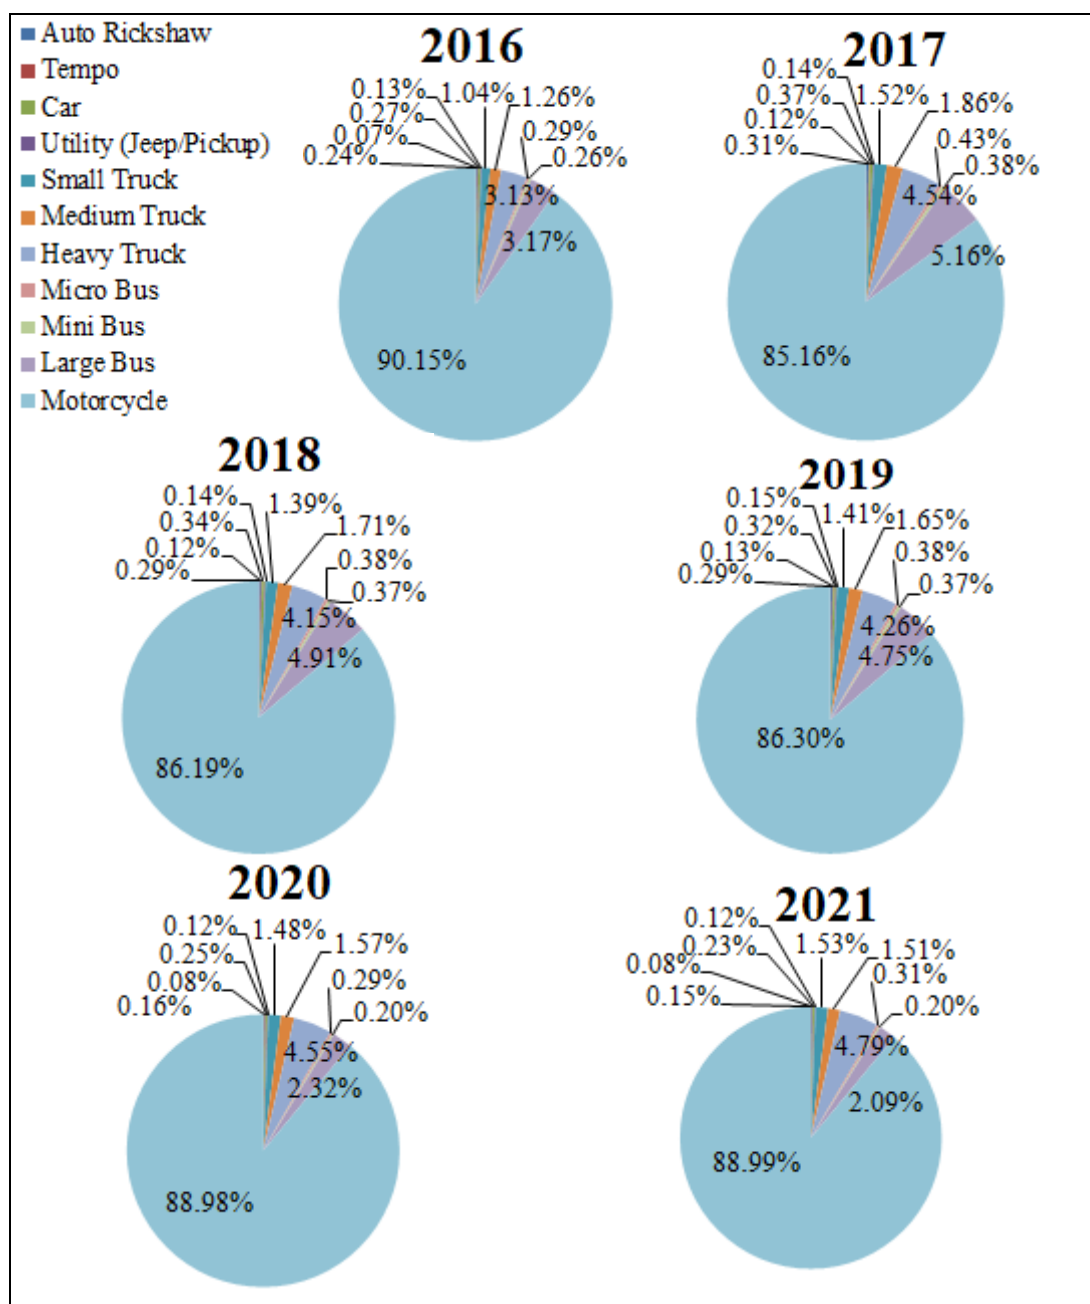

Figure 5.45: Contribution of vehicles to the emission of VOC throughout the years

Throughout all the years, the greatest contributor to the emission of VOC was found to be motorcycles. 85.16% to 90.15% of VOC emission was owed just to motorcycles. Furthermore, large buses, small trucks, medium trucks and heavy trucks were also found to have some contribution to the emission of VOC. Therefore, the use of motorcycles is strongly discouraged in order to control the emission of VOC.

The percent contribution of NMVOC by different vehicle types is shown in Figure 5.46.

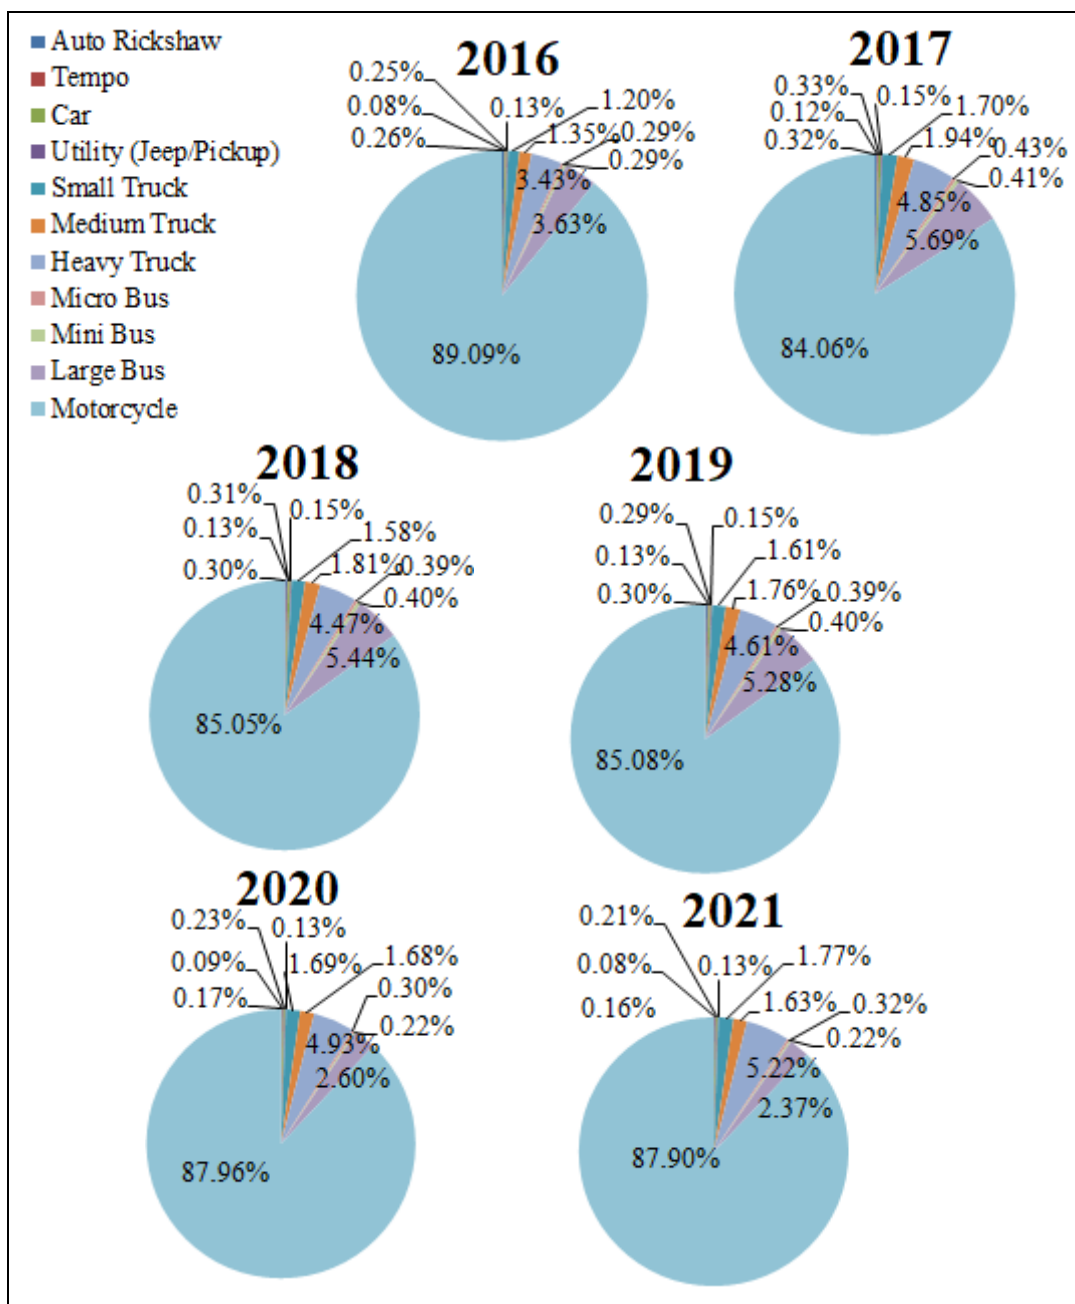

Figure 5.46: Contribution of vehicles to the emission of NMVOC throughout the years

Throughout all the years, the greatest contributor to the emission of NMVOC was found to be motorcycles. 84.06% to 89.09% of NMVOC emission was owed just to motorcycles. Furthermore, large buses, small trucks, medium trucks and heavy trucks were also found to have some contribution to the emission of NMVOC. Thus the use of motorcycles is strongly discouraged in order to control the emission of NMVOC.

## 5.6 Prediction for the Year 2025

The total quantity of emissions of 13 major pollutants and greenhouse gases found from the predicted analysis of 2025 are shown in Table 5.11.

Table 5.11: Total predicted emissions in 2025

| Pollutant/ GHG  | Emission (t) | Pollutant/ GHG                         | Emission (t) |
|-----------------|--------------|----------------------------------------|--------------|
| Carbon Dioxide  | 16651347.992 | Nitrogen Dioxide                       | 6746.508     |
| Carbon Monoxide | 56491.951    | Nitrous Oxide                          | 517.652      |
| Methane         | 3500.093     | Ammonia                                | 283.039      |
| Nitrogen Oxides | 51288.845    | Nitric oxide                           | 44542.337    |
| Sulfur Dioxide  | 4133.276     | Volatile Organic compounds             | 10315.505    |
| PM 10           | 2942.385     | Non-methane volatile organic compounds | 7457.633     |
| PM 2.5          | 1657.879     |                                        |              |

To provide a clearer picture, the graphical representation of the possible future trends for the emission of CO<sub>2</sub> is shown in Figure 5.47.

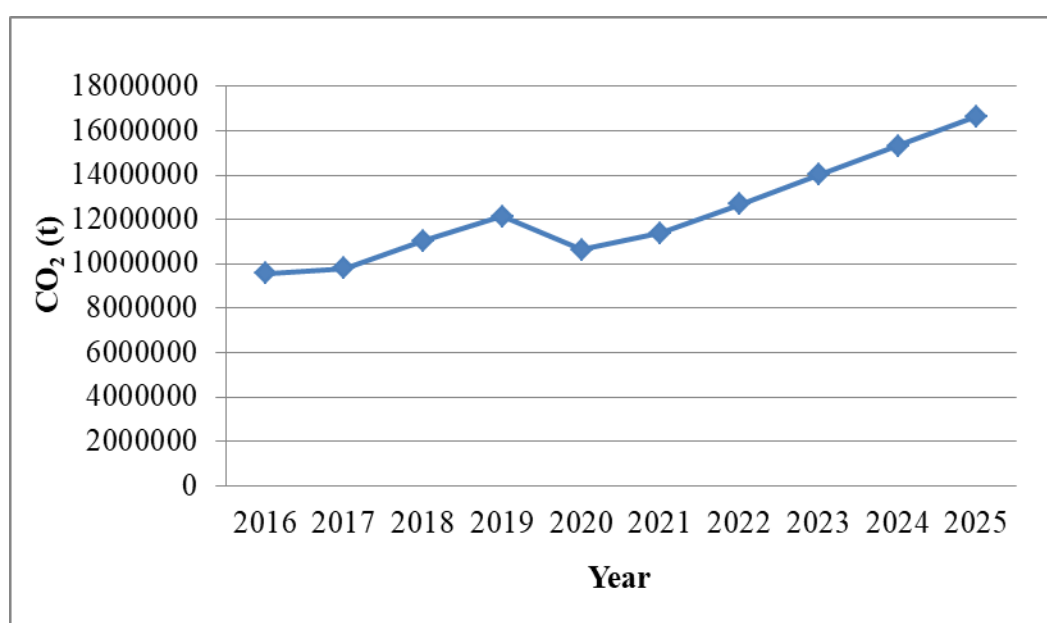

Figure 5.47: Emission of primary GHG Carbon Dioxide throughout the years and predicted emission up to 2025

The graphical representation of the possible future trends for the emission of other major pollutants and GHG's is shown in Figure 5.48.

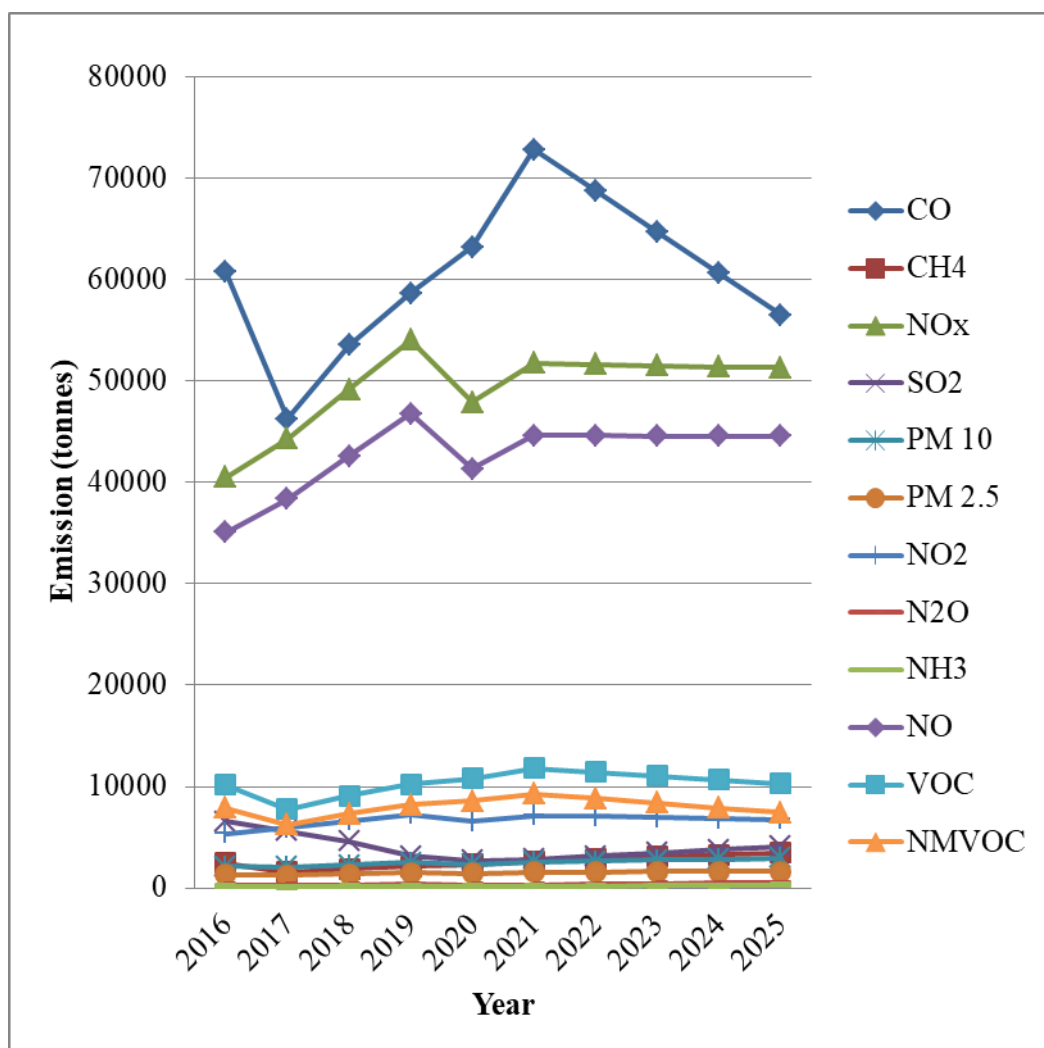

Figure 5.48: Emission of other major pollutants throughout the years and predicted emission up to 2025

The greatest concern for the year 2025 in terms of global warming is the possible increase in the amount of CO<sub>2</sub> emission as it is the primary greenhouse gas and the greatest percentage of vehicular exhaust fumes consist of CO<sub>2</sub>. But on the bright side, a decrease in the yearly emission of CO, NO<sub>x</sub>, NO<sub>2</sub>, NO, VOC and NMVOC can be expected owing to the implementation of newer and improved euro standard vehicles and a decrease in the number of vehicles with older technology.

## **CHAPTER 6**

### **CONCLUSIONS AND RECOMMENDATIONS**

The growth rate of registered vehicles is increasing rapidly and the complexity of maintaining proper guidance is getting out of hand. A large number of pollutants are generated from the transport sector and its continuous generation process is hampering people's daily life. The overall study findings and regarding recommendations have been presented in this chapter. This chapter concludes the study by pointing out the weakness inside the system and suggests the policy makers, planners as well as related authorities to take proper action on controlling vehicular emissions. This study used the European software COPERT 5.5 to estimate the vehicular emission of 13 major pollutants in Bangladesh from the year 2016 to 2021 and compared the results of yearly total quantity of primary GHG i.e. CO<sub>2</sub> emission in the transport sector of Bangladesh against a similar study made by World Bank for the years 2016, 2017 and 2018. This research also focuses on the COVID-19 situation and does a qualitative analysis of the lockdown effect on vehicular emission.

Although it seemed to be a devastating impact made by the pandemic, there was a small blessing in disguise, i.e. reduction in the damage caused by vehicular emissions.

***The key findings of this study are given below:***

- The percentage deviation of CO<sub>2</sub> emissions found using COPERT 5.5 from actual World Bank data was found to be 0.467% for the year 2016, 4.647% for the year 2017 and 2.382% for the year 2018, all of which is below 5%. Therefore the results of this study suggest that COPERT 5.5 may be a suitable emission model for Bangladesh.
- By carrying out analysis for the year 2020 and 2021 two times, once using actual data and again by assuming lockdown did not occur, an average decrease of 16.346% for CO<sub>2</sub>, 5.293% for CO, 17.824% for NO<sub>x</sub>, 18.184% for SO<sub>2</sub>, 10.722% for PM 10, 11.610% for PM 2.5, 16.209% for NO<sub>2</sub>, 11.844% for N<sub>2</sub>O, 9.209% for NH<sub>3</sub>, 18.076% for NO, 3.962% for VOC, and 4.743% for NMVOC was observed for the actual values with respect to the expected values if the lockdown had not occurred.

- From the comparative analysis of emission characteristics of different types of vehicles, it was found that heavy trucks, large buses, medium trucks, small trucks and motorcycles contribute to the greatest amount of emission of pollutants and GHG's. Just heavy trucks produced 31.07 to 39.37% of NOX, 27.62% to 34.10% of NO<sub>2</sub>, 31.59% to 40.09% of NO. 78% to 85% of CO, 90% to 94.4% of CH<sub>4</sub>, 27.54% to 40.53% of NH<sub>3</sub>, 85.16% to 90.15% of VOC and 84.06% to 89.09% of NMVOC emission was owed to just motorcycles.
- A set of emission factors for different types of pollutants have been found throughout the analysis and compared with the old emission factor which is used as base emission factor since 2012.

## **Recommendations**

A range of emission factors of different pollutants are found using COPERT 5.5 software for several kinds of vehicle technology and fuel type. These emission factors will help to develop a proper emission inventory for the transport sector. Since emission factors change with vehicle age, the emission factors can be found for different years and they can be used for predicting emission characteristics of vehicles by observing the change in emission factors with time. The emission factors found in this study are preferable for estimating the zonal emission rate from vehicles for Bangladesh.

Since the results of this study suggests that vehicular emission indeed decreased by a significant amount due to the covid-19 lockdown, this paper urges organizations in every sector of Bangladesh who have the capability of maintaining their efficiency through work from home, to continue doing so to prevent the situation to returning to the way it used to be.

Since motorcycles were found to contribute to the emission of scary amounts of CO, CH<sub>4</sub>, NH<sub>3</sub>, VOC and NMVOC, this paper attempts to discourage the use of motorcycles and to aid the public in selecting a less detrimental motorized vehicle if possible. Where it is not feasible to change the type of vehicle being driven, for example trucks being an irreplaceable mode of transport for goods and buses being an irreplaceable mode of public transport, the only possible mitigation measure is for the policy makers to mandate the replacement of heavy trucks, large buses, medium trucks and small trucks with that of improved technology (higher euro standard) in

order to produce less emission and thus bring about a deceleration in the inevitable worsening of the air quality of Bangladesh.

***Limitations and recommendations for further research***

- One major challenge of our study was the lack of recent information regarding current average speed and annual mileage of each type of vehicle, fuel type split and vehicle technology type split in Bangladesh. In order to obtain more accurate results by COPERT 5.5 for recent times, this paper requests the authority to carry out a study of current vehicle activity, fuel type and technology type.
- To successfully establish a suitable vehicular emission model for Bangladesh, researchers are recommended to test out the available emission software created by other countries by purchasing the license for those softwares to determine if the algorithm of any other software suits better for Bangladesh than that of COPERT 5.5.
- Moreover, it is vital to simultaneously check the results of the models by carrying out manual testing of emissions from vehicles in Bangladesh by suitable machines (Ex: PEMS), so this study strongly recommends the authority to invest in these machinery.
- Some default inputs regarding fuel and lubricant characteristics are considered during the analysis as suggested by the COPERT documentation.
- The discrepancy between real life emissions and COPERT results may be due to the fact that some vehicle technologies and fuel types that exist in Bangladesh were not available in COPERT. It is more beneficial if a standard emission model can be developed for Bangladesh for more adequate results of vehicular emission since COPERT is a European model.

## REFERENCES

- Aisudin, (2014). *Useful tips for buying a secondhand car in Bangladesh or in any country*. [online] Available at: [https://www.bdtips.com/tips-buy-secondhand-used-car-bd/?fbclid=IwAR3bCnajF4949mQ6FKHIXZtnk56wAUx41cVhfPRO9GB\\_btGeeUVZM6MwtG0](https://www.bdtips.com/tips-buy-secondhand-used-car-bd/?fbclid=IwAR3bCnajF4949mQ6FKHIXZtnk56wAUx41cVhfPRO9GB_btGeeUVZM6MwtG0) [Accessed 27 May 2022].
- Aksoy, A., Küçükoglu, İ., Ene, S., & Öztürk, N. (2014). Integrated emission and fuel consumption calculation model for the green supply chain management. *Procedia-Social and Behavioral Sciences*, Volume 109 (Issue 2).
- Alam, N.E. (2019). *National Workshop on Developing Clean and Efficient Vehicle Policy for Bangladesh*. [pdf] Dhaka: Clean Air Asia. Available at: [https://www.globalfueleconomy.org/media/708285/02\\_noorealam\\_bangladesh-baseline-and-trends.pdf](https://www.globalfueleconomy.org/media/708285/02_noorealam_bangladesh-baseline-and-trends.pdf) [Accessed 20 January 2022].
- Anwari, N., Ahmed, M.T., Islam, M.R., Hadiuzzaman, M. & Amin, S. (2021). Exploring the travel behavior changes caused by the COVID-19 crisis: A case study for a developing country. *Transportation Research Interdisciplinary Perspectives*, Volume 9.
- August-Roche-Magnus approximation. (2022). *Clausius- Clapeyron relation*. [online]. Wikipedia. Available at: [https://en.wikipedia.org/wiki/Clausius%E2%80%93Clapeyron\\_relation#Meteorology\\_and\\_climatology](https://en.wikipedia.org/wiki/Clausius%E2%80%93Clapeyron_relation#Meteorology_and_climatology) [Accessed 6 May 2022]
- Baidya, S. & Borken-Kleefeld, J. (2009). Atmospheric emissions from road transportation in India. *Energy Policy*, Volume 37 (Issue 10).
- Bangladesh Meteorological Department. (2021). *Monthly Normal Humidity (%)* [online]. Bangladesh Meteorological Department Official website. Available at: <http://bmd.gov.bd/p/Monthly-Humidity-Normal-Data>, [Accessed 22 January 2022].
- Bangladesh Meteorological Department. (2021). *Normal Maximum Temperature (°C)*. [online]. Bangladesh Meteorological Department Official website. Available at: <http://bmd.gov.bd/p/Monthly-Maximum-Temperature> [Accessed 22 January 2022].
- Bangladesh Meteorological Department. (2021). *Normal Minimum Temperature (°C)*. [online]. Bangladesh Meteorological Department Official website. Available at: <http://live4.bmd.gov.bd/p/Monthly-Minimum-Temperature>, [Accessed 22 January 2022].
- Basak J.K., Titumir, R.A.M. & Dey, N.C. (2013). Climate Change in Bangladesh: A Historical Analysis of Temperature and Rainfall Data. *Journal of Environment*, Volume 02 (Issue 02).

- BRTA. (2015). Bangladesh Road Transport Authority Official website. [online] Available at: <http://www.bрта.gov.bd/site/page/74b2a5c3-60cb-4d3c-a699-e2988fed84b2/Number-of-registered-Vehicles-in-Whole-BD> [Accessed 21 January 2022].
- Burón, J.M., Martinez, J.M.L., Izquierdo, F.A., Martín, M.Á., & García, A. (2004). Estimation of road transport emissions in Spain from 1988 to 1999 using COPERT III program. *Atmospheric Environment*, Volume 38 (Issue 5).
- Cai, H., Xie, S. (2007). Estimation of vehicular emission inventories in China from 1980 to 2005. *Atmospheric Environment*, Volume 41 (Issue 39).
- Climate transparency, (2020). *CLIMATE TRANSPARENCY REPORT BANGLADESH'S CLIMATE ACTION AND RESPONSES TO THE COVID-19 CRISIS*. Dhaka: Climate transparency. Available at: <https://www.climate-transparency.org/wp-content/uploads/2021/11/Bangladesh-CP2020.pdf> [Accessed on 20 February 2022]
- Condurat, M., Nicuță, A.M. & Andrei, R. (2017). Environmental impact of road transport traffic. A case study for the county of Iași road network. *Procedia Engineering*, Volume 181.
- Eastern Research Group. (2013). *Recommended Procedures for Development of Emissions Factors and Use of the WebFIRE Database*. Morrisville: US Environmental Protection Agency. Available at: <https://www3.epa.gov/ttnchie1/efpac/procedures/procedures81213.pdf> [Accessed on May 2 2022]
- Haddad, I.E., Marchand, N., Dron, J., Temime-Roussel, B., Quivet, E., Wortham, H., Voisin, D., Besombes, J.L. & Gille, G. (2009). Comprehensive primary particulate organic characterization of vehicular exhaust emissions in France. *Atmospheric Environment*, Volume 43 (Issue 39).
- EMISIA, (2022). EMISIA Official Website. [Online] Available at: <https://www.emisia.com/utilities/copert/> [Accessed 10 Jun. 2022].
- EPA.gov, (2021). *Overview of EPA's MOTO Vehicle Emission Simulator (MOVES3)*. [Pdf] Available at: <https://nepis.epa.gov/Exe/ZyPDF.cgi?Dockey=P1011KV2.pdf> [Accessed 10 Jun. 2022].
- Guo, D., Wang, Z. G., Sun, L., Li, K., Wang, J., Sun, F., & Zhang, H. (2018). Study on Gasoline Vehicle Emission Inventory Considering Regional Differences in China. *Journal of Advanced Transportation*, Volume 2018.
- Iqbal, A., Afroze, S., & Rahman, M. (2020). Vehicular PM emissions and urban public health sustainability: A probabilistic analysis for Dhaka City. *Sustainability*, Volume 12 (Issue 15).

- Kamruzzaman, M.H., & Mizunoya, T. (2019). Quantitative analysis of optimum corrective fuel tax for road vehicles in Bangladesh: achieving the greenhouse gas reduction goal. *Asia-Pacific Journal of Regional Science*, Volume 5 (Issue 1).
- Kholod, N., Evans, M., Gusev, E., Yu, S., Malyshev, V., Tretyakova, S. & Barinov, A. (2016). A methodology for calculating transport emissions in cities with limited traffic data: case study of diesel particulates and black carbon emissions in Murmansk. *Science of the Total Environment*, Volume 547.
- Labib, S.M., Mohiuddin, H. & Shakil, S.H. (2013). Transport sustainability of Dhaka: A measure of ecological footprint and means for the sustainable transportation system. *Journal of Bangladesh Institute of Planners*, Volume 6.
- Lang, J., Cheng, S., Wei, W., Zhou, Y., Wei, X. & Chen, D. (2012). A study on the trends of vehicular emissions in the Beijing-Tianjin-Hebei (BTH) region, China. *Atmospheric Environment*, Volume 62.
- Mansur, A.H. (2021). *Automobile sector development in Bangladesh: Challenges and prospects*. [online] Policy insights official website. Available at: <https://policyinsightsonline.com/2021/01/automobile-sector-development-in-bangladesh-challenges-and-prospects/> [Accessed 6 May 2022]
- Mortuza, M., Selmi, S., Khudri, M., Ankur, A.K. & Rahman, M. (2014). Evaluation of temporal and spatial trends in relative humidity and dew point temperature in Bangladesh. *Arabian Journal of Geosciences*, Volume 7 (Issue 12).
- Murrells, T. (2017). Method For Applying Emission Degradation Correction Factors To The COPERT 5 NO<sub>x</sub> Emission Factors For Petrol Cars and LGVs. [pdf] *The Department for Business, Energy, and Industrial Strategy is a department of the government of the United Kingdom*. Available at: [https://naei.beis.gov.uk/resources/Guidance\\_note\\_on\\_emission\\_degradation\\_method\\_for\\_NOx.pdf](https://naei.beis.gov.uk/resources/Guidance_note_on_emission_degradation_method_for_NOx.pdf) [Accessed 10 Jun. 2022].
- Ntziachristos, L. & Samaras, Z. (2021). *EMEP/EEA air pollutant emission inventory guidebook 2019*. [pdf] Copenhagen: European Environment Agency. Available at: <https://www.eea.europa.eu/publications/emep-eea-guidebook-2019/part-b-sectoral-guidance-chapters/1-energy/1-a-combustion/1-a-3-b-i> [Accessed 15 January 2022].
- Obida, A.M.A. (2021). *Motor Vehicles in Bangladesh*. [online] Dhaka School of Economics. Available at: [http://dsce.edu.bd/db/Number\\_of\\_Motor\\_Vehicles](http://dsce.edu.bd/db/Number_of_Motor_Vehicles) [Accessed 21 January 2022].
- O'Driscoll, R., ApSimon, H. M., Oxley, T., Molden, N., Stettler, M.E. & Thiyagarajah, A. (2016). A Portable Emissions Measurement System (PEMS) study of NO<sub>x</sub> and primary NO<sub>2</sub> emissions from Euro 6 diesel passenger cars and comparison with COPERT emission factors. *Atmospheric environment*, Volume 145.

- Papadimitriou, G., (2021). *Road transport stock and activity dataset for air pollutant and GHG emission calculations*. [pdf] Thessaloniki: EMISIA. Available at: [https://emisiasa-my.sharepoint.com/personal/thomas\\_p\\_emisia\\_com/\\_layouts/15/onedrive.aspx?ga=1&id=%2Fpersonal%2Fthomas%5Fp%5Femisia%5Fcom%2FDocuments%2FData%2FSIBYL%20Sample%2FSIBYL%5FSample%2Ezip&parent=%2Fpersonal%2Fthomas%5Fp%5Femisia%5Fcom%2FDocuments%2FData%2FSIBYL%20Sample](https://emisiasa-my.sharepoint.com/personal/thomas_p_emisia_com/_layouts/15/onedrive.aspx?ga=1&id=%2Fpersonal%2Fthomas%5Fp%5Femisia%5Fcom%2FDocuments%2FData%2FSIBYL%20Sample%2FSIBYL%5FSample%2Ezip&parent=%2Fpersonal%2Fthomas%5Fp%5Femisia%5Fcom%2FDocuments%2FData%2FSIBYL%20Sample) [Accessed 15 February 2022]. (Shared drive accessed on request).
- Pundir, B.P. (2012) *Revisions of vehicular emission standards for Bangladesh*. [pdf] Dhaka: Department of Environment. Available at: [http://case.doe.gov.bd/file\\_zone/feedback/Revisions%20of%20Vehicular%20Emission%20Standards%20for%20Bangladesh.pdf](http://case.doe.gov.bd/file_zone/feedback/Revisions%20of%20Vehicular%20Emission%20Standards%20for%20Bangladesh.pdf) [Accessed 26 January 2022].
- Rahman M. (2010). The Only Solution. [online] The Daily Star. Available at: [https://archive.thedailystar.net/forum/2010/march/only.htm?fbclid=IwAR2AQA11yHj4wJrv3zVCuUVO3qr\\_mSCvU9\\_SAKrL3-d7J8C74UHnS-P4KY8](https://archive.thedailystar.net/forum/2010/march/only.htm?fbclid=IwAR2AQA11yHj4wJrv3zVCuUVO3qr_mSCvU9_SAKrL3-d7J8C74UHnS-P4KY8) [Accessed 15 June 2022].
- Rakha, H., Ahn, K., El-Shawarby, I., & Jang, S. (2004). Emission model development using in-vehicle on-road emission measurements. *Annual Meeting of the Transportation Research Board, Washington, DC*, Volume 2.
- Randall, S., Sivertsen, B., Ahammad, S.S., Cruz, N.D. & Dam, V.T. (2015). *Emissions Inventory for Dhaka and Chittagong of Pollutants PM<sub>10</sub>, PM<sub>2.5</sub>, NO<sub>x</sub>, SO<sub>x</sub> and CO*. [pdf] Dhaka: Norwegian Institute for Air Research (NILU). Available at: [https://doe.portal.gov.bd/sites/default/files/files/doe.portal.gov.bd/page/cdbe516f\\_1756\\_426f\\_af6b\\_3ae9f35a78a4/2020-06-10-16-30-6a8801bba5009c814b7d5cbeebdbd3aa.pdf](https://doe.portal.gov.bd/sites/default/files/files/doe.portal.gov.bd/page/cdbe516f_1756_426f_af6b_3ae9f35a78a4/2020-06-10-16-30-6a8801bba5009c814b7d5cbeebdbd3aa.pdf) [Accessed on 3 December 2021].
- RHD, (2017). *Review of existing Road User Cost (RUC) estimation procedure used in RHD and update the same under BRRL during the year 2016-2017*. [pdf] Roads and Highways Department. Available at: [https://rhd.portal.gov.bd/sites/default/files/files/rhd.portal.gov.bd/page/f2d0af0d\\_cfed4bce\\_a16f\\_22eef21ef0c0/Draft\\_Final\\_RUC\\_27\\_03\\_18.pdf](https://rhd.portal.gov.bd/sites/default/files/files/rhd.portal.gov.bd/page/f2d0af0d_cfed4bce_a16f_22eef21ef0c0/Draft_Final_RUC_27_03_18.pdf) [Accessed 10 Jun. 2022].
- RHD. (2001). *Manual Classified Traffic Counts Instruction guide*. [pdf]. Dhaka: Roads and Highways Department. Available at: <https://www.rhd.gov.bd/Documents/ConvDocs/Traffic%20Counts%20Manual.pdf> [Accessed May 6 2022].
- Saija, S. & Romano, D. (2002). A methodology for the estimation of road transport air emissions in urban areas of Italy. *Atmospheric Environment*, Volume 36 (Issue 34).
- Sung, J. & Monschauer, Y. (2020). *Changes in transport behavior during the covid-19 crisis*. [online] International Energy Agency Official Website. Available at:

<https://www.iea.org/articles/changes-in-transport-behaviour-during-the-covid-19-crisis> [Accessed 6 May 2022].

Thambiran T, Diab, R.D. (2011) Air pollution and climate change co-benefit opportunities in the road transportation sector in Durban, South Africa. *Atmospheric Environment*, Volume 45 (Issue 16).

Time and date, (2022). *Past weather in Bangladesh* [online]. Time and date official website. Available at: <https://www.timeanddate.com/weather/> [Accessed 6 May 2022].

World Bank (2014). *World Bank Official Website*. [online]. Available at: <https://data.worldbank.org/indicator/EN.CO2.TRAN.ZS?locations=BD> [Accessed 3 February 2022].

World Bank (2018). *World Bank Official Website*. [online]. Available at: <https://data.worldbank.org/indicator/EN.ATM.CO2E.KT?end=2018&locations=BD&start=1990&view=chart> [Accessed 3 February 2022].

Worldometer. Bangladesh CO2 Emissions. [online] Available at: <https://www.worldometers.info/co2-emissions/bangladesh-co2-emissions/> [Accessed 10 Jun. 2022].

Zachariadis, T. & Samaras, Z. (1999). An integrated modeling system for the estimation of motor vehicle emissions. *Journal of the Air & Waste Management Association*, Volume 49 (Issue 9).

Zachariadis, T., Ntziachristos, L., & Samaras, Z. (2001). The effect of age and technological change on motor vehicle emissions. *Transportation Research Part D: Transport and Environment*, Volume 6 (Issue 3).

Zafri, N.M., Afroj, S. & Ali, M.A (2020). Effectiveness of Containment Strategies to Control Vehicular Traffic on Roads in Dhaka, Bangladesh during COVID-19 Pandemic: Use of Google Map Based Real-Time Traffic Data. *SSRN Electronic Journal*.
