# Supplementary material for: Investigating the applicability of COPERT 5.5 emission software in Bangladesh and developing countrywide vehicular emission inventories
Source: Royal Society of Chemistry journal article supplement (doi:10.1039/d3ea00047h), 2023-11-21
Supplement: d3ea00047h1.zip [file d3ea00047h1.zip]

## Sheet: CIRCULATION_ACTIVITY
Category	Fuel	Segment	Euro Standard	Urban Peak Share [%]	Urban Off Peak Share [%]	Rural Share [%]	Highway Share [%]	Urban Peak Speed [km/h]	Urban Off Peak Speed [km/h]	Rural Speed [km/h]	Highway Speed [km/h]
Passenger Cars	Petrol	Mini	Euro 4	0.25	0.25	0.25	0.25	14.2727	14.2727	14.2727	14.2727
Passenger Cars	Petrol	Mini	Euro 5	0.25	0.25	0.25	0.25	14.2727	14.2727	14.2727	14.2727
Passenger Cars	Petrol	Mini	Euro 6 a/b/c	0.25	0.25	0.25	0.25	14.2727	14.2727	14.2727	14.2727
Passenger Cars	Petrol	Small	Euro 3	0.25	0.25	0.25	0.25	21	21	21	21
Passenger Cars	Petrol	Small	Euro 4	0.25	0.25	0.25	0.25	21	21	21	21
Passenger Cars	Petrol	Small	Euro 5	0.25	0.25	0.25	0.25	21	21	21	21
Passenger Cars	Petrol	Small	Euro 6 a/b/c	0.25	0.25	0.25	0.25	21	21	21	21
Passenger Cars	Petrol	Medium	Euro 3	0.25	0.25	0.25	0.25	31.3635	31.3635	31.3635	31.3635
Passenger Cars	Petrol	Medium	Euro 4	0.25	0.25	0.25	0.25	31.3635	31.3635	31.3635	31.3635
Passenger Cars	Petrol	Medium	Euro 5	0.25	0.25	0.25	0.25	31.3635	31.3635	31.3635	31.3635
Passenger Cars	Petrol	Medium	Euro 6 a/b/c	0.25	0.25	0.25	0.25	31.3635	31.3635	31.3635	31.3635
Passenger Cars	Petrol	Large-SUV-Executive	Euro 3	0.25	0.25	0.25	0.25	23.7271	23.7271	23.7271	23.7271
Passenger Cars	Petrol	Large-SUV-Executive	Euro 4	0.25	0.25	0.25	0.25	23.7271	23.7271	23.7271	23.7271
Passenger Cars	Petrol	Large-SUV-Executive	Euro 5	0.25	0.25	0.25	0.25	23.7271	23.7271	23.7271	23.7271
Passenger Cars	Petrol	Large-SUV-Executive	Euro 6 a/b/c	0.25	0.25	0.25	0.25	23.7271	23.7271	23.7271	23.7271
Passenger Cars	Diesel	Small	Euro 3	0.25	0.25	0.25	0.25	21	21	21	21
Passenger Cars	Diesel	Small	Euro 4	0.25	0.25	0.25	0.25	21	21	21	21
Passenger Cars	Diesel	Small	Euro 5	0.25	0.25	0.25	0.25	21	21	21	21
Passenger Cars	Diesel	Small	Euro 6 a/b/c	0.25	0.25	0.25	0.25	21	21	21	21
Passenger Cars	Diesel	Large-SUV-Executive	Euro 3	0.25	0.25	0.25	0.25	23.7271	23.7271	23.7271	23.7271
Passenger Cars	Diesel	Large-SUV-Executive	Euro 4	0.25	0.25	0.25	0.25	23.7271	23.7271	23.7271	23.7271
Passenger Cars	Diesel	Large-SUV-Executive	Euro 5	0.25	0.25	0.25	0.25	23.7271	23.7271	23.7271	23.7271
Passenger Cars	Diesel	Large-SUV-Executive	Euro 6 a/b/c	0.25	0.25	0.25	0.25	23.7271	23.7271	23.7271	23.7271
Passenger Cars	CNG Bifuel	Mini	Euro 4	0.25	0.25	0.25	0.25	14.2727	14.2727	14.2727	14.2727
Passenger Cars	CNG Bifuel	Mini	Euro 5	0.25	0.25	0.25	0.25	14.2727	14.2727	14.2727	14.2727
Passenger Cars	CNG Bifuel	Mini	Euro 6 a/b/c	0.25	0.25	0.25	0.25	14.2727	14.2727	14.2727	14.2727
Passenger Cars	CNG Bifuel	Mini	Euro 6 d-temp	0.25	0.25	0.25	0.25	14.2727	14.2727	14.2727	14.2727
Passenger Cars	CNG Bifuel	Small	Euro 4	0.25	0.25	0.25	0.25	21	21	21	21
Passenger Cars	CNG Bifuel	Small	Euro 5	0.25	0.25	0.25	0.25	21	21	21	21
Passenger Cars	CNG Bifuel	Small	Euro 6 a/b/c	0.25	0.25	0.25	0.25	21	21	21	21
Passenger Cars	CNG Bifuel	Small	Euro 6 d-temp	0.25	0.25	0.25	0.25	21	21	21	21
Passenger Cars	CNG Bifuel	Medium	Euro 4	0.25	0.25	0.25	0.25	31.3635	31.3635	31.3635	31.3635
Passenger Cars	CNG Bifuel	Medium	Euro 5	0.25	0.25	0.25	0.25	31.3635	31.3635	31.3635	31.3635
Passenger Cars	CNG Bifuel	Medium	Euro 6 a/b/c	0.25	0.25	0.25	0.25	31.3635	31.3635	31.3635	31.3635
Passenger Cars	CNG Bifuel	Medium	Euro 6 d-temp	0.25	0.25	0.25	0.25	31.3635	31.3635	31.3635	31.3635
Passenger Cars	CNG Bifuel	Large-SUV-Executive	Euro 4	0.25	0.25	0.25	0.25	23.7271	23.7271	23.7271	23.7271
Passenger Cars	CNG Bifuel	Large-SUV-Executive	Euro 5	0.25	0.25	0.25	0.25	23.7271	23.7271	23.7271	23.7271
Passenger Cars	CNG Bifuel	Large-SUV-Executive	Euro 6 a/b/c	0.25	0.25	0.25	0.25	23.7271	23.7271	23.7271	23.7271
Passenger Cars	CNG Bifuel	Large-SUV-Executive	Euro 6 d-temp	0.25	0.25	0.25	0.25	23.7271	23.7271	23.7271	23.7271
Light Commercial Vehicles	Diesel	N1-II	Euro 3	0.25	0.25	0.25	0.25	25.4542	25.4542	25.4542	25.4542
Light Commercial Vehicles	Diesel	N1-II	Euro 4	0.25	0.25	0.25	0.25	25.4542	25.4542	25.4542	25.4542
Light Commercial Vehicles	Diesel	N1-II	Euro 5	0.25	0.25	0.25	0.25	25.4542	25.4542	25.4542	25.4542
Light Commercial Vehicles	Diesel	N1-II	Euro 6 a/b/c	0.25	0.25	0.25	0.25	25.4542	25.4542	25.4542	25.4542
Heavy Duty Trucks	Diesel	Rigid <=7,5 t	Euro III	0.25	0.25	0.25	0.25	25.4542	25.4542	25.4542	25.4542
Heavy Duty Trucks	Diesel	Rigid <=7,5 t	Euro IV	0.25	0.25	0.25	0.25	25.4542	25.4542	25.4542	25.4542
Heavy Duty Trucks	Diesel	Rigid <=7,5 t	Euro V	0.25	0.25	0.25	0.25	25.4542	25.4542	25.4542	25.4542
Heavy Duty Trucks	Diesel	Rigid <=7,5 t	Euro VI A/B/C	0.25	0.25	0.25	0.25	25.4542	25.4542	25.4542	25.4542
Heavy Duty Trucks	Diesel	Rigid 14 - 20 t	Euro III	0.25	0.25	0.25	0.25	28.5454	28.5454	28.5454	28.5454
Heavy Duty Trucks	Diesel	Rigid 14 - 20 t	Euro IV	0.25	0.25	0.25	0.25	28.5454	28.5454	28.5454	28.5454
Heavy Duty Trucks	Diesel	Rigid 14 - 20 t	Euro V	0.25	0.25	0.25	0.25	28.5454	28.5454	28.5454	28.5454
Heavy Duty Trucks	Diesel	Rigid 14 - 20 t	Euro VI A/B/C	0.25	0.25	0.25	0.25	28.5454	28.5454	28.5454	28.5454
Heavy Duty Trucks	Diesel	Rigid 20 - 26 t	Euro II	0.25	0.25	0.25	0.25	28.5454	28.5454	28.5454	28.5454
Heavy Duty Trucks	Diesel	Rigid 20 - 26 t	Euro III	0.25	0.25	0.25	0.25	28.5454	28.5454	28.5454	28.5454
Heavy Duty Trucks	Diesel	Rigid 20 - 26 t	Euro IV	0.25	0.25	0.25	0.25	28.5454	28.5454	28.5454	28.5454
Heavy Duty Trucks	Diesel	Rigid 20 - 26 t	Euro V	0.25	0.25	0.25	0.25	28.5454	28.5454	28.5454	28.5454
Buses	Diesel	Urban Buses Midi <=15 t	Euro III	0.25	0.25	0.25	0.25	32.4542	32.4542	32.4542	32.4542
Buses	Diesel	Urban Buses Midi <=15 t	Euro IV	0.25	0.25	0.25	0.25	32.4542	32.4542	32.4542	32.4542
Buses	Diesel	Urban Buses Midi <=15 t	Euro V	0.25	0.25	0.25	0.25	32.4542	32.4542	32.4542	32.4542
Buses	Diesel	Urban Buses Midi <=15 t	Euro VI A/B/C	0.25	0.25	0.25	0.25	32.4542	32.4542	32.4542	32.4542
Buses	Diesel	Urban Buses Standard 15 - 18 t	Euro II	0.25	0.25	0.25	0.25	24.6365	24.6365	24.6365	24.6365
Buses	Diesel	Urban Buses Standard 15 - 18 t	Euro III	0.25	0.25	0.25	0.25	24.6365	24.6365	24.6365	24.6365
Buses	Diesel	Urban Buses Standard 15 - 18 t	Euro IV	0.25	0.25	0.25	0.25	24.6365	24.6365	24.6365	24.6365
Buses	Diesel	Urban Buses Standard 15 - 18 t	Euro V	0.25	0.25	0.25	0.25	24.6365	24.6365	24.6365	24.6365
Buses	Diesel	Coaches Standard <=18 t	Euro III	0.25	0.25	0.25	0.25	34.8277	34.8277	34.8277	34.8277
Buses	Diesel	Coaches Standard <=18 t	Euro IV	0.25	0.25	0.25	0.25	34.8277	34.8277	34.8277	34.8277
Buses	Diesel	Coaches Standard <=18 t	Euro V	0.25	0.25	0.25	0.25	34.8277	34.8277	34.8277	34.8277
Buses	Diesel	Coaches Standard <=18 t	Euro VI A/B/C	0.25	0.25	0.25	0.25	34.8277	34.8277	34.8277	34.8277
Buses	CNG	Urban CNG Buses	Euro I	0.25	0.25	0.25	0.25	24.6365	24.6365	24.6365	24.6365
Buses	CNG	Urban CNG Buses	Euro II	0.25	0.25	0.25	0.25	24.6365	24.6365	24.6365	24.6365
Buses	CNG	Urban CNG Buses	Euro III	0.25	0.25	0.25	0.25	24.6365	24.6365	24.6365	24.6365
Buses	CNG	Urban CNG Buses	EEV	0.25	0.25	0.25	0.25	24.6365	24.6365	24.6365	24.6365
L-Category	Petrol	Motorcycles 4-stroke <250 cm³	Euro 1	0.25	0.25	0.25	0.25	22	22	22	22
L-Category	Petrol	Motorcycles 4-stroke <250 cm³	Euro 2	0.25	0.25	0.25	0.25	22	22	22	22
L-Category	Petrol	Motorcycles 4-stroke <250 cm³	Euro 3	0.25	0.25	0.25	0.25	22	22	22	22
L-Category	Petrol	Motorcycles 4-stroke <250 cm³	Euro 4	0.25	0.25	0.25	0.25	22	22	22	22
